# Supplementary material for: Predictors for future activity limitation in women with chronic low back pain consulting primary care: a 2-year prospective longitudinal cohort study
Source: PubMed Central journal article supplement — BMJ Open. 2017 Jul 2;7(6):e013974. doi: 10.1136/bmjopen-2016-013974 (PMC5734216; doi:10.1136/bmjopen-2016-013974), 2017-07-02
Supplement: bmjopen-2016-013974.draft_revisions.pdf [file bmjopen-2016-013974.draft_revisions.pdf]

# BMJ Open

## Predictors for future activity limitation in women with chronic low back pain consulting primary care: a two-year prospective longitudinal cohort study

|                                 |                                                                                                                                                                                                                                                                                                                                                                                                                                                                                                                                                                                                                                                         |
|---------------------------------|---------------------------------------------------------------------------------------------------------------------------------------------------------------------------------------------------------------------------------------------------------------------------------------------------------------------------------------------------------------------------------------------------------------------------------------------------------------------------------------------------------------------------------------------------------------------------------------------------------------------------------------------------------|
| Journal:                        | <i>BMJ Open</i>                                                                                                                                                                                                                                                                                                                                                                                                                                                                                                                                                                                                                                         |
| Manuscript ID                   | bmjopen-2016-013974                                                                                                                                                                                                                                                                                                                                                                                                                                                                                                                                                                                                                                     |
| Article Type:                   | Research                                                                                                                                                                                                                                                                                                                                                                                                                                                                                                                                                                                                                                                |
| Date Submitted by the Author:   | 28-Aug-2016                                                                                                                                                                                                                                                                                                                                                                                                                                                                                                                                                                                                                                             |
| Complete List of Authors:       | Nordeman, Lena; Närhälsan Research and Development Primary Health Care, Region Västra Götaland, Research and Development Center Södra Älvsborg; Göteborgs universitet Sahlgrenska Akademin, Institute of Neuroscience and Physiology, Department of Health and Rehabilitation, Unit of Physiotherapy<br>Thorselius, Lena; Närhälsan, Health Unit, Primary Health Care<br>Gunnarsson, Ronny; James Cook University College of Medicine and Dentistry, Cairns Clinical School<br>Mannerkorpi, Kaisa; Göteborgs universitet Sahlgrenska Akademin, Institute of Neuroscience and Physiology, Department of Health and Rehabilitation, Unit of Physiotherapy |
| <b>Primary Subject Heading</b>: | General practice / Family practice                                                                                                                                                                                                                                                                                                                                                                                                                                                                                                                                                                                                                      |
| Secondary Subject Heading:      | Rehabilitation medicine                                                                                                                                                                                                                                                                                                                                                                                                                                                                                                                                                                                                                                 |
| Keywords:                       | chronic pain, low back pain, PRIMARY CARE, Life style, disability                                                                                                                                                                                                                                                                                                                                                                                                                                                                                                                                                                                       |
|                                 |                                                                                                                                                                                                                                                                                                                                                                                                                                                                                                                                                                                                                                                         |

SCHOLARONE™  
Manuscripts

1  
2  
3 **Predictors for future activity limitation in women with chronic low back**  
4 **pain consulting primary care: a two-year prospective longitudinal cohort**  
5 **study**  
6  
7  
8  
9

10  
11  
12  
13 Lena Nordeman PhD RPT<sup>a,b</sup>, Lena Thorselius BCs RPT<sup>c</sup>, Ronny Gunnarsson assoc prof  
14 MD<sup>a,d,e</sup>, Kaisa Mannerkorpi prof. RPT<sup>b</sup>  
15

16  
17 *<sup>a</sup>Närhälsan, Research and Development Primary Health Care Region Västra Götaland, Research and*  
18 *Development Center Södra Älvsborg, Sweden; <sup>b</sup>University of Gothenburg, Sahlgrenska Academy, Institute of*  
19 *Neuroscience and Physiology, Department of Health and Rehabilitation, Unit of Physiotherapy, Sweden;*  
20 *<sup>c</sup>Närhälsan, Health Unit, Primary Health Care Region Västra Götaland, Sweden; <sup>d</sup>University of Gothenburg,*  
21 *Sahlgrenska Academy, Institute of Medicine, Department of Public Health and Community Medicine, Sweden;*  
22 *<sup>e</sup>Cairns clinical school, College of Medicine and Dentistry, James Cook University, Australia*  
23  
24  
25  
26

27 **Word count** (excluding title page, abstract, references, figures and tables): **2894**

28 **Word count** (abstract): **299**

29 **Table count:** **3**

30 **Figure count:** **1**

31 **References:** **63**

32  
33  
34  
35  
36  
37  
38  
39 **Corresponding author**

40 Lena Nordeman

41 Närhälsan, Research and Development Primary Health Care  
42 Region Västra Götaland

43 Research and Development Center Södra Älvsborg

44 Sven Eriksonsplatsen 4, S-503 38 Borås, Sweden

45 Switchboard: +46 10-43 59 410

46 Mobile: +46-70-171 44 63

47 E-mail: [lena.nordeman@vgregion.se](mailto:lena.nordeman@vgregion.se)  
48  
49  
50  
51  
52  
53  
54  
55  
56  
57  
58  
59  
60

## ABSTRACT

**Objectives.** To assess if body function, activity, participation, health-related quality of life and lifestyle behavioral factors can predict the future activity limitation in women with chronic low back pain (CLBP) in primary health care (PHC) two years later.

**Design.** A two-year prospective longitudinal cohort study within PHC.

**Settings:** Primary health care in south-western Sweden.

**Participants:** The cohort comprised 130 women with CLBP attending PHC at baseline 2004-2005 and were re-assessed after two years.

**Measures.** The dependent outcome variable was self-reported activity limitation (Roland Morris disability questionnaire (RMDQ)) at two-year follow-up. Independent predictors at baseline were BMI, smoking, alcohol consumption, sleep quantity and quality, leisure time physical activity, a questionnaire of the clinical manifestation of stress (Stress and Crises Inventory (SCI-93)), pain localisation, pain intensity, fatigue, anxiety, depression, RMDQ, work status, private social support, health-related quality of life and measures of physical performance specified as the six-minute walk test (6MWT) and hand grip strength. Relation between baseline predictors and variation in later self-reported activity limitation RMDQ was analysed using multivariate linear regression.

**Results.** Ninety-five percent (n=123/130) were followed up after two years. The participants were middle-aged (mean 45 (SD10) years), mostly educated more than 9 years (88%;118/123), mainly living with another adult (76%;93/122) and born in Sweden (90%;111/123). Seventy-nine percent (97/123) were categorized as having work ability at baseline. The final prognostic model including 6MWT, SCI-93 and RMDQ at baseline explained 54% of the variance in self-reported activity limitation (RMDQ) at the two-year follow-up.

**Conclusions:** Lower physical performance (6MWT), more severe clinical stress symptoms

1  
2  
3 (SCI-93) and more severe activity limitation (RMDQ) predicted activity limitation (RMDQ)  
4  
5 after two years in women with CLBP within PHC. This result suggests that interventions  
6  
7 aiming to improve physical capacity and decrease stress are likely to be important for women  
8  
9 with CLBP to improve the prognosis.  
10

11  
12  
13  
14 **Key Words:** Chronic Pain, Low Back Pain, Primary Health Care, Life Style, Disability  
15  
16 Evaluation, Prognostic Factors, Women.  
17  
18  
19  
20  
21  
22  
23  
24  
25  
26  
27  
28  
29  
30  
31  
32  
33  
34  
35  
36  
37  
38  
39  
40  
41  
42  
43  
44  
45  
46  
47  
48  
49  
50  
51  
52  
53  
54  
55  
56  
57  
58  
59  
60

### Strengths and limitations of this study

- The main strength of this study is the longitudinal prospective design over two years within primary health care, high long-term follow up (95%), measurements representing all the domains of International Classification of Functioning, Disability and health (ICF) complemented with lifestyle behavioural factors.
- The limitation of this study is that we included only women so the influence of gender can't be analysed.

## INTRODUCTION

Non-specific chronic low back pain (CLBP), defined as pain duration longer than three months, is associated with variations of recurrent or persistent pain.<sup>1,2</sup> CLBP have various impact on body functions, activity and participation in daily life<sup>1-4</sup> and it is a common cause for attending health care.<sup>1</sup>

Non-specific acute low back pain (LBP) is described to have a spontaneous course.<sup>1,2,5</sup> However, after one year 63-82% of primary care patients with LBP report to have recurrent LBP and 20-45% impaired function.<sup>6-10</sup> Prognostic factors for the transition from non-specific acute LBP to CLBP has previously been described in personal and socioeconomic areas as well as in all domains of the International Classification of Functioning, Disability and Health (ICF).<sup>6,9,11-18</sup> Women seems to have a greater risk for CLBP<sup>6</sup> and when studying prognostic factors it is suggested to assess women separately.<sup>19-21</sup> Previous prognostic models for the transition to CLBP explain 28-51% of variability in the measured outcome.<sup>22</sup> The outcomes, combination of included prognostic factors and statistical analyses often differs between studies, making comparisons or meta-analysis difficult.<sup>18</sup>

Some studies have described similar prognostic factors for persistent CLBP as for the transition from non-specific acute LBP to CLBP.<sup>23,24</sup> Since the course of non-specific acute LBP and CLBP differs, more knowledge of prognostic factors for varying outcomes in patients with CLBP is warranted.<sup>25</sup> A previous review studying prognostic factors for delayed recovery in CLBP found no association between age, sex and the outcome measure of pain intensity and disability at short-term follow-up (e.g. 6-weeks). Conflicting evidence was found for fear of avoidance as a predictor.<sup>26</sup> At long-term follow-up (e.g. 6 months) no association was found between smoking, pain intensity, fear of avoidance and the dependent variable disability.<sup>26</sup> Conflicting evidence was found for age, sex and physical job demands and the outcome measure of pain intensity and disability. Moreover, conflicting evidence was

1  
2  
3 found for the association between age, activities of daily living, pain intensity and physical  
4  
5 job demand and the outcome return to work.<sup>26</sup> However, recently a study showed that a  
6  
7 physical performance test (6-minute walk test), depression and earlier work ability predicted  
8  
9 later work ability in women with CLBP.<sup>27</sup>  
10

11 The knowledge about various prognostic factors for the recovery for patients with CLBP is  
12  
13 still insufficient. Moreover, the prognostic value of lifestyle behavioral factors, stress  
14  
15 symptoms and physical performance for later activity limitation in CLBP is unknown.  
16  
17

18 The aim was to assess if body function, activity, participation, health-related quality of life  
19  
20 and lifestyle behavioral factors can predict the future variance of self-rated activity limitation  
21  
22 in women with CLBP in PHC two years later.  
23  
24  
25  
26  
27  
28  
29

## 30 **METHODS**

### 31 **Study design**

32  
33 This two-year prospective longitudinal cohort study included women (n=130) with CLBP  
34  
35 within PHC.<sup>28</sup> Patients were assessed at baseline and were re-assessed after two years.  
36  
37  
38 Predictors for later self-reported activity limitation (Roland Morris disability questionnaire  
39  
40 (RMDQ)), was analysed by multivariate linear regression. Independent variables found to be  
41  
42 associated with disability in CLBP patients,<sup>27</sup> were complemented with lifestyle behavioural  
43  
44 factors including Body Mass Index (BMI), smoking, alcohol consumption, sleep quantity and  
45  
46 quality, leisure time physical activity and a questionnaire of the clinical manifestation of  
47  
48 stress. Other independent variables related to chronic pain were pain localisation, pain  
49  
50 intensity, fatigue, anxiety, depression, work status, private social support health-related  
51  
52 quality of life and two measures of physical performance.  
53  
54  
55  
56  
57  
58  
59  
60

1  
2  
3 Participants were assessed by a trained physical therapist in PHC both at baseline and after  
4 two years and included a structured interview, measure of body height and weight, and the  
5 two physical performance tests. Participants were asked to fill in a package of self-  
6  
7  
8 administrated questionnaires at the assessment and two at home. They were provided with a  
9  
10 pre-paid addressed envelope to return questionnaires. If no questionnaires were returned  
11  
12 within two weeks, a reminder by telephone was made. The Regional Ethical Review Board in  
13  
14 Gothenburg approved the study. Written informed consent was obtained from all patients.  
15  
16  
17  
18  
19

### 20 21 **Selection of patients**

22  
23 Female patients were identified by systematic search in medical charts for LBP diagnoses  
24 “M545” (ICD-10) at eight PHC clinics in south-western Sweden, a mixture of urban and rural  
25  
26 populations, in 2004-2005. All patients who could be contacted, accepting participation and  
27  
28 fulfilling the inclusion criteria were invited to enroll in the study. The inclusion criteria were:  
29  
30 female patient, low back pain (pain between costal margins and gluteal folds) with or without  
31  
32 referred leg pain.<sup>1</sup> Further inclusion criteria were; longer than 12-week’s duration of  
33  
34 symptoms, not pregnant, no known spinal pathology, no other severe co-morbidity, age  
35  
36 between 18 and 60 years, understanding and fluent in Swedish. At the two-year follow-up, all  
37  
38 patients included in the cross-sectional study (n=130),<sup>28</sup> who could be contacted and  
39  
40 accepting participation were invited to the follow-up, containing the same study protocol as at  
41  
42 baseline.  
43  
44  
45  
46  
47  
48

### 49 50 **Measurements**

51  
52 The structured interview included questions about age, nationality, education level, family  
53  
54 situation, work status, back pain history (onset, duration and symptoms), co-morbidity and  
55  
56 pharmacological treatment.  
57  
58  
59  
60



1  
2  
3 *1. Lifestyle behavioural factors*  
4

5 *1.1 Body Mass Index (BMI)*  
6

7 Height and weight were assessed for calculating the BMI (kg/m<sup>2</sup>).  
8  
9

10  
11  
12  
13 *1.2 Alcohol consumption*  
14

15 For alcohol consumption the Alcohol Use Disorders Identification Test (Audit-C)<sup>29</sup> was used  
16 (range 0-12). Higher scores indicate higher alcohol consumption.  
17  
18

19  
20  
21  
22 *1.3 Smoking*  
23

24 Tobacco use was dichotomized into two categories, No smoker or smoker. The category, no  
25 smoker required to never been smoking. The category smoker required to previously been a  
26 smoker or are reported to be currently smoking.  
27  
28  
29

30  
31  
32  
33 *1.4 Sleep*  
34

35 For sleep quantity and quality two questions was used.<sup>30</sup> “Do you think you get enough  
36 sleep?” (range 1-4) and “On the whole, how do you think you sleep?”(range 1-4). Higher  
37 score indicate better sleep quantity and quality.  
38  
39  
40  
41  
42

43  
44 *1.5 Stress symptoms*  
45

46 To quantify clinical manifestations of stress symptoms the Stress and Crises Inventory (SCI-  
47 93) was used (range 0-140) where higher scores indicate more severe clinical stress  
48 symptoms.<sup>31, 32</sup> A total score of  $\leq 38$  indicates normal resources for activity and work.<sup>33</sup>  
49  
50  
51  
52

53  
54  
55 *1.6 Physical activity at leisure time*  
56  
57  
58  
59  
60

1  
2  
3 The Leisure Time Physical Activity Instrument (LTPAI) was used to assess the amount of  
4 physical activity in leisure time during a typical week.<sup>34</sup> The number of hours spent for light,  
5 moderate and vigorous activities was registered and the total number of hours were used.<sup>34</sup>  
6  
7  
8  
9

## 10 11 12 *2. Body function*

### 13 14 *2.1 Physical performance tests*

15  
16 The 6-minute walk test (6MWT) was used to assess physical performance.<sup>35-37</sup> The distance  
17 (meter) is measured while the patient walks up and down a 30 meter corridor for 6 minutes.  
18  
19 The participant was instructed to walk as quickly as possible without running.  
20  
21

22  
23 Hand grip strength was measured with an electronic instrument Grippit<sup>®</sup>.<sup>38, 39</sup> A sustained  
24 voluntary 10-second contraction was measured. The right hand value was used for analyses in  
25 the present study.  
26  
27  
28  
29

### 30 31 32 *2.2 Number of pain localisation, pain intensity and fatigue*

33  
34 For pain distribution, a drawing of the body was used for register pain localisations (0-18).<sup>40</sup>  
35  
36 Pain intensity and fatigue during the last week was measured on a visual analogue scale 0-100  
37 mm (VAS).  
38  
39  
40  
41

### 42 43 *2.3 Distress*

44  
45 The Hospital Anxiety and Depression Scale (HADS), HADS-A was used for assessment of  
46 anxiety, (range 0-21) and the HADS-D for depression (range 0-21). Higher scores indicate  
47 greater anxiety or depression.<sup>41, 42</sup>  
48  
49  
50  
51

## 52 53 54 *3. Activity limitations*

1  
2  
3 The RMDQ was used for self-reported activity limitation related to LBP. The RMDQ consists  
4 of 24 yes/no statements, where higher scores indicate greater activity limitation (range 0-24).  
5  
6

7 43  
8  
9

#### 10 11 12 *4. Participation*

13  
14 Work status was dichotomized into two categories, work ability or not. The category, work  
15 ability required work or study, full or part-time, applying for work, parental leave full or part-  
16 time or part-time disability pension. The category no work ability required full-time sick leave  
17 or full-time disability pension. Self-reported sick absenteeism has been shown reliable.<sup>44</sup>  
18  
19  
20  
21  
22  
23

#### 24 25 *5. Environmental factors*

26  
27 The 4-item version of Medical Outcome Study Social Support Survey (MOS-SSS) registered  
28 private social support: emotional-informational, tangible, affectionate support and positive  
29 social interaction (range 1-5 for each item). Higher scores indicate more support (total range  
30 4-20).<sup>45</sup>  
31  
32  
33  
34  
35  
36  
37

#### 38 39 *6. Health-related quality of life*

40 The SF-36 short form health survey (SF-36) was used for general health status. The Physical  
41 Component Summary score (PCS) and the Mental Component Summary score (MCS)  
42 representing an overall health index of physical or mental health (range 0-100) were used.<sup>46-48</sup>  
43  
44  
45  
46  
47  
48

#### 49 **Statistical analysis**

50  
51 Group characteristics are presented as mean and standard deviations (SD), median and 25<sup>th</sup>  
52 and 75<sup>th</sup> percentile or the number and percentage at baseline. Percentages change for RMDQ  
53  
54  
55  
56  
57  
58  
59  
60

1  
2  
3 was constructed by subtracting baseline value from two-year follow-up value. The change  
4  
5 was divided with baseline and multiplied by 100 to create a percentage change.  
6

7  
8 Multivariate regressions were used to identify predictors of self-reported activity limitation  
9  
10 related to LBP (RMDQ) at the two-year follow-up. Independent variables were age, BMI,  
11  
12 smoking, AUDIT-C, sleep quantity and quality, SCI-93, LTPAI, 6MWT, hand grip strength,  
13  
14 number of pain localisations, pain intensity, fatigue, HADS-A, HADS-D, RMDQ at baseline,  
15  
16 work ability, MOS-SSS, PCS and MCS obtained at baseline. Firstly, the RMDQ at the two-  
17  
18 year follow-up was used as dependent variable. Secondly, percentage change was used as  
19  
20 dependent variable excluding RMDQ at baseline as an independent variable.  
21  
22

23  
24 Prior to the multivariate linear regression, the variables were evaluated for the assumptions  
25  
26 of multivariate analysis. The dependent variable RMDQ fulfilled the assumption of normal  
27  
28 distribution when ranked using Blom's formula.<sup>49</sup> The statistical criteria for the independent  
29  
30 variables were 0.05 for entry and 0.10 for removal. Multi-collinearity was checked by the  
31  
32 values of Tolerance and VIF.  
33

34  
35 To enable more meaningful clinical interpretation small units were transformed to larger  
36  
37 ones. In 6MWT one meter was transformed to 100 meter, in hand grip strength one Newton  
38  
39 was transformed to 50 Newton, in the pain and fatigue scores, one mm was transformed to 10  
40  
41 mm (VAS).  
42

43  
44 First, Spearman Rank correlation between RMDQ at two years and each of the  
45  
46 independent variables at baseline was performed as a sorting mechanism. Secondly, a  
47  
48 stepwise multivariate linear regression including the independent variables that had  
49  
50 significant correlation to RMDQ in the first step was performed. The same procedure was  
51  
52 performed with percentage change in RMDQ as dependent variable.  
53

54  
55 The level of significance for independent variables remaining in the final model was set to  
56  
57 0.05. The IBM SPSS Windows version 22.0 was used for the statistical analyses.  
58  
59

## RESULTS

Ninety-five percent (n=123/130) of the participants included in the cross-sectional study<sup>28</sup> could be followed up after two years (Figure 1). Seven patients could not be assessed at the two-year follow-up, three of them due to pregnancy, an exclusion criteria in the present study. The participants were middle-aged (mean 45 (SD10)), mostly educated more than 9 years (88%; 118/123), mainly living with another adult (76%; 93/122) and born in Sweden (90%; 111/123) (Table 1). Seventy-nine percent (97/123) were categorized as having work ability at baseline. The BMI mean and median values of 27 (SD 5.5) and 26 (25<sup>th</sup>;75<sup>th</sup> percentile 23; 29) indicates that a significant proportion were overweight ( $\geq 25$  BMI).<sup>50</sup> Seventy-six percent (n=93/123) were currently non-smokers and did not exceed risk consumption of alcohol (Table 2). Only 14% (17/123) reported sleeping certainly enough and 19% (23/121) reported very good sleep quality (Table 2). Body function, activity, participation and quality of life at baseline indicates that these aspects of life varied and several of them were not optimal (Table 2).

Table 1. Group characteristics at baseline (n=123)

| <b>Personal data</b>                                        |               |
|-------------------------------------------------------------|---------------|
| Age, years [mean (SD)]                                      | 45 (10)       |
| Nationality Swedish [% (n/n)]                               | 90% (111/123) |
| Symptom duration, years [mean (SD)]                         | 9.6 (8.8)     |
| <b>Education status [% ( n/n)]</b>                          |               |
| ≤ 9 years                                                   | 12% (15/123)  |
| 10-12 years                                                 | 40% (49/123)  |
| > 12 years                                                  | 48% (59/123)  |
| <b>Social status [% (n/n)]</b>                              |               |
| Living with an adult                                        | 26% (32/122)  |
| Living with an adult and child/children                     | 50% (61/122)  |
| Living alone                                                | 12% (14/122)  |
| Living alone with child/children                            | 9.0% (11/122) |
| Living apart with an adult                                  | 3.3% (4/122)  |
| <b>Pharmacological treatment, yes [% (n/n)]<sup>a</sup></b> |               |
| Analgesics                                                  | 53% (65/123)  |
| Psychotropic drugs                                          | 16% (20/123)  |
| <b>Employment Status [% (n/n)]</b>                          |               |
| Currently working and/or studying                           | 58% (71/123)  |
| Sick-leave, full-time                                       | 11% (13/123)  |
| Sick-leave, part-time                                       | 8.9% (11/123) |
| Disability pension, full-time                               | 11% (13/123)  |
| Disability pension, part-time                               | 5.7% (7/123)  |
| Parental leave, full-time                                   | 1.6% (2/123)  |
| Parental leave, part-time                                   | 1.6% (2/123)  |
| Unemployed, full-time                                       | 0.81% (1/123) |
| Unemployed, part-time                                       | 2.4% (3/123)  |

<sup>a</sup> The use last month registered by yes or no.

Table 2. Lifestyle factors, body function, activity, participation and health related quality of life at baseline (n=123).

| <b>Lifestyle behavioral factors</b>               |                              |
|---------------------------------------------------|------------------------------|
| Body Mass Index (kg/m <sup>2</sup> ) <sup>a</sup> | 27 (5.5) --- 26 (23; 29)     |
| Audit-C (0-12) <sup>b</sup>                       | 2.2 (1.4) --- 2.0 (1.0; 3.0) |
| Smoking [% (n/n)]                                 |                              |
| never smoked                                      | 40% (49/123)                 |
| previously smoked                                 | 36% (44/123)                 |
| currently smoking                                 | 20% (25/123)                 |
| currently snuffing                                | 4% (5/123)                   |
| Sleep quantity [% (n/n)] <sup>c</sup>             |                              |
| certainly enough                                  | 14% (17/123)                 |
| broadly enough                                    | 47% (58/123)                 |
| some shortage                                     | 24% (29/123)                 |
| clearly insufficient                              | 15% (19/123)                 |
| Sleep quality [% (n/n)] <sup>d</sup>              |                              |
| very good                                         | 19% (23/121)                 |
| quite good                                        | 51% (62/121)                 |
| quite bad                                         | 21% (25/121)                 |
| very bad                                          | 9% (11/121)                  |
| SCI-93 <sup>e</sup>                               | 36 (21) --- 35 (19; 51)      |
| LTPAI, hours per week (n= 122) <sup>f</sup>       | 7.8 (8.5) --- 6.0 (3.4; 9.0) |
| <b>Body function</b>                              |                              |
| Pain localizations (0-18) <sup>g</sup>            | 4.6 (3.2) --- 4.0 (2.0; 6.0) |
| Pain intensity (VAS 0-100 mm) <sup>h</sup>        | 45 (27) --- 45 (24; 68)      |
| Fatigue (VAS 0-100 mm) <sup>h</sup>               | 53 (29) --- 53 (28; 75)      |
| 6MWT (meter) (n=121)                              | 572 (86) --- 581 (515; 633)  |
| Hand grip strength (Newton)                       | 232 (76) --- 237 (184; 285)  |
| HADS-A (0-21) <sup>i</sup>                        | 6.4 (4.4) --- 5.0 (3.0; 9.0) |
| HADS-D (0-21) <sup>i</sup>                        | 4.3 (3.6) --- 3.0 (1.0; 7.0) |
| <b>Activity (n=121)</b>                           |                              |
| RMDQ (0-24) <sup>j</sup>                          | 8.4 (4.8) --- 7.0 (4.0; 12)  |
| <b>Participation</b>                              |                              |
| Work ability (yes) [% (n/n)]                      | 79% (97/123)                 |
| <b>Environmental factors</b>                      |                              |
| Private social support (4-20) <sup>k</sup>        | 16 (3.5) --- 17 (14; 19)     |
| <b>Health-related quality of life (n=122)</b>     |                              |
| PCS (0-100) <sup>l</sup>                          | 38 (9.9) --- 39 (31; 47)     |
| MCS (0-100) <sup>l</sup>                          | 46 (13) --- 49 (37; 56)      |

<sup>a</sup> First figure mean values (standard deviation). Second figure median values (25<sup>th</sup>; 75<sup>th</sup> percentile).

<sup>b</sup> The Alcohol Use Disorders Identification Test (AUDIT-C), 3 items. Higher scores reflect higher alcohol consumption (0-12).

<sup>c</sup> One item: "Do you think you get enough sleep?"

<sup>d</sup> One item: "On the whole, how do you think you sleep?"

<sup>e</sup> Stress and crisis inventory (SCI-93). Higher scores indicate more severe clinical stress symptoms (0-140).

<sup>f</sup> The Leisure Time Physical Activity Instrument (LTPAI) assess the total hours of physical activity in leisure time during a typical week.

<sup>g</sup> Self-reported pain locations registered by a figure with predefined body locations (0-18).

<sup>h</sup> Perceived pain intensity, fatigue over the last week rated on a visual analogue scale, VAS (0-100). Higher values indicate more pain, fatigue.

<sup>i</sup> Hospital Anxiety and Depression Scale (HADS). Higher scores indicate more anxiety (0-21) and depression (0-21).

<sup>j</sup> Roland Morris disability questionnaire (RMDQ) indicates disability related to low back pain (0-24) at baseline. Higher scores indicate more severe disability.

<sup>k</sup> Medical outcome study social support survey (MOS-SSS, 4- item scale) reflects private social support ranging from 1-5. Higher scores reflect more perceived support (4-20).

<sup>l</sup> SF-36. The physical component summary score (PCS) (0-100) and mental component summary score (MCS) (0-100).

### **Two-year follow-up RMDQ status**

There was a statistical significant mean decrease of 1.9 points (95% CI, 1.2-2.5) on RMDQ from 8.4 (SD 4.8) at baseline to 6.4 (SD 5.5) at the two-year follow-up ( $p < 0.0001$ ). The percentage decrease in RMDQ was 23 %.

### **Predictors for activity limitation (RMDQ) at the two-year follow-up**

The stepwise multivariate regression analysis showed that the 6MWT, SCI-93 and RMDQ at baseline were the most important predictors explaining 54 % of variance in the RMDQ at the two-year follow-up (Table 3).

There were no significant association between percentage change in RMDQ and any of the independent variables.



Table 3. Prognostic factors at baseline for activity limitation at the later two-year follow-up, using the Roland Morris disability Questionnaire (RMDQ) at two-year follow-up as the dependent variable (n=120).

|                                                | Spearman Rank Correlation |       |          | Stepwise multiple linear regression <sup>a</sup> |                   |
|------------------------------------------------|---------------------------|-------|----------|--------------------------------------------------|-------------------|
|                                                | number                    | r     | p-value  | β (CI 95%)                                       | p-value           |
| Age, years                                     | 120                       | 0.067 | 0.47     |                                                  |                   |
| <b>Lifestyle behavioural factors</b>           |                           |       |          |                                                  |                   |
| Body Mass Index (kg/m <sup>2</sup> )           | 119                       | 0.21  | 0.021    |                                                  |                   |
| Smoker (n=72) --- no smoker (n=48)             | 120                       | 0.14  | 0.14     |                                                  |                   |
| AUDIT-C (0-12) <sup>b</sup>                    | 118                       | -0.23 | 0.011    |                                                  |                   |
| Sleep quantity (1-4) <sup>c</sup>              | 120                       | -0.34 | 0.00014  |                                                  |                   |
| Sleep quality (1-4) <sup>d</sup>               | 118                       | -0.43 | <0.0001  |                                                  |                   |
| SCI-93 <sup>e</sup>                            | 120                       | 0.48  | <0.0001  | <b>0.0089 (0.0020 - 0.016)</b>                   | <b>0.012</b>      |
| LTPAI, (hours per week) <sup>f</sup>           | 119                       | -0.11 | 0.24     |                                                  |                   |
| <b>Body function</b>                           |                           |       |          |                                                  |                   |
| Pain localisations (0-18) <sup>g</sup>         | 120                       | 0.36  | 0.000052 |                                                  |                   |
| Pain intensity 10 mm (VAS 0-100) <sup>h</sup>  | 120                       | 0.20  | 0.027    |                                                  |                   |
| Fatigue 10 mm (VAS 0-100) <sup>h</sup>         | 120                       | 0.24  | 0.0078   |                                                  |                   |
| 6MWT, 100 meters                               | 118                       | -0.41 | <0.0001  | <b>-0.19 (-0.35 - -0.027)</b>                    | <b>0.023</b>      |
| Hand grip strength 50 N (Newton)               | 120                       | -0.17 | 0.070    |                                                  |                   |
| HADS-A (0-21) <sup>i</sup>                     | 120                       | 0.16  | 0.089    |                                                  |                   |
| HADS-D (0-21) <sup>i</sup>                     | 120                       | 0.37  | 0.000025 |                                                  |                   |
| <b>Activity</b>                                |                           |       |          |                                                  |                   |
| RMDQ at baseline (0-24) <sup>j</sup>           | 118                       | 0.71  | <0.0001  | <b>0.11 (0.071 - 0.14)</b>                       | <b>&lt;0.0001</b> |
| <b>Participation</b>                           |                           |       |          |                                                  |                   |
| Work ability (n=95) --- no work ability (n=25) | 120                       | -0.37 | 0.000026 |                                                  |                   |
| <b>Environmental factors</b>                   |                           |       |          |                                                  |                   |
| Private social support (4-20) <sup>k</sup>     | 120                       | -0.29 | 0.0013   |                                                  |                   |
| <b>Health-related quality of life</b>          |                           |       |          |                                                  |                   |
| PCS (0-100) <sup>l</sup>                       | 119                       | -0.42 | <0.0001  |                                                  |                   |
| MCS (0-100) <sup>l</sup>                       | 119                       | -0.28 | 0.0022   |                                                  |                   |

<sup>a</sup> Roland Morris disability questionnaire (RMDQ) score was transformed to ranked normal score of RMDQ, using Blom's formula. The variables shown, R<sup>2</sup> = 0.54.

<sup>b</sup> The Alcohol Use Disorders Identification Test (AUDIT-C), 3 items. Higher scores reflect higher alcohol consumption (0-12).

<sup>c</sup> One item: "Do you think you get enough sleep?". Higher scores indicates better sleep (1-4).

<sup>d</sup> One item: "On the whole, how do you think you sleep?". Higher scores indicates better sleep (1-4).

<sup>e</sup> Stress and crisis inventory (SCI-93). Higher scores indicate more severe clinical stress symptoms (0-140).

<sup>f</sup> The Leisure Time Physical Activity Instrument (LTPAI) assess the total hours of physical activity in leisure time during a typical week.

<sup>g</sup> Self-reported pain locations registered by a figure with predefined body locations (0-18).

<sup>h</sup> Perceived pain intensity, fatigue over the last week rated on a visual analogue scale, VAS (0-100). Higher values indicate more pain, fatigue.

<sup>i</sup> Hospital Anxiety and Depression Scale (HADS). Higher scores indicate more anxiety (0-21) and depression (0-21).

<sup>j</sup> Roland Morris disability questionnaire indicates disability related to low back pain (0-24) at baseline. Higher scores indicate more severe disability.

<sup>k</sup> Medical outcome study social support survey (MOS-SSS, 4- item scale) reflects private social support ranging from 1-5. Higher scores reflect more perceived support (4-20).

<sup>l</sup> SF-36. The physical component summary score (PCS) (0-100) and mental component summary score (MCS) (0-100).

## DISCUSSION

This two-year prospective cohort study of women with CLBP attending PHC showed that lower performance in walking capacity (6MWT), more severe clinical stress symptoms (SCI-93) and more severe activity limitation (RMDQ) at baseline predicted more activity limitation (RMDQ) after two years (Table 3). The model with these three predictors explained 54% of the variance in self-reported activity limitation (RMDQ) at the two-year follow-up, which is similar to a previous review of prediction models including various predictors for disability in patients with subacute non-specific LBP.<sup>22</sup>

### Strengths and limitations

This study included measurements representing all the domains of ICF<sup>17</sup> complemented with lifestyle behavioural factors, which is considered as a main strength. The follow-up frequency was very high with 95% being followed up.

Prevalence and predictors of chronic pain have been studied in general populations,<sup>21, 40, 51</sup> while the present study assessed women with CLBP consulting PHC, contributing with new knowledge for health care professionals working in PHC. Previous studies found that chronic pain is more common in women, and that women are at greater risk of chronic pain and disability.<sup>6, 40, 51</sup> It has been suggested that women should be assessed separately when studying prognostic factors for LBP,<sup>19, 20</sup> hence the present study included only female patients.

Self-administrated questionnaires are recommended for the assessment of activity limitation in patients with LBP.<sup>52</sup> The present study used RMDQ as the outcome measure at the two-year follow-up. The RMDQ is considered valid, commonly used and recommended in LBP research for monitoring disability.<sup>53, 54</sup> Seventeen statements in the RMDQ are reported

1  
2  
3 to be linked to the activity component in the ICF.<sup>55, 56</sup> However, self-reports may suffer from  
4  
5 the fact that some patients may under or overestimate their limitations and physical  
6  
7 performance tests are suggested to complement self-reports.<sup>57</sup> Walk capacity (6MWT) and  
8  
9 hand grip strength, semi-objective measures of body function, were therefore included as  
10  
11 potential predictors in this study.  
12

13  
14  
15 There was a statistical significant mean decrease of approximately 2 points on RMDQ  
16  
17 during the two-year period. Minimal clinical detectable change in the RMDQ is considered to  
18  
19 be 2 to 3 points. Others have suggested a change of 4 to 5 points to be of clinical value.<sup>53</sup>  
20  
21

### 22 23 24 25 **Predictors for activity limitation (RMDQ) at two-year follow-up** 26

27  
28 The BMI values corresponded with overweight (mean 27 (SD 5.5)), which is common in  
29  
30 patients with chronic pain<sup>28, 58</sup> and might be due to impaired body function, activity limitation  
31  
32 and restrictions of participation. A previous one-year follow up study found self-reported  
33  
34 weight and height (BMI) as a significant predictor for activity limitation.<sup>59</sup> However, this  
35  
36 could not be confirmed in the present study.  
37  
38

39  
40 Previously or currently smoking was not found as a predictor, which is concordant to a  
41  
42 review studying prognostic factors for pain and disability in CLBP.<sup>26</sup> In the present study,  
43  
44 hours per week of leisure time physical activity (LTPAI) (mean 7.8 (SD 8.5) was within  
45  
46 recommended levels of physical activity<sup>60</sup> which might have been the reason for no  
47  
48 prognostic value. A healthy lifestyle behavior, combinations of lifestyles factors, is reported  
49  
50 to influences the prognosis of LBP.<sup>21</sup> It could be interesting to combine and categorize various  
51  
52 self-reported lifestyles behavioral factors for analyzing their prognostic value for patients with  
53  
54 CLBP. However, in the present study the prognostic value of lifestyle behavioral factors were  
55  
56 analyzed separately for later self-reported activity limitation in CLBP.  
57  
58  
59  
60

1  
2  
3 Previous prospective studies of LBP have evaluated body function by measuring spinal  
4 motion and muscle strength, showing them to be of poor prognostic value.<sup>11, 61</sup> In the present  
5 study, the body function assessed by the 6MWT was of good prognostic value, showing that  
6 lower performance in the 6MWT at baseline predicted more severe activity limitation at two-  
7 year follow-up. Therefore, the 6MWT is recommended to be included as a complement to  
8 standard clinical examination of CLBP. Physical activity is a recommended intervention for  
9 patients with CLBP. The 6MWT is easy to perform and provides information of an  
10 individual's physical performance. In the future, the 6MWT might be used as a self-  
11 administrated assessment tool to promote physical activity and self-management strategies for  
12 patients with CLBP. However, the utility of 6MWT as a self-assessment tool needs to be  
13 studied further.

14  
15  
16  
17  
18  
19  
20  
21  
22  
23  
24  
25  
26  
27 More severe clinical stress symptoms (SCI-93), could independently predict more severe  
28 activity limitation (RMDQ) at the two-year follow-up (Table 3). The mean score for SCI-93 at  
29 baseline was 36 (SD 21) (Table 2), which indicates an increased level of clinical stress  
30 symptoms in the group, compared to the reference values.<sup>32, 33</sup> Signs and symptoms in patients  
31 with chronic pain are suggested to be associated with prolonged stress,<sup>62</sup> but measurement of  
32 clinical stress symptoms is not standard in the clinical assessment of patients with CLBP.  
33 Therefore, the SCI-93 could provide valuable information for predicting later activity  
34 limitation for these patients. Moreover, questionnaires assessing symptoms severity might  
35 stimulate the patient's motivation in using active coping strategies to alleviate their stress  
36 responses.<sup>32</sup>

37  
38  
39  
40  
41  
42  
43  
44  
45  
46  
47  
48  
49  
50  
51  
52  
53  
54  
55  
56  
57  
58  
59  
60  
60 In this study, the prognostic model including the baseline RMDQ, 6MWT, and SCI-93  
explained 54% of the variance in activity limitation (RMDQ) at the two-year follow-up (Table  
3), which is slightly more compared to findings in a previous review of different prognostic  
models explaining 28-51% of variance in persisting disability in LBP.<sup>22</sup> Knowledge about

1  
2  
3 factors that are associated with the probable recovery or not in CLBP can be used to improve  
4  
5 the management of patients with CLBP in primary care. The results of this study suggest that  
6  
7 interventions aiming to improve physical capacity and decrease stress are likely to be  
8  
9 successful in women with CLBP.  
10

## 11 12 13 14 15 16 **CONCLUSION**

17  
18 A walk test (6MWT), clinical stress symptoms (SCI-93) and activity limitation (RMDQ)  
19  
20 predicted future activity limitation in women with CLBP within PHC. The prognostic model  
21  
22 including these three predictors explained 54% of the variance in self-reported activity  
23  
24 limitation (RMDQ) after two years.  
25  
26  
27  
28  
29  
30  
31  
32  
33  
34  
35  
36  
37  
38  
39  
40  
41  
42  
43  
44  
45  
46  
47  
48  
49  
50  
51  
52  
53  
54  
55  
56  
57  
58  
59  
60

**Contributors**

LN contributed to the design of the study, were responsible for the data collection, participated in the statistical analysis, interpreted the data and drafted the first manuscript. LT contributed to the interpretation of data and revision of manuscript for important content. RG contributed to the design of the study, participated in the statistical analysis, interpreted the data and critically revised all versions of the manuscript. KM contributed to the design of the study, participated in the statistical analysis, interpreted the data and critically revised all versions of the manuscript. All authors read and approved the final manuscript.

**Funding**

Financial support was obtained from the research and development council of Södra Älvsborg, Region Västra Götaland, Sweden. The Health & Medical Care Committee of the Regional Executive Board, Region Västra Götaland, Sweden.

**Competing interests**

The authors declare that they have no competing interest.

**Ethics approval**

The Regional Ethical Review Board in Gothenburg approved the study. Written informed consent was obtained from all patients.

**Data sharing statement**

No additional data are available.

**Figure legends**

Figure 1. Participants flow.

For peer review only

**REFERENCES**

1. SBU. Ont i ryggen ont i nacken. En evidensbaserad kunskapssammanställning. SBU rapport 145, 1&2 (Back pain, Neck Pain; An evidence Based Review. Report no. 145, 1&2): Stockholm: The Swedish Council on Technology Assessment in Health Care; 2000 [ Swedish version available at. <http://www.sbu.se> Summary and conclusions available in English at the same web site ] [Cited 11 July 2010]
2. Waddell G. *Back Pain Revolution*. Second edition ed. Edinburgh: Churchill Livingstone; 2004.
3. Airaksinen O, Brox JI, Cedraschi C, et al. Chapter 4. European guidelines for the management of chronic nonspecific low back pain. *Eur Spine J*. 2006;15 Suppl 2:S192-300.
4. Bjorck-van Dijken C, Fjellman-Wiklund A, Hildingsson C. Low back pain, lifestyle factors and physical activity: a population based-study. *J Rehab Med*. 2008;40(10):864-9.
5. Koes BW, van Tulder MW, Ostelo R, et al. Clinical guidelines for the management of low back pain in primary care: an international comparison. *Spine*. 2001;26(22):2504-13; discussion 13-4.
6. Thomas E, Silman AJ, Croft PR, et al. Predicting who develops chronic low back pain in primary care: a prospective study. *BMJ*. 1999;318(7199):1662-7.
7. Von Korff M, Deyo RA, Cherkin D, et al. Back pain in primary care. Outcomes at 1 year. *Spine*. 1993;18(7):855-62.
8. Von Korff M, Saunders K. The course of back pain in primary care. *Spine*. 1996;21(24):2833-7; discussion 8-9.
9. Henschke N, Maher CG, Refshauge KM, et al. Prognosis in patients with recent onset low back pain in Australian primary care: inception cohort study. *BMJ*. 2008;337:a171.
10. Enthoven P, Skargren E, Oberg B. Clinical course in patients seeking primary care for back or neck pain: a prospective 5-year follow-up of outcome and health care consumption with subgroup analysis. *Spine*. 2004;29(21):2458-65.
11. Enthoven P, Skargren E, Carstensen J, et al. Predictive factors for 1-year and 5-year outcome for disability in a working population of patients with low back pain treated in primary care. *Pain*. 2006;122(1-2):137-44.
12. Grotle M. Clinical course and prognostic factors in patients with low back pain and disability: a methodological and clinical study.: University of Oslo; 2004.
13. Pincus T, Burton AK, Vogel S, et al. A systematic review of psychological factors as predictors of chronicity/disability in prospective cohorts of low back pain. *Spine*. 2002;27(5):E109-20.
14. Pincus T, Vlaeyen JW, Kendall NA, et al. Cognitive-behavioral therapy and psychosocial factors in low back pain: directions for the future. *Spine*. 2002;27(5):E133-8.
15. Pengel LH, Herbert RD, Maher CG, et al. Acute low back pain: systematic review of its prognosis. *BMJ*. 2003;327(7410):323.
16. Schiottz-Christensen B, Nielsen GL, Hansen VK, et al. Long-term prognosis of acute low back pain in patients seen in general practice: a 1-year prospective follow-up study. *Fam Pract*. 1999;16(3):223-32.
17. WHO. International classification function disability and health 2001 [cited 2013 19 dec]. Available from: <http://www.who.int/classifications/icf/en/>.
18. Hayden JA, Chou R, Hogg-Johnson S, et al. Systematic reviews of low back pain prognosis had variable methods and results: guidance for future prognosis reviews. *J Clin Epidemiol*. 2009;62(8):781-96 e1.
19. Messing K, Stock SR, Tissot F. Should studies of risk factors for musculoskeletal disorders be stratified by gender? Lessons from the 1998 Quebec Health and Social Survey. *Scand J Work, Environ Health*. 2009;35(2):96-112.



- 1
- 2
- 3 20. Chenot JF, Becker A, Leonhardt C, et al. Sex differences in presentation, course, and
- 4 management of low back pain in primary care. *Clin J Pain*. 2008;24(7):578-84.
- 5 21. Bohman T, Alfredsson L, Jensen I, et al. Does a healthy lifestyle behaviour influence
- 6 the prognosis of low back pain among men and women in a general population? A
- 7 population-based cohort study. *BMJ open*. 2014;4(12):e005713.
- 8 22. Hilfiker R, Bachmann LM, Heitz CA, et al. Value of predictive instruments to
- 9 determine persisting restriction of function in patients with subacute non-specific low back
- 10 pain. Systematic review. *Eur Spine J*. 2007;16(11):1755-75.
- 11 23. Grotle M, Foster NE, Dunn KM, et al. Are prognostic indicators for poor outcome
- 12 different for acute and chronic low back pain consulters in primary care? *Pain*.
- 13 2010;151(3):790-7.
- 14 24. Costa Lda C, Maher CG, McAuley JH, et al. Prognosis for patients with chronic low
- 15 back pain: inception cohort study. *BMJ*. 2009;339:b3829.
- 16 25. Hayden JA, Dunn KM, van der Windt DA, et al. What is the prognosis of back pain?
- 17 *Best Pract Res Clin Rheumatol*. 2010;24(2):167-79.
- 18 26. Verkerk K, Luijsterburg PA, Miedema HS, et al. Prognostic Factors for Recovery in
- 19 Chronic Nonspecific Low Back Pain: A Systematic Review. *Phys Ther*. 2012.
- 20 27. Nordeman L, Gunnarsson R, Mannerkorpi K. Prognostic factors for work ability in
- 21 women with chronic low back pain consulting primary health care: a 2-year prospective
- 22 longitudinal cohort study. *Clin J Pain*. 2014;30(5):391-8.
- 23 28. Nordeman L, Gunnarsson R, Mannerkorpi K. Prevalence and characteristics of
- 24 widespread pain in female primary health care patients with chronic low back pain. *Clin J*
- 25 *Pain*. 2012;28(1):65-72.
- 26 29. Bush K, Kivlahan DR, McDonell MB, et al. The AUDIT alcohol consumption
- 27 questions (AUDIT-C): an effective brief screening test for problem drinking. Ambulatory
- 28 Care Quality Improvement Project (ACQUIP). Alcohol Use Disorders Identification Test.
- 29 *Arch Intern Med*. 1998;158(16):1789-95.
- 30 30. Akerstedt T, Knutsson A, Westerholm P, et al. Sleep disturbances, work stress and work
- 31 hours: a cross-sectional study. *J Psychosom Res*. 2002;53(3):741-8.
- 32 31. Nyström C, Nyström O. [Skattad stress verifierar fysiska stressymtom] Estimated stress
- 33 verifies autonomic dysfunction. *Läkartidningen*. 1996;93:2583-4.
- 34 32. Ericsson A, Nystrom C, Mannerkorpi K. Psychometric properties of the Stress and
- 35 Crisis Inventory (SCI-93) in females with fibromyalgia and chronic widespread pain. *Nord J*
- 36 *Psychiatry*. 2015;69(1):28-34.
- 37 33. Kraft B NC, Nyström O, Pedersen C. Stressreaktion och välfärdsdata - en
- 38 populationsstudie (in Swedish) [Stress reactions and welfare data - A population study].
- 39 *Socialmedicinsk Tidskrift*. 2004;(3):222-9.
- 40 34. Mannerkorpi K, Hernelid C. Leisure Time Physical Activity Instrument and Physical
- 41 Activity at Home and Work Instrument. Development, face validity, construct validity and
- 42 test-retest reliability for subjects with fibromyalgia. *Disabil Rehabil*. 2005;27(12):695-701.
- 43 35. Pankoff BA, Overend TJ, Lucy SD, et al. Reliability of the six-minute walk test in
- 44 people with fibromyalgia. *Arthritis Care Res*. 2000;13(5):291-5.
- 45 36. King S, Wessel J, Bhambhani Y, et al. Validity and reliability of the 6 minute walk in
- 46 persons with fibromyalgia. *J Rheumatol*. 1999;26(10):2233-7.
- 47 37. Harding VR, Williams AC, Richardson PH, et al. The development of a battery of
- 48 measures for assessing physical functioning of chronic pain patients. *Pain*. 1994;58(3):367-
- 49 75.
- 50 38. Mannerkorpi K, Svantesson U, Broberg C. Relationships between performance-based
- 51 tests and patients' ratings of activity limitations, self-efficacy, and pain in fibromyalgia. *Arch*
- 52 *Phys Med Rehabil*. 2006;87(2):259-64.
- 53
- 54
- 55
- 56
- 57
- 58
- 59
- 60

- 1  
2  
3 39. Nordenskiöld UM, Grimby G. Grip force in patients with rheumatoid arthritis and  
4 fibromyalgia and in healthy subjects. A study with the Grippit instrument. *Scand J*  
5 *Rheumatol.* 1993;22(1):14-9.
- 6 40. Bergman S, Herrstrom P, Hogstrom K, et al. Chronic musculoskeletal pain, prevalence  
7 rates, and sociodemographic associations in a Swedish population study. *J Rheumatol.*  
8 2001;28(6):1369-77.
- 9 41. Lisspers J, Nygren A, Soderman E. Hospital Anxiety and Depression Scale (HAD):  
10 some psychometric data for a Swedish sample. *Acta Psychiatr Scand.* 1997;96(4):281-6.
- 11 42. Zigmond AS, Snaith RP. The hospital anxiety and depression scale. *Acta Psychiatr*  
12 *Scand.* 1983;67(6):361-70.
- 13 43. Johansson E, Lindberg P. Subacute and chronic low back pain. Reliability and validity  
14 of a Swedish version of the Roland and Morris Disability Questionnaire. *Scand J Rehabil*  
15 *Med.* 1998;30(3):139-43.
- 16 44. Linton SJ, Halldén K, Hellsing A-L. The reliability of self-reported sick absenteeism a  
17 pilot study. 1995;24:145-50.
- 18 45. Gjesfjeld C, Greeno C, Kim K. A Confirmatory Factor Analysis of an Abbreviated  
19 Social Support Instrument: The MOS-SSS. *Research on Social Work Practice.* 2008;18:231-7
- 20 46. Sullivan M, Karlsson J. The Swedish SF-36 Health Survey III. Evaluation of criterion-  
21 based validity: results from normative population. *J Clin Epidemiol.* 1998;51(11):1105-13.
- 22 47. Sullivan M, Karlsson J, Ware JE, Jr. The Swedish SF-36 Health Survey--I. Evaluation  
23 of data quality, scaling assumptions, reliability and construct validity across general  
24 populations in Sweden. *Soc Sci Med.* 1995;41(10):1349-58.
- 25 48. Persson LO, Karlsson J, Bengtsson C, et al. The Swedish SF-36 Health Survey II.  
26 Evaluation of clinical validity: results from population studies of elderly and women in  
27 Gothenburg. *J Clin Epidemiol.* 1998;51(11):1095-103.
- 28 49. Blom G. Statistical estimates and transformed beta variables. New York: John Wiley  
29 and Sons, 1958.
- 30 50. WHO. BMI classification [cited 15 July 2015] [Available at  
31 [http://apps.who.int/bmi/index.jsp?introPage=intro\\_3.html](http://apps.who.int/bmi/index.jsp?introPage=intro_3.html) ]
- 32 51. Andersson HI, Ejlertsson G, Leden I, et al. Chronic pain in a geographically defined  
33 general population: studies of differences in age, gender, social class, and pain localization.  
34 *Clin J Pain.* 1993;9(3):174-82.
- 35 52. Pincus T, Santos R, Breen A, et al. A review and proposal for a core set of factors for  
36 prospective cohorts in low back pain: a consensus statement. *Arthritis Rheum.* 2008;59(1):14-  
37 24.
- 38 53. Deyo RA, Battie M, Beurskens AJ, et al. Outcome measures for low back pain research.  
39 A proposal for standardized use. *Spine.* 1998;23(18):2003-13.
- 40 54. Smeets R, Koke A, Lin CW, et al. Measures of function in low back pain/disorders:  
41 Low Back Pain Rating Scale (LBPRS), Oswestry Disability Index (ODI), Progressive  
42 Isoinertial Lifting Evaluation (PILE), Quebec Back Pain Disability Scale (QBPDs), and  
43 Roland-Morris Disability Questionnaire (RDQ). *Arthritis care & research.* 2011;63 Suppl  
44 11:S158-73.
- 45 55. Sigl T, Cieza A, Brockow T, et al. Content comparison of low back pain-specific  
46 measures based on the International Classification of Functioning, Disability and Health  
47 (ICF). *Clin J Pain.* 2006;22(2):147-53.
- 48 56. Grotle M, Brox JI, Vollestad NK. Functional status and disability questionnaires: what  
49 do they assess? A systematic review of back-specific outcome questionnaires. *Spine.*  
50 2005;30(1):130-40.
- 51  
52  
53  
54  
55  
56  
57  
58  
59  
60

- 1  
2  
3 57. Lee CE, Simmonds MJ, Novy DM, et al. Self-reports and clinician-measured physical  
4 function among patients with low back pain: a comparison. *Arch Phys Med Rehabil*.  
5 2001;82(2):227-31.  
6 58. Mannerkorpi K, Nordeman L, Ericsson A, et al. Pool exercise for patients with  
7 fibromyalgia or chronic widespread pain: a randomized controlled trial and subgroup  
8 analyses. *J Rehabil Med*. 2009;41(9):751-60.  
9 59. Wilkens P, Scheel IB, Grundnes O, et al. Prognostic factors of prolonged disability in  
10 patients with chronic low back pain and lumbar degeneration in primary care: a cohort study.  
11 *Spine*. 2013;38(1):65-74.  
12 60. WHO. Global Strategy on Diet, Physical Activity and Health: Physical Activity and  
13 Adults. Available from: [http://www.who.int/dietphysicalactivity/factsheet\\_adults/en/](http://www.who.int/dietphysicalactivity/factsheet_adults/en/).  
14 61. Grotle M, Brox JI, Veierod MB, et al. Clinical course and prognostic factors in acute  
15 low back pain: patients consulting primary care for the first time. *Spine*. 2005;30(8):976-82.  
16 62. Ellegaard H, Pedersen BD. Stress is dominant in patients with depression and chronic  
17 low back pain. A qualitative study of psychotherapeutic interventions for patients with non-  
18 specific low back pain of 3-12 months' duration. *BMC musculoskeletal disorders*.  
19 2012;13:166.  
20  
21  
22  
23  
24  
25  
26  
27  
28  
29  
30  
31  
32  
33  
34  
35  
36  
37  
38  
39  
40  
41  
42  
43  
44  
45  
46  
47  
48  
49  
50  
51  
52  
53  
54  
55  
56  
57  
58  
59  
60

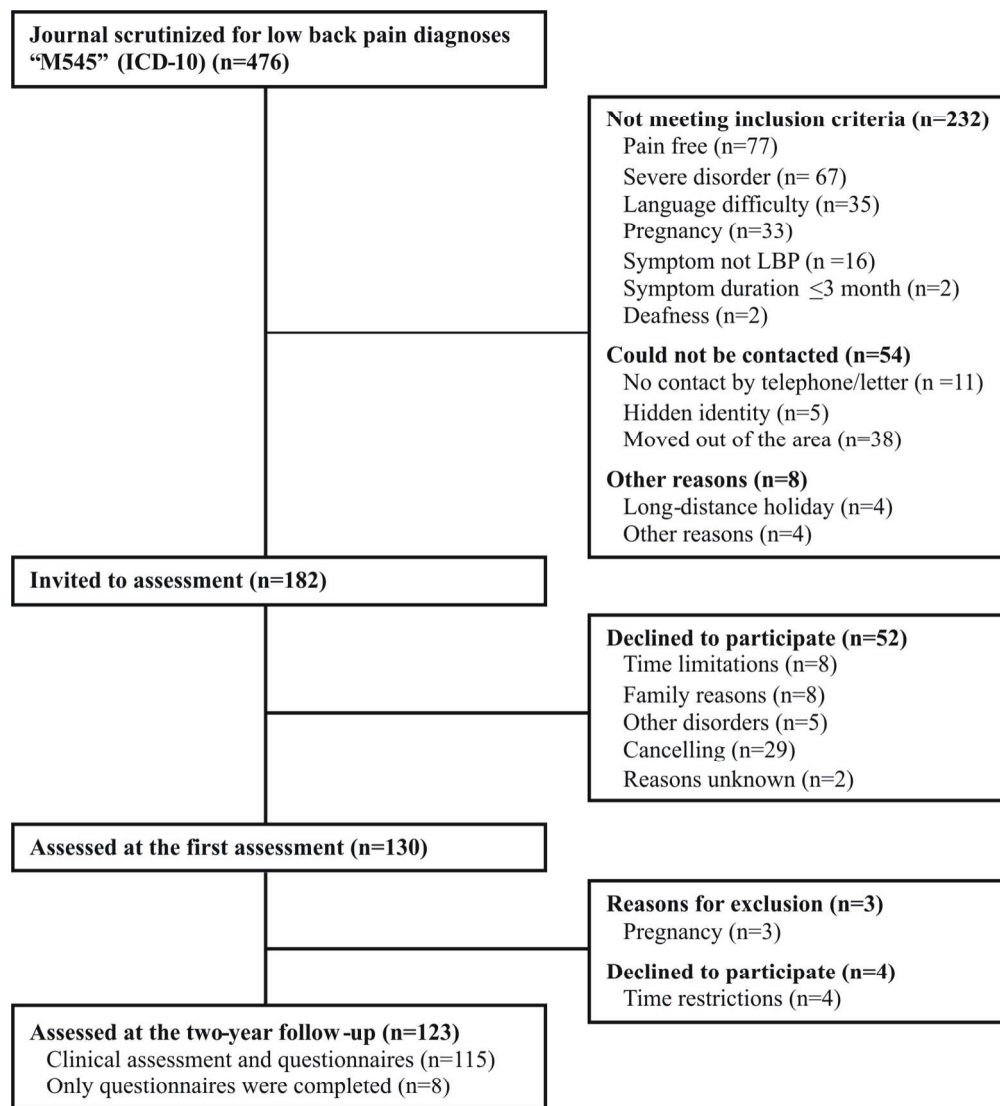

Figure 1. Participants flow.

Figure 1. Participants flow

150x177mm (300 x 300 DPI)

STROBE 2007 (v4) Statement—Checklist of items that should be included in reports of *cohort studies*

| Section/Topic                | Item # | Recommendation                                                                                                                                                                       | Reported on page #                             |
|------------------------------|--------|--------------------------------------------------------------------------------------------------------------------------------------------------------------------------------------|------------------------------------------------|
| Title and abstract           | 1      | (a) Indicate the study's design with a commonly used term in the title or the abstract                                                                                               | Noted in Title page and Abstract.<br>Pages 1,2 |
|                              |        | (b) Provide in the abstract an informative and balanced summary of what was done and what was found                                                                                  | Pages 2,3                                      |
| <b>Introduction</b>          |        |                                                                                                                                                                                      |                                                |
| Background/rationale         | 2      | Explain the scientific background and rationale for the investigation being reported                                                                                                 | Pages 5,6                                      |
| Objectives                   | 3      | State specific objectives, including any prespecified hypotheses                                                                                                                     | Page 6                                         |
| <b>Methods</b>               |        |                                                                                                                                                                                      |                                                |
| Study design                 | 4      | Present key elements of study design early in the paper                                                                                                                              | Pages 6,7                                      |
| Setting                      | 5      | Describe the setting, locations, and relevant dates, including periods of recruitment, exposure, follow-up, and data collection                                                      | Page 7                                         |
| Participants                 | 6      | (a) Give the eligibility criteria, and the sources and methods of selection of participants. Describe methods of follow-up                                                           | Pages 6,7                                      |
|                              |        | (b) For matched studies, give matching criteria and number of exposed and unexposed                                                                                                  | NA                                             |
| Variables                    | 7      | Clearly define all outcomes, exposures, predictors, potential confounders, and effect modifiers. Give diagnostic criteria, if applicable                                             | Pages 7-10                                     |
| Data sources/<br>measurement | 8*     | For each variable of interest, give sources of data and details of methods of assessment (measurement). Describe comparability of assessment methods if there is more than one group | Pages 7-10                                     |
| Bias                         | 9      | Describe any efforts to address potential sources of bias                                                                                                                            | Page 11                                        |
| Study size                   | 10     | Explain how the study size was arrived at                                                                                                                                            | Page 7                                         |
| Quantitative variables       | 11     | Explain how quantitative variables were handled in the analyses. If applicable, describe which groupings were chosen and why                                                         | Pages 10,11                                    |
| Statistical methods          | 12     | (a) Describe all statistical methods, including those used to control for confounding                                                                                                | Pages 10,11                                    |
|                              |        | (b) Describe any methods used to examine subgroups and interactions                                                                                                                  | Pages 10,11                                    |
|                              |        | (c) Explain how missing data were addressed                                                                                                                                          | Page 12 and Figure 1<br>(at page 27)           |

|                   |     |                                                                                                                                                                                                              |                                                                    |
|-------------------|-----|--------------------------------------------------------------------------------------------------------------------------------------------------------------------------------------------------------------|--------------------------------------------------------------------|
|                   |     | (d) If applicable, explain how loss to follow-up was addressed                                                                                                                                               | Page 12 and Figure 1 (at page 27)                                  |
|                   |     | (e) Describe any sensitivity analyses                                                                                                                                                                        | NA                                                                 |
| <b>Results</b>    |     |                                                                                                                                                                                                              |                                                                    |
| Participants      | 13* | (a) Report numbers of individuals at each stage of study—eg numbers potentially eligible, examined for eligibility, confirmed eligible, included in the study, completing follow-up, and analysed            | Page 12 and Figure 1 (at page 27)                                  |
|                   |     | (b) Give reasons for non-participation at each stage                                                                                                                                                         | Page 12 and Figure 1 (at page 27)                                  |
|                   |     | (c) Consider use of a flow diagram                                                                                                                                                                           | Figure 1 (at page 27)                                              |
| Descriptive data  | 14* | (a) Give characteristics of study participants (eg demographic, clinical, social) and information on exposures and potential confounders                                                                     | Page 12 and Tables 1,2 at pages 13,14                              |
|                   |     | (b) Indicate number of participants with missing data for each variable of interest                                                                                                                          | Tables 1,2 at pages 13,14                                          |
|                   |     | (c) Summarise follow-up time (eg, average and total amount)                                                                                                                                                  | Follow-up time is two years, documented throughout the manuscript. |
| Outcome data      | 15* | Report numbers of outcome events or summary measures over time                                                                                                                                               | Page 15 and Table 3 at page 16                                     |
| Main results      | 16  | (a) Give unadjusted estimates and, if applicable, confounder-adjusted estimates and their precision (eg, 95% confidence interval). Make clear which confounders were adjusted for and why they were included | Page 11, 15 and Table 3 at page 16                                 |
|                   |     | (b) Report category boundaries when continuous variables were categorized                                                                                                                                    | NA                                                                 |
|                   |     | (c) If relevant, consider translating estimates of relative risk into absolute risk for a meaningful time period                                                                                             | NA                                                                 |
| Other analyses    | 17  | Report other analyses done—eg analyses of subgroups and interactions, and sensitivity analyses                                                                                                               | NA                                                                 |
| <b>Discussion</b> |     |                                                                                                                                                                                                              |                                                                    |
| Key results       | 18  | Summarise key results with reference to study objectives                                                                                                                                                     | Page 17                                                            |
| Limitations       | 19  | Discuss limitations of the study, taking into account sources of potential bias or imprecision. Discuss both direction and magnitude of any potential bias                                                   | Pages 17,18                                                        |
| Interpretation    | 20  | Give a cautious overall interpretation of results considering objectives, limitations, multiplicity of analyses, results from similar studies, and other relevant evidence                                   | Pages 17-20                                                        |

|                          |    |                                                                                                                                                               |             |
|--------------------------|----|---------------------------------------------------------------------------------------------------------------------------------------------------------------|-------------|
| Generalisability         | 21 | Discuss the generalisability (external validity) of the study results                                                                                         | Pages 17-20 |
| <b>Other information</b> |    |                                                                                                                                                               |             |
| Funding                  | 22 | Give the source of funding and the role of the funders for the present study and, if applicable, for the original study on which the present article is based | Page 21     |

\*Give information separately for cases and controls in case-control studies and, if applicable, for exposed and unexposed groups in cohort and cross-sectional studies.

**Note:** An Explanation and Elaboration article discusses each checklist item and gives methodological background and published examples of transparent reporting. The STROBE checklist is best used in conjunction with this article (freely available on the Web sites of PLoS Medicine at <http://www.plosmedicine.org/>, Annals of Internal Medicine at <http://www.annals.org/>, and Epidemiology at <http://www.epidem.com/>). Information on the STROBE Initiative is available at [www.strobe-statement.org](http://www.strobe-statement.org).

# BMJ Open

## Predictors for future activity limitation in women with chronic low back pain consulting primary care: a two-year prospective longitudinal cohort study

|                                 |                                                                                                                                                                                                                                                                                                                                                                                                                                                                                                                                                                                                                                                         |
|---------------------------------|---------------------------------------------------------------------------------------------------------------------------------------------------------------------------------------------------------------------------------------------------------------------------------------------------------------------------------------------------------------------------------------------------------------------------------------------------------------------------------------------------------------------------------------------------------------------------------------------------------------------------------------------------------|
| Journal:                        | <i>BMJ Open</i>                                                                                                                                                                                                                                                                                                                                                                                                                                                                                                                                                                                                                                         |
| Manuscript ID                   | bmjopen-2016-013974.R1                                                                                                                                                                                                                                                                                                                                                                                                                                                                                                                                                                                                                                  |
| Article Type:                   | Research                                                                                                                                                                                                                                                                                                                                                                                                                                                                                                                                                                                                                                                |
| Date Submitted by the Author:   | 29-Dec-2016                                                                                                                                                                                                                                                                                                                                                                                                                                                                                                                                                                                                                                             |
| Complete List of Authors:       | Nordeman, Lena; Närhälsan Research and Development Primary Health Care, Region Västra Götaland, Research and Development Center Södra Älvsborg; Göteborgs universitet Sahlgrenska Akademin, Institute of Neuroscience and Physiology, Department of Health and Rehabilitation, Unit of Physiotherapy<br>Thorselius, Lena; Närhälsan, Health Unit, Primary Health Care<br>Gunnarsson, Ronny; James Cook University College of Medicine and Dentistry, Cairns Clinical School<br>Mannerkorpi, Kaisa; Göteborgs universitet Sahlgrenska Akademin, Institute of Neuroscience and Physiology, Department of Health and Rehabilitation, Unit of Physiotherapy |
| <b>Primary Subject Heading</b>: | General practice / Family practice                                                                                                                                                                                                                                                                                                                                                                                                                                                                                                                                                                                                                      |
| Secondary Subject Heading:      | Rehabilitation medicine                                                                                                                                                                                                                                                                                                                                                                                                                                                                                                                                                                                                                                 |
| Keywords:                       | chronic pain, low back pain, PRIMARY CARE, Life style, disability                                                                                                                                                                                                                                                                                                                                                                                                                                                                                                                                                                                       |
|                                 |                                                                                                                                                                                                                                                                                                                                                                                                                                                                                                                                                                                                                                                         |

SCHOLARONE™  
Manuscripts



1  
2  
3 **Predictors for future activity limitation in women with chronic low back**  
4 **pain consulting primary care: a two-year prospective longitudinal cohort**  
5 **study**  
6  
7  
8  
9

10  
11  
12  
13 Lena Nordeman PhD RPT<sup>a,b</sup>, Lena Thorselius BCs RPT<sup>c</sup>, Ronny Gunnarsson assoc prof  
14  
15 MD<sup>a,d,e</sup>, Kaisa Mannerkorpi prof. RPT<sup>b</sup>  
16

17 *<sup>a</sup>Närhälsan, Research and Development Primary Health Care Region Västra Götaland, Research and*  
18 *Development Center Södra Älvsborg, Sweden; <sup>b</sup>University of Gothenburg, Sahlgrenska Academy, Institute of*  
19 *Neuroscience and Physiology, Department of Health and Rehabilitation, Unit of Physiotherapy, Sweden;*  
20 *<sup>c</sup>Närhälsan, Health Unit, Primary Health Care Region Västra Götaland, Sweden; <sup>d</sup>University of Gothenburg,*  
21 *Sahlgrenska Academy, Institute of Medicine, Department of Public Health and Community Medicine, Sweden;*  
22 *<sup>e</sup>Cairns clinical school, College of Medicine and Dentistry, James Cook University, Australia*  
23  
24  
25  
26

27 **Word count** (excluding title page, abstract, references, figures and tables): **3295**  
28

29 **Word count** (abstract): **300**  
30

31 **Table count:** **4**  
32

33 **Figure count:** **1**  
34

35 **References:** **65**  
36  
37  
38  
39

40 **Corresponding author**

41 Lena Nordeman

42  
43 Närhälsan, Research and Development Primary Health Care  
44 Region Västra Götaland

45  
46 Research and Development Center Södra Älvsborg

47  
48 Sven Eriksonsplatsen 4, S-503 38 Borås, Sweden

49  
50 Switchboard: +46 10-43 59 410

51  
52 Mobile: +46-70-171 44 63

53  
54 E-mail: [lena.nordeman@vgregion.se](mailto:lena.nordeman@vgregion.se)  
55  
56  
57  
58  
59  
60

## ABSTRACT

**Objectives.** To assess if body function, activity, participation, health-related quality of life and lifestyle behavioral factors can predict activity limitation in women with chronic low back pain (CLBP) in primary health care (PHC) two years later.

**Design.** A two-year prospective longitudinal cohort study within PHC.

**Settings:** Primary health care in south-western Sweden.

**Participants:** The cohort comprised 130 women with CLBP attending PHC at baseline 2004-2005 and were re-assessed after two years.

**Measures.** The dependent outcome variable was self-reported activity limitation (Roland Morris disability questionnaire (RMDQ)) at two-year follow-up. Independent predictors at baseline were age, BMI, smoking, alcohol consumption, sleep quantity and quality, leisure time physical activity, a questionnaire of clinical manifestation of stress (Stress and Crises Inventory (SCI-93)), pain localisation, pain intensity, fatigue, anxiety, depression, RMDQ, work status, private social support, health-related quality of life and measures of physical performance specified as six-minute walk test (6MWT) and hand grip strength. Relation between baseline predictors and variation in later self-reported activity limitation (RMDQ) was analysed using multivariate linear regression.

**Results.** Ninety-five percent (n=123/130) were followed up after two years. The participants were middle-aged (mean 45 (SD10) years), mostly educated more than 9 years (88%;108/123), mainly living with another adult (76%;93/122) and born in Sweden (90%;111/123). Seventy-nine percent (97/123) were categorized as having work ability at baseline. The final prognostic model including 6MWT, SCI-93 and RMDQ at baseline explained 54% of the variance in self-reported activity limitation (RMDQ) at the two-year follow-up.

**Conclusions:** Lower physical performance, more severe clinical stress symptoms and more

1  
2  
3 severe activity limitation predicted activity limitation after two years in women with CLBP  
4  
5 within PHC. The results can give guidance for interventional trials aiming to improve  
6  
7 physical capacity and decrease stress. The impact of the interaction between prognostic  
8  
9 factors and interventions on activity limitation, needs further investigation.  
10  
11

12  
13  
14  
15  
16 **Key Words:** Chronic Pain, Low Back Pain, Primary Health Care, Life Style, Disability  
17  
18 Evaluation, Prognostic Factors, Women.  
19  
20  
21  
22  
23  
24  
25  
26  
27  
28  
29  
30  
31  
32  
33  
34  
35  
36  
37  
38  
39  
40  
41  
42  
43  
44  
45  
46  
47  
48  
49  
50  
51  
52  
53  
54  
55  
56  
57  
58  
59  
60

### Strengths and limitations of this study

- The main strength of this study is the longitudinal prospective design over two years within primary health care, high long-term follow up (95%), measurements representing all the domains of International Classification of Functioning, Disability and health (ICF) complemented with lifestyle behavioural factors.
- The limitation of this study is the small sample size and that we included only women which limits the generalizability to men.

## INTRODUCTION

Non-specific chronic low back pain (CLBP), defined as pain duration longer than three months, is associated with variations of recurrent or persistent pain.<sup>1,2</sup> CLBP have various impact on body functions, activity and participation in daily life<sup>1-4</sup> and it is a common cause for attending health care.<sup>1</sup>

Non-specific acute low back pain (LBP) is described to have a spontaneous course.<sup>1,2,5</sup> However, after one year 63-82% of primary care patients with LBP report to have recurrent LBP and 20-45% impaired function.<sup>6-10</sup> Prognostic factors for the transition from non-specific acute LBP to CLBP has previously been described in personal and socioeconomic areas as well as in all domains of the International Classification of Functioning, Disability and Health (ICF).<sup>6,9,11-18</sup> Women seems to have a greater risk for CLBP<sup>6</sup> and when studying prognostic factors it is suggested to assess women separately.<sup>19-21</sup> Previous prognostic models for the transition to CLBP explain 28-51% of variability in the measured outcome.<sup>22</sup> The outcomes, combination of included prognostic factors and statistical analyses often differs between studies, making comparisons or meta-analysis difficult.<sup>18</sup>

Some studies have described similar prognostic factors for persistent CLBP as for the transition from non-specific acute LBP to CLBP.<sup>23,24</sup> Since the course of non-specific acute LBP and CLBP differs, more knowledge of prognostic factors for varying outcomes in patients with CLBP is warranted.<sup>25</sup> A previous review studying prognostic factors for delayed recovery in CLBP found no association between age, sex and the outcome measure of pain intensity and disability at short-term follow-up (e.g. 6-weeks). Conflicting evidence was found for fear of avoidance as a predictor.<sup>26</sup> At long-term follow-up (e.g. 6 months) no association was found between smoking, pain intensity, fear of avoidance and the dependent variable disability.<sup>26</sup> Conflicting evidence was found for age, sex and physical job demands and the outcome measure of pain intensity and disability. Moreover, conflicting evidence was

1  
2  
3 found for the association between age, activities of daily living, pain intensity and physical  
4 job demand and the outcome return to work.<sup>26</sup> However, recently a study showed that a  
5 physical performance test (6-minute walk test), depression and earlier work ability predicted  
6  
7 later work ability in women with CLBP.<sup>27</sup>  
8  
9  
10

11  
12 The knowledge about various prognostic factors for the recovery in the long-term for  
13 patients with CLBP is still insufficient. This study is an extended analysis of the material from  
14 the two-year longitudinal cohort study of prognostic factors for work ability in women with  
15 CLBP<sup>27</sup>. The present study aim to focus on the prognostic value of lifestyle behavioral  
16 factors, stress symptoms and physical performance for future activity limitation using the  
17 same material and measurements.  
18  
19  
20  
21  
22  
23  
24  
25  
26

27 The aim was to assess if body function, activity, participation, health-related quality of life  
28 and lifestyle behavioral factors can predict the future variance of self-rated activity limitation  
29 in women with CLBP in PHC two years later.  
30  
31  
32  
33  
34  
35  
36  
37  
38

## 39 **METHODS**

### 40 **Study design**

41 This two-year prospective longitudinal cohort study included women (n=130) with CLBP  
42 within PHC.<sup>28</sup> Patients were assessed at baseline and were re-assessed after two years.  
43  
44 Predictors for later self-reported activity limitation (Roland Morris disability questionnaire  
45 (RMDQ)), was analysed by multivariate linear regression. Independent variables found to be  
46 associated with disability in CLBP patients,<sup>27</sup> were complemented with lifestyle behavioural  
47 factors including Body Mass Index (BMI), smoking, alcohol consumption, sleep quantity and  
48 quality, leisure time physical activity and a questionnaire of the clinical manifestation of  
49  
50  
51  
52  
53  
54  
55  
56  
57  
58  
59  
60

1  
2  
3 stress. Other independent variables related to chronic pain were pain localisation, pain  
4  
5 intensity, fatigue, anxiety, depression, work status, private social support health-related  
6  
7 quality of life and two measures of physical performance.  
8

9  
10 Participants were assessed by a trained physical therapist in PHC both at baseline and after  
11  
12 two years and included a structured interview, measure of body height and weight, and the  
13  
14 two physical performance tests. Participants were asked to fill in a package of self-  
15  
16 administrated questionnaires at the assessment and two at home. They were provided with a  
17  
18 pre-paid addressed envelope to return questionnaires. If no questionnaires were returned  
19  
20 within two weeks, a reminder by telephone was made. The Regional Ethical Review Board in  
21  
22 Gothenburg approved the study. Written informed consent was obtained from all patients.  
23  
24

### 25 26 27 **Selection of patients**

28  
29 Female patients were identified by systematic search in medical charts for LBP diagnoses  
30  
31 “M545” (ICD-10) at eight PHC clinics in south-western Sweden, a mixture of urban and rural  
32  
33 populations, in 2004-2005. All patients who could be contacted, accepting participation and  
34  
35 fulfilling the inclusion criteria were invited to enroll in the study. The inclusion criteria were:  
36  
37 female patient, low back pain (pain between costal margins and gluteal folds) with or without  
38  
39 referred leg pain.<sup>1</sup> Further inclusion criteria were; longer than 12-week’s duration of  
40  
41 symptoms, not pregnant, no known spinal pathology, no other severe co-morbidity (e.g.  
42  
43 cancer, fracture, stroke, severe psychiatric disorders, mental retardation), age between 18 and  
44  
45 60 years, understanding and fluent in Swedish. At the two-year follow-up, all patients  
46  
47 included in the cross-sectional study (n=130),<sup>28</sup> who could be contacted and accepting  
48  
49 participation were invited to the follow-up, containing the same study protocol as at baseline.  
50  
51  
52  
53  
54  
55  
56  
57  
58  
59  
60

## Measurements

The structured interview included questions about age, nationality, education level, family situation, work status, back pain history (onset, duration and symptoms), co-morbidity and pharmacological treatment.

### *1. Lifestyle behavioural factors*

#### *1.1 Body Mass Index (BMI)*

Height and weight were assessed for calculating the BMI ( $\text{kg/m}^2$ ).

#### *1.2 Alcohol consumption*

For alcohol consumption the Alcohol Use Disorders Identification Test (Audit-C)<sup>29</sup> was used (range 0-12). Higher scores indicate higher alcohol consumption.

#### *1.3 Smoking*

Tobacco use was dichotomized into two categories, No smoker or smoker. The category, no smoker required to never been smoking. The category smoker required to previously been a smoker or are reported to be currently smoking.

#### *1.4 Sleep*

For sleep quantity and quality two questions was used.<sup>30</sup> “Do you think you get enough sleep?” (range 1-4) and “On the whole, how do you think you sleep?”(range 1-4). Higher score indicate better sleep quantity and quality.

#### *1.5 Stress symptoms*



1  
2  
3 To quantify clinical manifestations of stress symptoms the Stress and Crises Inventory (SCI-  
4  
5 93) was used (range 0-140) where higher scores indicate more severe clinical stress  
6  
7 symptoms.<sup>31, 32</sup> A total score of  $\leq 38$  indicates normal resources for activity and work.<sup>33</sup>  
8  
9

### 10 11 *1.6 Physical activity at leisure time*

12  
13 The Leisure Time Physical Activity Instrument (LTPAI) was used to assess the amount of  
14  
15 physical activity in leisure time during a typical week.<sup>34</sup> The number of hours spent for light,  
16  
17 moderate and vigorous activities was registered and the total number of hours were used.<sup>34</sup>  
18  
19

## 20 21 22 *2. Body function*

### 23 24 *2.1 Physical performance tests*

25  
26 The 6-minute walk test (6MWT) was used to assess physical performance.<sup>35-37</sup> The distance  
27  
28 (meter) is measured while the patient walks up and down a 30 meter corridor for 6 minutes.  
29  
30 The participant was instructed to walk as quickly as possible without running.  
31  
32

33  
34 Hand grip strength was measured with an electronic instrument Grippit<sup>®</sup>.<sup>38, 39</sup> A sustained  
35  
36 voluntary 10-second contraction was measured. The right hand value was used for analyses in  
37  
38 the present study.  
39  
40

### 41 42 *2.2 Number of pain localisation, pain intensity and fatigue*

43  
44 For pain distribution, a drawing of the body was used for register pain localisations (0-18).<sup>40</sup>  
45  
46 Pain intensity and fatigue during the last week was measured on a visual analogue scale 0-100  
47  
48 mm (VAS).  
49  
50

### 51 52 53 *2.3 Distress*

1  
2  
3 The Hospital Anxiety and Depression Scale (HADS), HADS-A was used for assessment of  
4 anxiety, (range 0-21) and the HADS-D for depression (range 0-21). Higher scores indicate  
5 greater anxiety or depression.<sup>41, 42</sup>  
6  
7  
8  
9

### 10 11 12 *3. Activity limitations*

13  
14 The RMDQ was used for self-reported activity limitation related to LBP. The RMDQ consists  
15 of 24 yes/no statements, where higher scores indicate greater activity limitation (range 0-24).  
16  
17  
18  
19  
20  
21  
22  
23  
24  
25  
26  
27  
28  
29  
30  
31  
32  
33  
34  
35  
36  
37  
38  
39  
40  
41  
42  
43  
44  
45  
46  
47  
48  
49  
50  
51  
52  
53  
54  
55  
56  
57  
58  
59  
60

### *4. Participation*

Work status was dichotomized into two categories, work ability or not. The category, work ability required work or study, full or part-time, applying for work, parental leave full or part-time or part-time disability pension. The category no work ability required full-time sick leave or full-time disability pension. Self-reported sick absenteeism has been shown reliable.<sup>44</sup>

### *5. Environmental factors*

The 4-item version of Medical Outcome Study Social Support Survey (MOS-SSS) registered private social support: emotional-informational, tangible, affectionate support and positive social interaction (range 1-5 for each item). Higher scores indicate more support (total range 4-20).<sup>45</sup>

### *6. Health-related quality of life*

The SF-36 short form health survey (SF-36) was used for general health status. The Physical Component Summary score (PCS) and the Mental Component Summary score (MCS) representing an overall health index of physical or mental health (range 0-100) were used.<sup>46-48</sup>

### Statistical analysis

Group characteristics are presented as mean and standard deviations (SD), median and 25<sup>th</sup> and 75<sup>th</sup> percentile or the number and percentage at baseline. Percentages change for RMDQ was constructed by subtracting baseline value from two-year follow-up value. The change was divided with baseline and multiplied by 100 to create a percentage change.

To enable more meaningful clinical interpretation small units were transformed to larger ones. In 6MWT one meter was transformed to 100 meter, in hand grip strength one Newton was transformed to 50 Newton, in the pain and fatigue scores, one mm was transformed to 10 mm (VAS).

Spearman Rank correlation between RMDQ at two years and each of the independent variables at baseline was performed to evaluate independent variables and reduce the number of independent variables of interest. This analyse was also performed between RMDQ percentages change and each of the independent variables at baseline. Independent variables with  $p < 0.20$  were included in next multivariate regression step.

Two forward stepwise multivariate linear regression analysis were performed, one with RMDQ at two years as dependent variable and one with RMDQ percentage change as dependent variable. The independent variables remaining from the first step described above were included.

Prior to the multivariate linear regression, the variables were evaluated for the assumptions of multivariate analysis. The dependent variable RMDQ at two years fulfilled the assumption of normal distribution when ranked using Blom's formula.<sup>49</sup> The statistical criteria for the independent variables were 0.05 for entry and 0.10 for removal. Multi-collinearity was checked by the values of Tolerance and VIF. The final models were adjusted for age as it could be a potential confounding factor, using standard (Enter) multivariate linear regression.

1  
2  
3 The level of significance for independent variables remaining in the final model was set to  
4  
5 0.05. The IBM SPSS Windows version 22.0 was used for the statistical analyses.  
6  
7  
8  
9  
10  
11  
12  
13  
14  
15  
16  
17  
18  
19  
20  
21  
22  
23  
24  
25  
26  
27  
28  
29  
30  
31  
32  
33  
34  
35  
36  
37  
38  
39  
40  
41  
42  
43  
44  
45  
46  
47  
48  
49  
50  
51  
52  
53  
54  
55  
56  
57  
58  
59  
60

For peer review only

## RESULTS

Ninety-five percent (n=123/130) of the participants included in the cross-sectional study<sup>28</sup> could be followed up after two years (Figure 1). Seven patients could not be assessed at the two-year follow-up, three of them due to pregnancy, an exclusion criteria in the present study. The participants were middle-aged (mean 45 (SD10)), mostly educated more than 9 years (88%; 108/123), mainly living with another adult (76%; 93/122) and born in Sweden (90%; 111/123) (Table 1). Seventy-nine percent (97/123) were categorized as having work ability at baseline. The BMI mean and median values of 27 (SD 5.5) and 26 (25<sup>th</sup>;75<sup>th</sup> percentile 23; 29) indicates that a significant proportion were overweight ( $\geq 25$  BMI).<sup>50</sup> Seventy-six percent (n=93/123) were currently non-smokers and did not exceed risk consumption of alcohol (Table 2). Only 14% (17/123) reported sleeping certainly enough and 19% (23/121) reported very good sleep quality (Table 2). Body function, activity, participation and quality of life at baseline indicates that these aspects of life varied and several of them were not optimal (Table 2).

Table 1. Group characteristics at baseline (n=123)

| <b>Personal data</b>                                        |               |
|-------------------------------------------------------------|---------------|
| Age, years [mean (SD)]                                      | 45 (10)       |
| Nationality Swedish [% (n/n)]                               | 90% (111/123) |
| Symptom duration, years [mean (SD)]                         | 9.6 (8.8)     |
| <b>Education status [% ( n/n)]</b>                          |               |
| ≤ 9 years                                                   | 12% (15/123)  |
| 10-12 years                                                 | 40% (49/123)  |
| > 12 years                                                  | 48% (59/123)  |
| <b>Social status [% (n/n)]</b>                              |               |
| Living with an adult                                        | 26% (32/122)  |
| Living with an adult and child/children                     | 50% (61/122)  |
| Living alone                                                | 12% (14/122)  |
| Living alone with child/children                            | 9.0% (11/122) |
| Living apart with an adult                                  | 3.3% (4/122)  |
| <b>Pharmacological treatment, yes [% (n/n)]<sup>a</sup></b> |               |
| Analgesics                                                  | 53% (65/123)  |
| Psychotropic drugs                                          | 16% (20/123)  |
| <b>Employment Status [% (n/n)]</b>                          |               |
| Currently working and/or studying                           | 58% (71/123)  |
| Sick-leave, full-time                                       | 11% (13/123)  |
| Sick-leave, part-time                                       | 8.9% (11/123) |
| Disability pension, full-time                               | 11% (13/123)  |
| Disability pension, part-time                               | 5.7% (7/123)  |
| Parental leave, full-time                                   | 1.6% (2/123)  |
| Parental leave, part-time                                   | 1.6% (2/123)  |
| Unemployed, full-time                                       | 0.81% (1/123) |
| Unemployed, part-time                                       | 2.4% (3/123)  |

<sup>a</sup> The use last month registered by yes or no.

Table 2. Lifestyle factors, body function, activity, participation and health related quality of life at baseline (n=123).

| <b>Lifestyle behavioral factors</b>               |                              |
|---------------------------------------------------|------------------------------|
| Body Mass Index (kg/m <sup>2</sup> ) <sup>a</sup> | 27 (5.5) --- 26 (23; 29)     |
| Audit-C (0-12) <sup>b</sup>                       | 2.2 (1.4) --- 2.0 (1.0; 3.0) |
| Smoking [% (n/n)]                                 |                              |
| never smoked                                      | 40% (49/123)                 |
| previously smoked                                 | 36% (44/123)                 |
| currently smoking                                 | 20% (25/123)                 |
| currently snuffing                                | 4% (5/123)                   |
| Sleep quantity [% (n/n)] <sup>c</sup>             |                              |
| certainly enough                                  | 14% (17/123)                 |
| broadly enough                                    | 47% (58/123)                 |
| some shortage                                     | 24% (29/123)                 |
| clearly insufficient                              | 15% (19/123)                 |
| Sleep quality [% (n/n)] <sup>d</sup>              |                              |
| very good                                         | 19% (23/121)                 |
| quite good                                        | 51% (62/121)                 |
| quite bad                                         | 21% (25/121)                 |
| very bad                                          | 9% (11/121)                  |
| SCI-93 <sup>e</sup>                               | 36 (21) --- 35 (19; 51)      |
| LTPAI, hours per week (n= 122) <sup>f</sup>       | 7.8 (8.5) --- 6.0 (3.4; 9.0) |
| <b>Body function</b>                              |                              |
| Pain localizations (0-18) <sup>g</sup>            | 4.6 (3.2) --- 4.0 (2.0; 6.0) |
| Pain intensity (VAS 0-100 mm) <sup>h</sup>        | 45 (27) --- 45 (24; 68)      |
| Fatigue (VAS 0-100 mm) <sup>h</sup>               | 53 (29) --- 53 (28; 75)      |
| 6MWT (meter) (n=121)                              | 572 (86) --- 581 (515; 633)  |
| Hand grip strength (Newton)                       | 232 (76) --- 237 (184; 285)  |
| HADS-A (0-21) <sup>i</sup>                        | 6.4 (4.4) --- 5.0 (3.0; 9.0) |
| HADS-D (0-21) <sup>i</sup>                        | 4.3 (3.6) --- 3.0 (1.0; 7.0) |
| <b>Activity (n=121)</b>                           |                              |
| RMDQ (0-24) <sup>j</sup>                          | 8.4 (4.8) --- 7.0 (4.0; 12)  |
| <b>Participation</b>                              |                              |
| Work ability (yes) [% (n/n)]                      | 79% (97/123)                 |
| <b>Environmental factors</b>                      |                              |
| Private social support (4-20) <sup>k</sup>        | 16 (3.5) --- 17 (14; 19)     |
| <b>Health-related quality of life (n=122)</b>     |                              |
| PCS (0-100) <sup>l</sup>                          | 38 (9.9) --- 39 (31; 47)     |
| MCS (0-100) <sup>l</sup>                          | 46 (13) --- 49 (37; 56)      |

<sup>a</sup> First figure mean values (standard deviation). Second figure median values (25<sup>th</sup>; 75<sup>th</sup> percentile).

<sup>b</sup> The Alcohol Use Disorders Identification Test (AUDIT-C), 3 items. Higher scores reflect higher alcohol consumption (0-12).

<sup>c</sup> One item: "Do you think you get enough sleep?"

<sup>d</sup> One item: "On the whole, how do you think you sleep?"

<sup>e</sup> Stress and crisis inventory (SCI-93). Higher scores indicate more severe clinical stress symptoms (0-140).

<sup>f</sup> The Leisure Time Physical Activity Instrument (LTPAI) assess the total hours of physical activity in leisure time during a typical week.

<sup>g</sup> Self-reported pain locations registered by a figure with predefined body locations (0-18).

<sup>h</sup> Perceived pain intensity, fatigue over the last week rated on a visual analogue scale, VAS (0-100). Higher values indicate more pain, fatigue.

<sup>i</sup> Hospital Anxiety and Depression Scale (HADS). Higher scores indicate more anxiety (0-21) and depression (0-21).

<sup>j</sup> Roland Morris disability questionnaire (RMDQ) indicates disability related to low back pain (0-24) at baseline. Higher scores indicate more severe disability.

<sup>k</sup> Medical outcome study social support survey (MOS-SSS, 4- item scale) reflects private social support ranging from 1-5. Higher scores reflect more perceived support (4-20).

<sup>l</sup> SF-36. The physical component summary score (PCS) (0-100) and mental component summary score (MCS) (0-100).

### Two-year follow-up RMDQ status

There was a statistically significant mean decrease of 1.9 points (95% CI, 1.2-2.5) on RMDQ from 8.4 (SD 4.8) at baseline to 6.4 (SD 5.5) at the two-year follow-up (-23%,  $p < 0.0001$ ).

### Predictors for activity limitation (RMDQ) at the two-year follow-up

The stepwise multivariate regression analysis showed that the 6MWT, SCI-93 and RMDQ at baseline were the most important predictors explaining 54 % of variance in the RMDQ at the two-year follow-up (Table 3). A model including age, 6MWT and SCI-93 made statistically significant contribution with adjusted  $R^2$  0.39. However, a model including only RMDQ (with or without addition of age) gave an  $R^2$  of 0.51. Models with 6MTW or SCI-93 alone gave  $R^2$  of 0.20 and 0.25 respectively.

There were no significant association between percentage change in RMDQ and any of the independent variables (Table 4).



Table 3. Prognostic factors at baseline for activity limitation at the later two-year follow-up, using the Roland Morris disability Questionnaire (RMDQ) at two-year follow-up (n=120).

|                                                | Spearman Rank Correlation |       |          | Forward stepwise multivariate linear regression <sup>a</sup> |                   |
|------------------------------------------------|---------------------------|-------|----------|--------------------------------------------------------------|-------------------|
|                                                | number                    | r     | p-value  | β (CI 95%)                                                   | p-value           |
| Age, years                                     | 120                       | 0.067 | 0.47     | -0.0048 (-0.019 - 0.010)                                     | 0.51              |
| <b>Lifestyle behavioural factors</b>           |                           |       |          |                                                              |                   |
| Body Mass Index (kg/m <sup>2</sup> )           | 119                       | 0.21  | 0.021    |                                                              |                   |
| Smoker (n=72) --- no smoker (n=48)             | 120                       | 0.14  | 0.14     |                                                              |                   |
| AUDIT-C (0-12) <sup>b</sup>                    | 118                       | -0.23 | 0.011    |                                                              |                   |
| Sleep quantity (1-4) <sup>c</sup>              | 120                       | -0.34 | 0.00014  |                                                              |                   |
| Sleep quality (1-4) <sup>d</sup>               | 118                       | -0.43 | <0.0001  |                                                              |                   |
| SCI-93 <sup>e</sup>                            | 120                       | 0.48  | <0.0001  | <b>0.0091 (0.0023 - 0.016)</b>                               | <b>0.0088</b>     |
| LTPAI, (hours per week) <sup>f</sup>           | 119                       | -0.11 | 0.24     |                                                              |                   |
| <b>Body function</b>                           |                           |       |          |                                                              |                   |
| Pain localisations (0-18) <sup>g</sup>         | 120                       | 0.36  | 0.000052 |                                                              |                   |
| Pain intensity 10 mm (VAS 0-100) <sup>h</sup>  | 120                       | 0.20  | 0.027    |                                                              |                   |
| Fatigue 10 mm (VAS 0-100) <sup>h</sup>         | 120                       | 0.24  | 0.0078   |                                                              |                   |
| 6MWT, 100 meters                               | 118                       | -0.41 | <0.0001  | <b>-0.23 (-0.42 - -0.036)</b>                                | <b>0.020</b>      |
| Hand grip strength 50 N (Newton)               | 120                       | -0.17 | 0.070    |                                                              |                   |
| HADS-A (0-21) <sup>i</sup>                     | 120                       | 0.16  | 0.089    |                                                              |                   |
| HADS-D (0-21) <sup>i</sup>                     | 120                       | 0.37  | 0.000025 |                                                              |                   |
| <b>Activity</b>                                |                           |       |          |                                                              |                   |
| RMDQ at baseline (0-24) <sup>j</sup>           | 118                       | 0.71  | <0.0001  | <b>0.10 (0.068 - 0.14)</b>                                   | <b>&lt;0.0001</b> |
| <b>Participation</b>                           |                           |       |          |                                                              |                   |
| Work ability (n=95) --- no work ability (n=25) | 120                       | -0.37 | 0.000026 |                                                              |                   |
| <b>Environmental factors</b>                   |                           |       |          |                                                              |                   |
| Private social support (4-20) <sup>k</sup>     | 120                       | -0.29 | 0.0013   |                                                              |                   |
| <b>Health-related quality of life</b>          |                           |       |          |                                                              |                   |
| PCS (0-100) <sup>l</sup>                       | 119                       | -0.42 | <0.0001  |                                                              |                   |
| MCS (0-100) <sup>l</sup>                       | 119                       | -0.28 | 0.0022   |                                                              |                   |

<sup>a</sup> Roland Morris disability questionnaire (RMDQ) score was transformed to ranked normal score of RMDQ, using Blom's formula. The final model was adjusted for age, using standard (Enter) multivariate linear regression.

<sup>b</sup> The Alcohol Use Disorders Identification Test (AUDIT-C), 3 items. Higher scores reflect higher alcohol consumption (0-12).

<sup>c</sup> One item: "Do you think you get enough sleep?". Higher scores indicates better sleep (1-4).

<sup>d</sup> One item: "On the whole, how do you think you sleep?". Higher scores indicates better sleep (1-4).

<sup>e</sup> Stress and crisis inventory (SCI-93). Higher scores indicate more severe clinical stress symptoms (0-140).

<sup>f</sup> The Leisure Time Physical Activity Instrument (LTPAI) assess the total hours of physical activity in leisure time during a typical week.

<sup>g</sup> Self-reported pain locations registered by a figure with predefined body locations (0-18).

<sup>h</sup> Perceived pain intensity, fatigue over the last week rated on a visual analogue scale, VAS (0-100). Higher values indicate more pain, fatigue.

<sup>i</sup> Hospital Anxiety and Depression Scale (HADS). Higher scores indicate more anxiety (0-21) and depression (0-21).

<sup>j</sup> Roland Morris disability questionnaire indicates disability related to low back pain (0-24) at baseline. Higher scores indicate more severe disability.

<sup>k</sup> Medical outcome study social support survey (MOS-SSS, 4- item scale) reflects private social support ranging from 1-5. Higher scores reflect more perceived support (4-20).

<sup>l</sup> SF-36. The physical component summary score (PCS) (0-100) and mental component summary score (MCS) (0-100).

Table 4. Prognostic factors at baseline for percentage change in the Roland Morris disability Questionnaire (RMDQ) (n=115).

|                                                | Spearman Rank Correlation |        |         | Forward stepwise multivariate linear regression <sup>a</sup> |         |
|------------------------------------------------|---------------------------|--------|---------|--------------------------------------------------------------|---------|
|                                                | number                    | r      | p-value | β (CI 95%)                                                   | p-value |
| Age, years                                     | 115                       | -0.11  | 0.23    | -0.0017 (-0.014-0.011)                                       | 0.79    |
| <b>Lifestyle behavioural factors</b>           |                           |        |         |                                                              |         |
| Body Mass Index (kg/m <sup>2</sup> )           | 114                       | -0.13  | 0.18    |                                                              |         |
| Smoker (n=72) --- no smoker (n=48)             | 115                       | -0.072 | 0.44    |                                                              |         |
| AUDIT-C (0-12) <sup>b</sup>                    | 113                       | 0.11   | 0.23    |                                                              |         |
| Sleep quantity (1-4) <sup>c</sup>              | 115                       | 0.18   | 0.054   |                                                              |         |
| Sleep quality (1-4) <sup>d</sup>               | 113                       | 0.16   | 0.099   |                                                              |         |
| SCI-93 <sup>e</sup>                            | 115                       | -0.17  | 0.075   |                                                              |         |
| LTPAI (hours per week) <sup>f</sup>            | 115                       | 0.13   | 0.18    |                                                              |         |
| <b>Body function</b>                           |                           |        |         |                                                              |         |
| Pain localisations (0-18) <sup>g</sup>         | 115                       | -0.15  | 0.10    |                                                              |         |
| Pain intensity 10 mm (VAS 0-100) <sup>h</sup>  | 115                       | 0.078  | 0.41    |                                                              |         |
| Fatigue 10 mm (VAS 0-100) <sup>h</sup>         | 115                       | -0.046 | 0.62    |                                                              |         |
| 6MWT, 100 meters                               | 113                       | 0.17   | 0.065   |                                                              |         |
| Hand grip strength 50 N (Newton)               | 115                       | 0.057  | 0.55    |                                                              |         |
| HADS-A (0-21) <sup>i</sup>                     | 115                       | -0.023 | 0.81    |                                                              |         |
| HADS-D (0-21) <sup>i</sup>                     | 115                       | -0.11  | 0.24    |                                                              |         |
| <b>Participation</b>                           |                           |        |         |                                                              |         |
| Work ability (n=95) --- no work ability (n=25) | 115                       | 0.15   | 0.11    |                                                              |         |
| <b>Environmental factors</b>                   |                           |        |         |                                                              |         |
| Private social support (4-20) <sup>j</sup>     | 115                       | 0.14   | 0.14    |                                                              |         |
| <b>Health-related quality of life</b>          |                           |        |         |                                                              |         |
| PCS (0-100) <sup>k</sup>                       | 114                       | 0.029  | 0.76    |                                                              |         |
| MCS (0-100) <sup>k</sup>                       | 114                       | 0.14   | 0.13    |                                                              |         |

<sup>a</sup> Percentage change in RMDQ as dependent variable. The final model was adjusted for age, using standard (Enter) multivariate linear regression.

<sup>b</sup> The Alcohol Use Disorders Identification Test (AUDIT-C), 3 items. Higher scores reflect higher alcohol consumption (0-12).

<sup>c</sup> One item: "Do you think you get enough sleep?". Higher scores indicates better sleep (1-4).

<sup>d</sup> One item: "On the whole, how do you think you sleep?". Higher scores indicates better sleep (1-4).

<sup>e</sup> Stress and crisis inventory (SCI-93). Higher scores indicate more severe clinical stress symptoms (0-140).

<sup>f</sup> The Leisure Time Physical Activity Instrument (LTPAI) assess the total hours of physical activity in leisure time during a typical week.

<sup>g</sup> Self-reported pain locations registered by a figure with predefined body locations (0-18).

<sup>h</sup> Perceived pain intensity, fatigue over the last week rated on a visual analogue scale, VAS (0-100). Higher values indicate more pain, fatigue.

<sup>i</sup> Hospital Anxiety and Depression Scale (HADS). Higher scores indicate more anxiety (0-21) and depression (0-21).

<sup>j</sup> Medical outcome study social support survey (MOS-SSS, 4- item scale) reflects private social support ranging from 1-5. Higher scores reflect more perceived support (4-20).

<sup>k</sup> SF-36. The physical component summary score (PCS) (0-100) and mental component summary score (MCS) (0-100).

## DISCUSSION

This two-year prospective cohort study of women with CLBP attending PHC showed that lower performance in walking capacity (6MWT), more severe clinical stress symptoms (SCI-93) and more severe activity limitation (RMDQ) at baseline predicted more activity limitation (RMDQ) after two years (Table 3). The model with these three predictors explained 54% of the variance in self-reported activity limitation (RMDQ) at the two-year follow-up, which is similar to a previous review of prediction models including various predictors for disability in patients with subacute non-specific LBP.<sup>22</sup>

### Strengths and limitations

This study included measurements representing all the domains of ICF<sup>17</sup> complemented with lifestyle behavioural factors, which is considered as a main strength. The follow-up frequency was very high with 95% being followed up.

Prevalence and predictors of chronic pain have been studied in general populations,<sup>21, 40, 51</sup> while the present study assessed women with CLBP consulting PHC, contributing with knowledge for health care professionals working in PHC. Previous studies found that chronic pain is more common in women, and that women are at greater risk of chronic pain and disability.<sup>6, 40, 51</sup> It has been suggested that women should be assessed separately when studying prognostic factors for LBP,<sup>19, 20</sup> hence the present study included only female patients.

Each independent variable were analysed in a bivariate analysis. The multivariate model was built by using the independent variables with  $p < 0.20$  entered in the model. Physical performance (6MWT) was included in the final model. Knowing that age influences physical

1  
2  
3 performance, age was included as a potential confounder, even though it was not correlated  
4  
5 with RMDQ.  
6  
7

8 We deployed a sorting mechanism (Spearman's rank correlation) to reduce the problem  
9  
10 which may occur when there are few participants relative to the number of independent  
11  
12 variables, before doing the multivariate regression. Hence, the number of participants were  
13  
14 considered to be sufficient for the final model.  
15  
16

17 Prior to the multiple regression, the variables were evaluated for assumptions of  
18  
19 multivariate analysis including checking for multicollinearity and singularity. The values of  
20  
21 Tolerance (0.52-0.74) and VIF (1.3-1.9) were checked indicating low correlation between the  
22  
23 independent variables. Moreover, questionnaires total scores was used to avoid singularity.  
24  
25  
26

27 Self-administrated questionnaires are recommended for the assessment of activity  
28  
29 limitation in patients with LBP.<sup>52</sup> The present study used RMDQ as the outcome measure at  
30  
31 the two-year follow-up. The RMDQ is considered valid, commonly used and recommended in  
32  
33 LBP research for monitoring disability.<sup>53, 54</sup> Seventeen statements in the RMDQ are reported  
34  
35 to be linked to the activity component in the ICF.<sup>55, 56</sup> However, self-reports may suffer from  
36  
37 the fact that some patients may under or overestimate their limitations and physical  
38  
39 performance tests are suggested to complement self-reports.<sup>57</sup> Walk capacity (6MWT) and  
40  
41 hand grip strength, semi-objective measures of body function, were therefore included as  
42  
43 potential predictors in this study.  
44  
45  
46  
47

48 The group showed a moderate grade of disability, RMDQ 8.4 (SD 4.8), at baseline which  
49  
50 might reflect that the women included were not in acute need for treatment when recruited.  
51  
52 There was a statistical significant mean decrease of approximately 2 points on RMDQ during  
53  
54 the two-year period. Minimal clinical detectable change in the RMDQ is considered to be 2 to  
55  
56 3 points. Others have suggested a change of 4 to 5 points to be of clinical value.<sup>53</sup>  
57  
58  
59  
60

### **Predictors for activity limitation (RMDQ) at two-year follow-up**

The BMI values corresponded with overweight (mean 27 (SD 5.5)), which is common in patients with chronic pain<sup>28, 58</sup> and might be due to impaired body function, activity limitation and restrictions of participation. A previous one-year follow up study found self-reported weight and height (BMI) as a significant predictor for activity limitation.<sup>59</sup> However, this could not be confirmed in the present study.

Previously or currently smoking was not found as a predictor, which is concordant to a review studying prognostic factors for pain and disability in CLBP.<sup>26</sup> In the present study, hours per week of leisure time physical activity (LTPAI) (mean 7.8 (SD 8.5) was within recommended levels of physical activity<sup>60</sup> which might have been the reason for no prognostic value. A healthy lifestyle behavior, combinations of lifestyles factors, is reported to influence the prognosis of LBP.<sup>21</sup> It could be interesting to combine and categorize various self-reported lifestyles behavioral factors for analyzing their prognostic value for patients with CLBP. However, in the present study the prognostic value of lifestyle behavioral factors were analyzed separately for later self-reported activity limitation in CLBP.

Previous prospective studies of LBP have evaluated body function by measuring spinal motion and muscle strength, showing them to be of poor prognostic value.<sup>11, 61</sup> In the present study, the body function assessed by the 6MWT was of prognostic value, showing that lower performance in the 6MWT at baseline predicted more severe activity limitation at two-year follow-up. Therefore, the 6MWT could be included as a complement to standard clinical examination of CLBP. Physical activity is a recommended intervention for patients with CLBP. The 6MWT is easy to perform and provides information of an individual's physical performance. In the future, the 6MWT might be used as a self-administrated assessment tool to promote physical activity and self-management strategies for patients with CLBP. However, the utility of 6MWT as a self-assessment tool needs to be studied further.

1  
2  
3 More severe clinical stress symptoms (SCI-93), could independently predict more severe  
4 activity limitation (RMDQ) at the two-year follow-up (Table 3). The mean score for SCI-93 at  
5 baseline was 36 (SD 21) (Table 2), which indicates an increased level of clinical stress  
6 symptoms in the group, compared to the reference values.<sup>32, 33</sup> Signs and symptoms in patients  
7 with chronic pain are suggested to be associated with prolonged stress,<sup>62</sup> but measurement of  
8 clinical stress symptoms is not standard in the clinical assessment of patients with CLBP.  
9 Therefore, the SCI-93 could provide valuable information for predicting later activity  
10 limitation for these patients. Moreover, questionnaires assessing symptoms severity might  
11 stimulate the patient's motivation in using active coping strategies to alleviate their stress  
12 responses.<sup>32</sup> Stress reduction interventions have shown to improve pain acceptance.<sup>63</sup>  
13 However, if pain acceptance might mediate the association of stress, physical activity and  
14 disability need further investigation.

15  
16  
17  
18  
19  
20  
21  
22  
23  
24  
25  
26  
27  
28  
29  
30  
31  
32  
33  
34  
35  
36  
37  
38  
39  
40  
41  
42  
43  
44  
45  
46  
47  
48  
49  
50  
51  
52  
53  
54  
55  
56  
57  
58  
59  
60  
Studies of prognostic factors for patients with acute LBP report similar predictors as this  
study to the ones in this study.<sup>64, 65</sup> However, the characteristics of the patients in the study  
used to derive the predictive model have to be similar to those in whom the model will be  
used to. Various factors can impact disability in patients with CLBP (> 12 weeks duration)  
and function and functional demands often differs between women and men. Therefore,  
women with CLBP were included in this study.

The baseline activity limitation (RMDQ) was the strongest predictor ( $R^2$  0.51) for activity  
limitation (RMDQ) at two year. The prognostic model including the baseline RMDQ, 6MWT,  
and SCI-93 explained 54% of the variance in activity limitation (RMDQ) at the two-year  
follow-up (Table 3), which is slightly more compared to findings in a previous review of  
different prognostic models explaining 28-51% of variance in persisting disability in sub  
acute LBP.<sup>22</sup> The 6MWT and SCI-93 may add useful information where the outcome of  
RMDQ is unavailable.

1  
2  
3  
4  
5 Knowledge about factors that are associated with the probable recovery or not in CLBP  
6  
7 can be used to improve the management of patients with CLBP in primary care. The results of  
8  
9 this study can give guidance for interventional trials aiming to improve physical capacity and  
10  
11 decrease stress in women with CLBP. The impact of the interaction between prognostic  
12  
13 factors and interventions on activity limitation in women with CLBP, needs further  
14  
15 investigation.  
16  
17  
18  
19  
20  
21  
22

## 23 **CONCLUSION**

24  
25 A walk test (6MWT), clinical stress symptoms (SCI-93) and activity limitation (RMDQ)  
26  
27 predicted future activity limitation in women with CLBP within PHC. The prognostic model  
28  
29 including these three predictors explained 54% of the variance in self-reported activity  
30  
31 limitation (RMDQ) after two years.  
32  
33  
34  
35  
36  
37  
38  
39  
40  
41  
42  
43  
44  
45  
46  
47  
48  
49  
50  
51  
52  
53  
54  
55  
56  
57  
58  
59  
60

### Contributors

LN contributed to the design of the study, were responsible for the data collection, participated in the statistical analysis, interpreted the data and drafted the first manuscript. LT contributed to the interpretation of data and revision of manuscript for important content. RG contributed to the design of the study, participated in the statistical analysis, interpreted the data and critically revised all versions of the manuscript. KM contributed to the design of the study, participated in the statistical analysis, interpreted the data and critically revised all versions of the manuscript. All authors read and approved the final manuscript.

### Funding

Financial support was obtained from the research and development council of Södra Älvsborg, Region Västra Götaland, Sweden. The Health & Medical Care Committee of the Regional Executive Board, Region Västra Götaland, Sweden.

### Competing interests

The authors declare that they have no competing interest.

### Ethics approval

The Regional Ethical Review Board in Gothenburg approved the study. Written informed consent was obtained from all patients.

### Data sharing statement

No additional data are available.



1  
2  
3  
4  
5  
6  
7  
8  
9  
10  
11  
12  
13  
14  
15  
16  
17  
18  
19  
20  
21  
22  
23  
24  
25  
26  
27  
28  
29  
30  
31  
32  
33  
34  
35  
36  
37  
38  
39  
40  
41  
42  
43  
44  
45  
46  
47  
48  
49  
50  
51  
52  
53  
54  
55  
56  
57  
58  
59  
60

**Figure legends**  
Figure 1. Participants flow.

For peer review only

## REFERENCES

1. SBU. Ont i ryggen ont i nacken. En evidensbaserad kunskapssammanställning. SBU rapport 145, 1&2 (Back pain, Neck Pain; An evidence Based Review. Report no. 145, 1&2): Stockholm: The Swedish Council on Technology Assessment in Health Care; 2000 [ Swedish version available at. <http://www.sbu.se> Summary and conclusions available in English at the same web site ] [Cited 11 July 2010]
2. Waddell G. *Back Pain Revolution*. Second edition ed. Edinburgh: Churchill Livingstone; 2004.
3. Airaksinen O, Brox JI, Cedraschi C, et al. Chapter 4. European guidelines for the management of chronic nonspecific low back pain. *Eur Spine J*. 2006;15 Suppl 2:S192-300.
4. Bjorck-van Dijken C, Fjellman-Wiklund A, Hildingsson C. Low back pain, lifestyle factors and physical activity: a population based-study. *J Rehab Med*. 2008;40(10):864-9.
5. Koes BW, van Tulder MW, Ostelo R, et al. Clinical guidelines for the management of low back pain in primary care: an international comparison. *Spine*. 2001;26(22):2504-13; discussion 13-4.
6. Thomas E, Silman AJ, Croft PR, et al. Predicting who develops chronic low back pain in primary care: a prospective study. *BMJ*. 1999;318(7199):1662-7.
7. Von Korff M, Deyo RA, Cherkin D, et al. Back pain in primary care. Outcomes at 1 year. *Spine*. 1993;18(7):855-62.
8. Von Korff M, Saunders K. The course of back pain in primary care. *Spine*. 1996;21(24):2833-7; discussion 8-9.
9. Henschke N, Maher CG, Refshauge KM, et al. Prognosis in patients with recent onset low back pain in Australian primary care: inception cohort study. *BMJ*. 2008;337:a171.
10. Enthoven P, Skargren E, Oberg B. Clinical course in patients seeking primary care for back or neck pain: a prospective 5-year follow-up of outcome and health care consumption with subgroup analysis. *Spine*. 2004;29(21):2458-65.
11. Enthoven P, Skargren E, Carstensen J, et al. Predictive factors for 1-year and 5-year outcome for disability in a working population of patients with low back pain treated in primary care. *Pain*. 2006;122(1-2):137-44.
12. Grotle M. Clinical course and prognostic factors in patients with low back pain and disability: a methodological and clinical study.: University of Oslo; 2004.
13. Pincus T, Burton AK, Vogel S, et al. A systematic review of psychological factors as predictors of chronicity/disability in prospective cohorts of low back pain. *Spine*. 2002;27(5):E109-20.
14. Pincus T, Vlaeyen JW, Kendall NA, et al. Cognitive-behavioral therapy and psychosocial factors in low back pain: directions for the future. *Spine*. 2002;27(5):E133-8.
15. Pengel LH, Herbert RD, Maher CG, et al. Acute low back pain: systematic review of its prognosis. *BMJ*. 2003;327(7410):323.
16. Schiottz-Christensen B, Nielsen GL, Hansen VK, et al. Long-term prognosis of acute low back pain in patients seen in general practice: a 1-year prospective follow-up study. *Fam Pract*. 1999;16(3):223-32.
17. WHO. International classification function disability and health 2001 [cited 2013 19 dec]. Available from: <http://www.who.int/classifications/icf/en/>.
18. Hayden JA, Chou R, Hogg-Johnson S, et al. Systematic reviews of low back pain prognosis had variable methods and results: guidance for future prognosis reviews. *Journal of clinical epidemiology*. 2009;62(8):781-96.e1.
19. Messing K, Stock SR, Tissot F. Should studies of risk factors for musculoskeletal disorders be stratified by gender? Lessons from the 1998 Quebec Health and Social Survey. *Scand J Work, Environ Health*. 2009;35(2):96-112.

- 1
- 2
- 3 20. Chenot JF, Becker A, Leonhardt C, et al. Sex differences in presentation, course, and
- 4 management of low back pain in primary care. *Clin J Pain*. 2008;24(7):578-84.
- 5 21. Bohman T, Alfredsson L, Jensen I, et al. Does a healthy lifestyle behaviour influence
- 6 the prognosis of low back pain among men and women in a general population? A
- 7 population-based cohort study. *BMJ open*. 2014;4(12):e005713.
- 8 22. Hilfiker R, Bachmann LM, Heitz CA, et al. Value of predictive instruments to
- 9 determine persisting restriction of function in patients with subacute non-specific low back
- 10 pain. Systematic review. *Eur Spine J*. 2007;16(11):1755-75.
- 11 23. Grotle M, Foster NE, Dunn KM, et al. Are prognostic indicators for poor outcome
- 12 different for acute and chronic low back pain consulters in primary care? *Pain*.
- 13 2010;151(3):790-7.
- 14 24. Costa Lda C, Maher CG, McAuley JH, et al. Prognosis for patients with chronic low
- 15 back pain: inception cohort study. *BMJ*. 2009;339:b3829.
- 16 25. Hayden JA, Dunn KM, van der Windt DA, et al. What is the prognosis of back pain?
- 17 *Best Pract Res Clin Rheumatol*. 2010;24(2):167-79.
- 18 26. Verkerk K, Luijsterburg PA, Miedema HS, et al. Prognostic Factors for Recovery in
- 19 Chronic Nonspecific Low Back Pain: A Systematic Review. *Phys Ther*. 2012.
- 20 27. Nordeman L, Gunnarsson R, Mannerkorpi K. Prognostic factors for work ability in
- 21 women with chronic low back pain consulting primary health care: a 2-year prospective
- 22 longitudinal cohort study. *Clin J Pain*. 2014;30(5):391-8.
- 23 28. Nordeman L, Gunnarsson R, Mannerkorpi K. Prevalence and characteristics of
- 24 widespread pain in female primary health care patients with chronic low back pain. *Clin J*
- 25 *Pain*. 2012;28(1):65-72.
- 26 29. Bush K, Kivlahan DR, McDonell MB, et al. The AUDIT alcohol consumption
- 27 questions (AUDIT-C): an effective brief screening test for problem drinking. Ambulatory
- 28 Care Quality Improvement Project (ACQUIP). Alcohol Use Disorders Identification Test.
- 29 *Arch Intern Med*. 1998;158(16):1789-95.
- 30 30. Akerstedt T, Knutsson A, Westerholm P, et al. Sleep disturbances, work stress and work
- 31 hours: a cross-sectional study. *J Psychosom Res*. 2002;53(3):741-8.
- 32 31. Nyström C, Nyström O. [Skattad stress verifierar fysiska stressymtom] Estimated stress
- 33 verifies autonomic dysfunction. *Läkartidningen*. 1996;93:2583-4.
- 34 32. Ericsson A, Nystrom C, Mannerkorpi K. Psychometric properties of the Stress and
- 35 Crisis Inventory (SCI-93) in females with fibromyalgia and chronic widespread pain. *Nord J*
- 36 *Psychiatry*. 2015;69(1):28-34.
- 37 33. Kraft B NC, Nyström O, Pedersen C. Stressreaktion och välfärdsdata - en
- 38 populationsstudie (in Swedish) [Stress reactions and welfare data - A population study].
- 39 *Socilamedicinsk Tidskrift 2004; (3) : 222-9*.
- 40 34. Mannerkorpi K, Hernelid C. Leisure Time Physical Activity Instrument and Physical
- 41 Activity at Home and Work Instrument. Development, face validity, construct validity and
- 42 test-retest reliability for subjects with fibromyalgia. *Disabil Rehabil*. 2005;27(12):695-701.
- 43 35. Pankoff BA, Overend TJ, Lucy SD, et al. Reliability of the six-minute walk test in
- 44 people with fibromyalgia. *Arthritis Care Res*. 2000;13(5):291-5.
- 45 36. King S, Wessel J, Bhambhani Y, et al. Validity and reliability of the 6 minute walk in
- 46 persons with fibromyalgia. *J Rheumatol*. 1999;26(10):2233-7.
- 47 37. Harding VR, Williams AC, Richardson PH, et al. The development of a battery of
- 48 measures for assessing physical functioning of chronic pain patients. *Pain*. 1994;58(3):367-
- 49 75.
- 50 38. Mannerkorpi K, Svantesson U, Broberg C. Relationships between performance-based
- 51 tests and patients' ratings of activity limitations, self-efficacy, and pain in fibromyalgia. *Arch*
- 52 *Phys Med Rehabil*. 2006;87(2):259-64.
- 53
- 54
- 55
- 56
- 57
- 58
- 59
- 60

- 1  
2  
3 39. Nordenskiöld UM, Grimby G. Grip force in patients with rheumatoid arthritis and  
4 fibromyalgia and in healthy subjects. A study with the Grippit instrument. *Scand J*  
5 *Rheumatol.* 1993;22(1):14-9.
- 6 40. Bergman S, Herrstrom P, Hogstrom K, et al. Chronic musculoskeletal pain, prevalence  
7 rates, and sociodemographic associations in a Swedish population study. *J Rheumatol.*  
8 2001;28(6):1369-77.
- 9 41. Lisspers J, Nygren A, Soderman E. Hospital Anxiety and Depression Scale (HAD):  
10 some psychometric data for a Swedish sample. *Acta Psychiatr Scand.* 1997;96(4):281-6.
- 11 42. Zigmond AS, Snaith RP. The hospital anxiety and depression scale. *Acta Psychiatr*  
12 *Scand.* 1983;67(6):361-70.
- 13 43. Johansson E, Lindberg P. Subacute and chronic low back pain. Reliability and validity  
14 of a Swedish version of the Roland and Morris Disability Questionnaire. *Scand J Rehabil*  
15 *Med.* 1998;30(3):139-43.
- 16 44. Linton SJ, Halldén K, Hellsing A-L. The reliability of self-reported sick absenteeism a  
17 pilot study. 1995;24:145-50.
- 18 45. Gjesfjeld C, Greeno C, Kim K. A Confirmatory Factor Analysis of an Abbreviated  
19 Social Support Instrument: The MOS-SSS. *Research on Social Work Practice.* 2008;18:231-7
- 20 46. Sullivan M, Karlsson J. The Swedish SF-36 Health Survey III. Evaluation of criterion-  
21 based validity: results from normative population. *J Clin Epidemiol.* 1998;51(11):1105-13.
- 22 47. Sullivan M, Karlsson J, Ware JE, Jr. The Swedish SF-36 Health Survey--I. Evaluation  
23 of data quality, scaling assumptions, reliability and construct validity across general  
24 populations in Sweden. *Soc Sci Med.* 1995;41(10):1349-58.
- 25 48. Persson LO, Karlsson J, Bengtsson C, et al. The Swedish SF-36 Health Survey II.  
26 Evaluation of clinical validity: results from population studies of elderly and women in  
27 Gothenburg. *J Clin Epidemiol.* 1998;51(11):1095-103.
- 28 49. Blom G. Statistical estimates and transformed beta variables. New York: John Wiley  
29 and Sons, 1958
- 30  
31  
32  
33 50. WHO. BMI classification [ cited 15 July 2015] [Available at  
34 [http://apps.who.int/bmi/index.jsp?introPage=intro\\_3.html](http://apps.who.int/bmi/index.jsp?introPage=intro_3.html) ].
- 35 51. Andersson HI, Ejlertsson G, Leden I, et al. Chronic pain in a geographically defined  
36 general population: studies of differences in age, gender, social class, and pain localization.  
37 *Clin J Pain.* 1993;9(3):174-82.
- 38 52. Pincus T, Santos R, Breen A, et al. A review and proposal for a core set of factors for  
39 prospective cohorts in low back pain: a consensus statement. *Arthritis Rheum.* 2008;59(1):14-  
40 24.
- 41 53. Deyo RA, Battie M, Beurskens AJ, et al. Outcome measures for low back pain research.  
42 A proposal for standardized use. *Spine.* 1998;23(18):2003-13.
- 43 54. Smeets R, Koke A, Lin CW, et al. Measures of function in low back pain/disorders:  
44 Low Back Pain Rating Scale (LBPRS), Oswestry Disability Index (ODI), Progressive  
45 Isoinertial Lifting Evaluation (PILE), Quebec Back Pain Disability Scale (QBPDS), and  
46 Roland-Morris Disability Questionnaire (RDQ). *Arthritis care & research.* 2011;63 Suppl  
47 11:S158-73.
- 48 55. Sigl T, Cieza A, Brockow T, et al. Content comparison of low back pain-specific  
49 measures based on the International Classification of Functioning, Disability and Health  
50 (ICF). *Clin J Pain.* 2006;22(2):147-53.
- 51 56. Grotle M, Brox JI, Vollestad NK. Functional status and disability questionnaires: what  
52 do they assess? A systematic review of back-specific outcome questionnaires. *Spine.*  
53 2005;30(1):130-40.
- 54  
55  
56  
57  
58  
59  
60

- 1  
2  
3 57. Lee CE, Simmonds MJ, Novy DM, et al. Self-reports and clinician-measured physical  
4 function among patients with low back pain: a comparison. *Arch Phys Med Rehabil*.  
5 2001;82(2):227-31.  
6 58. Mannerkorpi K, Nordeman L, Ericsson A, et al. Pool exercise for patients with  
7 fibromyalgia or chronic widespread pain: a randomized controlled trial and subgroup  
8 analyses. *J Rehab Med*. 2009;41(9):751-60.  
9 59. Wilkens P, Scheel IB, Grundnes O, et al. Prognostic factors of prolonged disability in  
10 patients with chronic low back pain and lumbar degeneration in primary care: a cohort study.  
11 *Spine*. 2013;38(1):65-74.  
12 60. WHO. Global Strategy on Diet, Physical Activity and Health: Physical Activity and  
13 Adults. Available from: [http://www.who.int/dietphysicalactivity/factsheet\\_adults/en/](http://www.who.int/dietphysicalactivity/factsheet_adults/en/).  
14 61. Grotle M, Brox JI, Veierod MB, et al. Clinical course and prognostic factors in acute  
15 low back pain: patients consulting primary care for the first time. *Spine*. 2005;30(8):976-82.  
16 62. Ellegaard H, Pedersen BD. Stress is dominant in patients with depression and chronic  
17 low back pain. A qualitative study of psychotherapeutic interventions for patients with non-  
18 specific low back pain of 3-12 months' duration. *BMC musculoskeletal disorders*.  
19 2012;13:166.  
20 63. Jeong S, Cho S. Acceptance and patient functioning in chronic pain: the mediating role  
21 of physical activity. *Qual Life Res*. 2016.  
22 64. Hayden JA, Chou R, Hogg-Johnson S, et al. Systematic reviews of low back pain  
23 prognosis had variable methods and results: guidance for future prognosis reviews. *J Clin*  
24 *Epidemiol*. 2009;62(8):781-96 e1.  
25 65. Mallen CD, Peat G, Thomas E, et al. Prognostic factors for musculoskeletal pain in  
26 primary care: a systematic review. *Br J Gen Pract*. 2007;57(541):655-61.  
27  
28  
29  
30  
31  
32  
33  
34  
35  
36  
37  
38  
39  
40  
41  
42  
43  
44  
45  
46  
47  
48  
49  
50  
51  
52  
53  
54  
55  
56  
57  
58  
59  
60

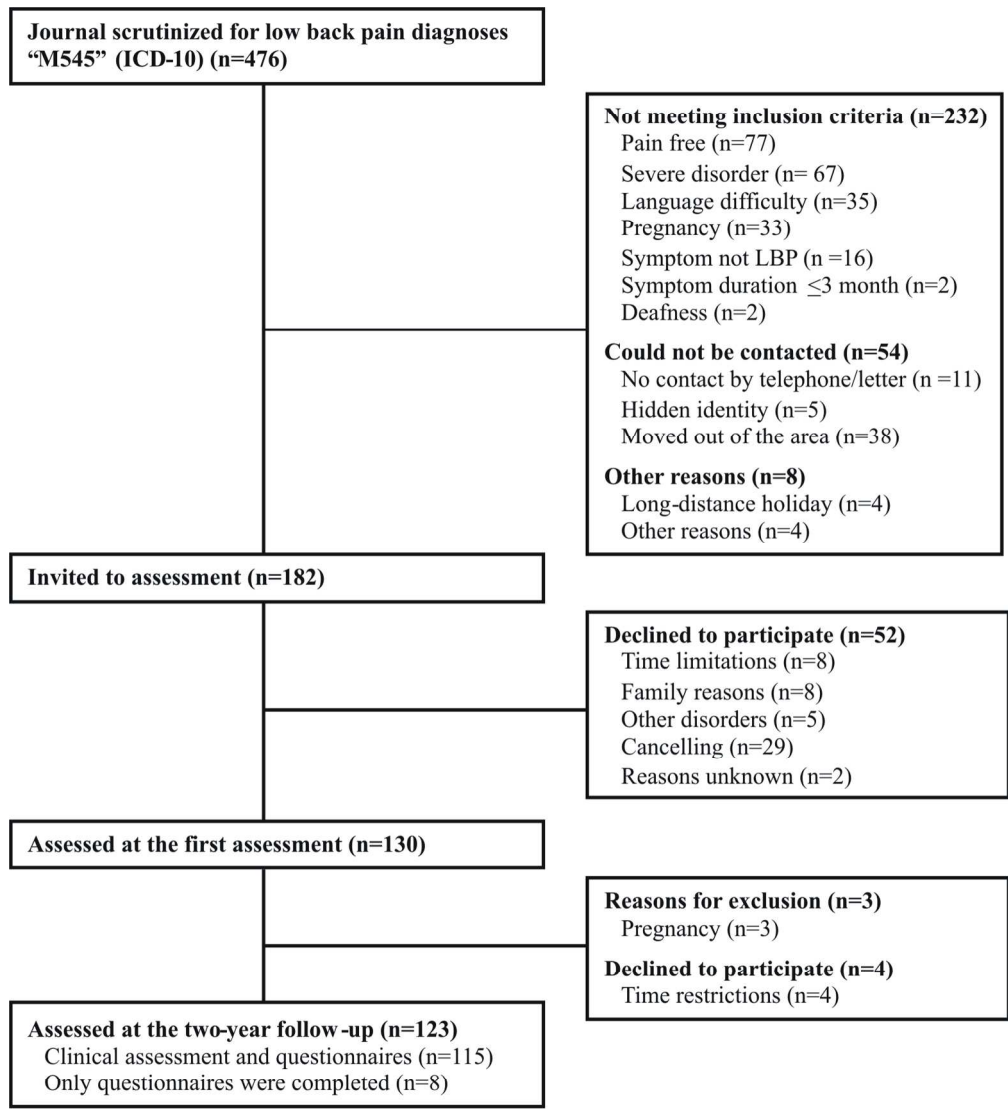

Figure 1. Participants flow.

Figure 1. Participants flow  
150x177mm (300 x 300 DPI)

STROBE 2007 (v4) Statement—Checklist of items that should be included in reports of cohort studies

| Section/Topic             | Item # | Recommendation                                                                                                                                                                       | Reported on page #                             |
|---------------------------|--------|--------------------------------------------------------------------------------------------------------------------------------------------------------------------------------------|------------------------------------------------|
| Title and abstract        | 1      | (a) Indicate the study’s design with a commonly used term in the title or the abstract                                                                                               | Noted in Title page and Abstract.<br>Pages 1,2 |
|                           |        | (b) Provide in the abstract an informative and balanced summary of what was done and what was found                                                                                  | Pages 2,3                                      |
| <b>Introduction</b>       |        |                                                                                                                                                                                      |                                                |
| Background/rationale      | 2      | Explain the scientific background and rationale for the investigation being reported                                                                                                 | Pages 5,6                                      |
| Objectives                | 3      | State specific objectives, including any prespecified hypotheses                                                                                                                     | Page 6                                         |
| <b>Methods</b>            |        |                                                                                                                                                                                      |                                                |
| Study design              | 4      | Present key elements of study design early in the paper                                                                                                                              | Pages 6,7                                      |
| Setting                   | 5      | Describe the setting, locations, and relevant dates, including periods of recruitment, exposure, follow-up, and data collection                                                      | Page 7                                         |
| Participants              | 6      | (a) Give the eligibility criteria, and the sources and methods of selection of participants. Describe methods of follow-up                                                           | Pages 6,7                                      |
|                           |        | (b) For matched studies, give matching criteria and number of exposed and unexposed                                                                                                  | NA                                             |
| Variables                 | 7      | Clearly define all outcomes, exposures, predictors, potential confounders, and effect modifiers. Give diagnostic criteria, if applicable                                             | Pages 7-10                                     |
| Data sources/ measurement | 8*     | For each variable of interest, give sources of data and details of methods of assessment (measurement). Describe comparability of assessment methods if there is more than one group | Pages 7-10                                     |
| Bias                      | 9      | Describe any efforts to address potential sources of bias                                                                                                                            | Page 11                                        |
| Study size                | 10     | Explain how the study size was arrived at                                                                                                                                            | Page 7                                         |
| Quantitative variables    | 11     | Explain how quantitative variables were handled in the analyses. If applicable, describe which groupings were chosen and why                                                         | Pages 10,11                                    |
| Statistical methods       | 12     | (a) Describe all statistical methods, including those used to control for confounding                                                                                                | Pages 11,12                                    |
|                           |        | (b) Describe any methods used to examine subgroups and interactions                                                                                                                  | Pages 11,12                                    |
|                           |        | (c) Explain how missing data were addressed                                                                                                                                          | Page 13 and Figure 1 (at page 30 )             |

|                   |     |                                                                                                                                                                                                              |                                                                    |
|-------------------|-----|--------------------------------------------------------------------------------------------------------------------------------------------------------------------------------------------------------------|--------------------------------------------------------------------|
|                   |     | (d) If applicable, explain how loss to follow-up was addressed                                                                                                                                               | Page 13 and Figure 1 (at page 30 )                                 |
|                   |     | (e) Describe any sensitivity analyses                                                                                                                                                                        | NA                                                                 |
| <b>Results</b>    |     |                                                                                                                                                                                                              |                                                                    |
| Participants      | 13* | (a) Report numbers of individuals at each stage of study—eg numbers potentially eligible, examined for eligibility, confirmed eligible, included in the study, completing follow-up, and analysed            | Page 13 and Figure 1 (at page 30 )                                 |
|                   |     | (b) Give reasons for non-participation at each stage                                                                                                                                                         | Page 13 and Figure 1 (at page 30)                                  |
|                   |     | (c) Consider use of a flow diagram                                                                                                                                                                           | Figure 1 (at page 30 )                                             |
| Descriptive data  | 14* | (a) Give characteristics of study participants (eg demographic, clinical, social) and information on exposures and potential confounders                                                                     | Page 11 and 13 and Tables 1,2 at pages 14,15                       |
|                   |     | (b) Indicate number of participants with missing data for each variable of interest                                                                                                                          | Tables 1,2 at pages 14,15                                          |
|                   |     | (c) Summarise follow-up time (eg, average and total amount)                                                                                                                                                  | Follow-up time is two years, documented throughout the manuscript. |
| Outcome data      | 15* | Report numbers of outcome events or summary measures over time                                                                                                                                               | Page 16 and Table 3 at page 17, Table 4 at page 18                 |
| Main results      | 16  | (a) Give unadjusted estimates and, if applicable, confounder-adjusted estimates and their precision (eg, 95% confidence interval). Make clear which confounders were adjusted for and why they were included | Page 11, 16 and Table 3 at page 17, Table 4 at page 18             |
|                   |     | (b) Report category boundaries when continuous variables were categorized                                                                                                                                    | NA                                                                 |
|                   |     | (c) If relevant, consider translating estimates of relative risk into absolute risk for a meaningful time period                                                                                             | NA                                                                 |
| Other analyses    | 17  | Report other analyses done—eg analyses of subgroups and interactions, and sensitivity analyses                                                                                                               | NA                                                                 |
| <b>Discussion</b> |     |                                                                                                                                                                                                              |                                                                    |
| Key results       | 18  | Summarise key results with reference to study objectives                                                                                                                                                     | Page 19                                                            |
| Limitations       | 19  | Discuss limitations of the study, taking into account sources of potential bias or imprecision. Discuss both direction and                                                                                   | Pages 19, 20                                                       |



1  
2  
3  
4  
5  
6  
7  
8  
9  
10  
11  
12  
13  
14  
15  
16  
17  
18  
19  
20  
21  
22  
23  
24  
25  
26  
27  
28  
29  
30  
31  
32  
33  
34  
35  
36  
37  
38  
39  
40  
41  
42  
43  
44  
45  
46  
47  
48  
49

|                          |    |                                                                                                                                                                            |             |
|--------------------------|----|----------------------------------------------------------------------------------------------------------------------------------------------------------------------------|-------------|
|                          |    | magnitude of any potential bias                                                                                                                                            |             |
| Interpretation           | 20 | Give a cautious overall interpretation of results considering objectives, limitations, multiplicity of analyses, results from similar studies, and other relevant evidence | Pages 19-23 |
| Generalisability         | 21 | Discuss the generalisability (external validity) of the study results                                                                                                      | Pages 19-23 |
| <b>Other information</b> |    |                                                                                                                                                                            |             |
| Funding                  | 22 | Give the source of funding and the role of the funders for the present study and, if applicable, for the original study on which the present article is based              | Page 24     |

\*Give information separately for cases and controls in case-control studies and, if applicable, for exposed and unexposed groups in cohort and cross-sectional studies.

**Note:** An Explanation and Elaboration article discusses each checklist item and gives methodological background and published examples of transparent reporting. The STROBE checklist is best used in conjunction with this article (freely available on the Web sites of PLoS Medicine at <http://www.plosmedicine.org/>, Annals of Internal Medicine at <http://www.annals.org/>, and Epidemiology at <http://www.epidem.com/>). Information on the STROBE Initiative is available at [www.strobe-statement.org](http://www.strobe-statement.org).

# BMJ Open

## Predictors for future activity limitation in women with chronic low back pain consulting primary care: a two-year prospective longitudinal cohort study

|                                 |                                                                                                                                                                                                                                                                                                                                                                                                                                                                                                                                                                                                                                                         |
|---------------------------------|---------------------------------------------------------------------------------------------------------------------------------------------------------------------------------------------------------------------------------------------------------------------------------------------------------------------------------------------------------------------------------------------------------------------------------------------------------------------------------------------------------------------------------------------------------------------------------------------------------------------------------------------------------|
| Journal:                        | <i>BMJ Open</i>                                                                                                                                                                                                                                                                                                                                                                                                                                                                                                                                                                                                                                         |
| Manuscript ID                   | bmjopen-2016-013974.R2                                                                                                                                                                                                                                                                                                                                                                                                                                                                                                                                                                                                                                  |
| Article Type:                   | Research                                                                                                                                                                                                                                                                                                                                                                                                                                                                                                                                                                                                                                                |
| Date Submitted by the Author:   | 08-Apr-2017                                                                                                                                                                                                                                                                                                                                                                                                                                                                                                                                                                                                                                             |
| Complete List of Authors:       | Nordeman, Lena; Närhälsan Research and Development Primary Health Care, Region Västra Götaland, Research and Development Center Södra Älvsborg; Göteborgs universitet Sahlgrenska Akademin, Institute of Neuroscience and Physiology, Department of Health and Rehabilitation, Unit of Physiotherapy<br>Thorselius, Lena; Närhälsan, Health Unit, Primary Health Care<br>Gunnarsson, Ronny; James Cook University College of Medicine and Dentistry, Cairns Clinical School<br>Mannerkorpi, Kaisa; Göteborgs universitet Sahlgrenska Akademin, Institute of Neuroscience and Physiology, Department of Health and Rehabilitation, Unit of Physiotherapy |
| <b>Primary Subject Heading</b>: | General practice / Family practice                                                                                                                                                                                                                                                                                                                                                                                                                                                                                                                                                                                                                      |
| Secondary Subject Heading:      | Rehabilitation medicine                                                                                                                                                                                                                                                                                                                                                                                                                                                                                                                                                                                                                                 |
| Keywords:                       | chronic pain, low back pain, PRIMARY CARE, Life style, disability                                                                                                                                                                                                                                                                                                                                                                                                                                                                                                                                                                                       |
|                                 |                                                                                                                                                                                                                                                                                                                                                                                                                                                                                                                                                                                                                                                         |

SCHOLARONE™  
Manuscripts

1  
2  
3 **Predictors for future activity limitation in women with chronic low back**  
4 **pain consulting primary care: a two-year prospective longitudinal cohort**  
5 **study**  
6  
7  
8  
9

10  
11  
12  
13 Lena Nordeman PhD RPT<sup>a,b</sup>, Lena Thorselius BCs RPT<sup>c</sup>, Ronny Gunnarsson assoc prof  
14  
15 MD<sup>a,d,e</sup>, Kaisa Mannerkorpi prof. RPT<sup>b</sup>  
16

17 *<sup>a</sup>Närhälsan, Research and Development Primary Health Care Region Västra Götaland, Research and*  
18 *Development Center Södra Älvsborg, Sweden; <sup>b</sup>University of Gothenburg, Sahlgrenska Academy, Institute of*  
19 *Neuroscience and Physiology, Department of Health and Rehabilitation, Unit of Physiotherapy, Sweden;*  
20 *<sup>c</sup>Närhälsan, Health Unit, Primary Health Care Region Västra Götaland, Sweden; <sup>d</sup>University of Gothenburg,*  
21 *Sahlgrenska Academy, Institute of Medicine, Department of Public Health and Community Medicine, Sweden;*  
22 *<sup>e</sup>Cairns clinical school, College of Medicine and Dentistry, James Cook University, Australia*  
23  
24  
25  
26

27 **Word count** (excluding title page, abstract, references, figures and tables): **3653**  
28

29 **Word count** (abstract): **300**  
30

31 **Table count:** **4**  
32

33 **Figure count:** **1**  
34

35 **References:** **65**  
36  
37  
38

39 **Corresponding author**

40  
41 Lena Nordeman

42  
43 Närhälsan, Research and Development Primary Health Care  
44 Region Västra Götaland

45  
46 Research and Development Center Södra Älvsborg

47  
48 Sven Eriksonsplatsen 4, S-503 38 Borås, Sweden

49  
50 Switchboard: +46 10-43 59 410

51  
52 Mobile: +46-70-171 44 63

53  
54 E-mail: [lena.nordeman@vgregion.se](mailto:lena.nordeman@vgregion.se)  
55  
56  
57  
58  
59  
60

## ABSTRACT

**Objectives.** To assess if body function, activity, participation, health-related quality of life and lifestyle behavioral factors can predict activity limitation in women with chronic low back pain (CLBP) in primary health care (PHC) two years later.

**Design.** A two-year prospective longitudinal cohort study within PHC.

**Settings:** Primary health care in south-western Sweden.

**Participants:** The cohort comprised 130 women with CLBP attending PHC at baseline 2004-2005 and were re-assessed after two years.

**Measures.** The dependent outcome variable was self-reported activity limitation (Roland Morris disability questionnaire (RMDQ)) at two-year follow-up. Independent predictors at baseline were age, BMI, smoking, alcohol consumption, sleep quantity and quality, leisure time physical activity, a questionnaire of clinical manifestation of stress (Stress and Crises Inventory (SCI-93)), pain localisation, pain intensity, fatigue, anxiety, depression, RMDQ, work status, private social support, health-related quality of life and measures of physical performance specified as six-minute walk test (6MWT) and hand grip strength. Relation between baseline predictors and variation in later self-reported activity limitation (RMDQ) was analysed using multivariate linear regression.

**Results.** Ninety-five percent (n=123/130) were followed up after two years. The participants were middle-aged (mean 45 (SD10) years), mostly educated more than 9 years (88%;108/123), mainly living with another adult (76%;93/122) and born in Sweden (90%;111/123). Seventy-nine percent (97/123) were categorized as having work ability at baseline. The final prognostic model including 6MWT, SCI-93 and RMDQ at baseline explained 54% of the variance in self-reported activity limitation (RMDQ) at the two-year follow-up.

**Conclusions:** Lower physical performance, more severe clinical stress symptoms and more

1  
2  
3 severe activity limitation predicted activity limitation after two years in women with CLBP  
4  
5 within PHC. The results can give guidance for interventional trials aiming to improve  
6  
7 physical capacity and decrease stress. The impact of the interaction between prognostic  
8  
9 factors and interventions on activity limitation, needs further investigation.  
10  
11

12  
13  
14  
15  
16 **Key Words:** Chronic Pain, Low Back Pain, Primary Health Care, Life Style, Disability  
17  
18 Evaluation, Prognostic Factors, Women.  
19  
20  
21  
22  
23  
24  
25  
26  
27  
28  
29  
30  
31  
32  
33  
34  
35  
36  
37  
38  
39  
40  
41  
42  
43  
44  
45  
46  
47  
48  
49  
50  
51  
52  
53  
54  
55  
56  
57  
58  
59  
60

### Strengths and limitations of this study

- The main strength of this study is the longitudinal prospective design over two years within primary health care, high long-term follow up (95%), measurements representing all the domains of International Classification of Functioning, Disability and health (ICF) complemented with lifestyle behavioural factors.
- The limitation of this study is the small sample size and that we included only women which limits the generalizability to men.

## INTRODUCTION

Non-specific chronic low back pain (CLBP), defined as pain duration longer than three months, is associated with variations of recurrent or persistent pain.<sup>1,2</sup> CLBP have various impact on body functions, activity and participation in daily life<sup>1-4</sup> and it is a common cause for attending health care.<sup>1</sup>

Non-specific acute low back pain (LBP) is described to have a spontaneous course.<sup>1,2,5</sup> However, after one year 63-82% of primary care patients with LBP report to have recurrent LBP and 20-45% impaired function.<sup>6-10</sup> Prognostic factors for the transition from non-specific acute LBP to CLBP has previously been described in personal and socioeconomic areas as well as in all domains of the International Classification of Functioning, Disability and Health (ICF).<sup>6,9,11-18</sup> Women seems to have a greater risk for CLBP<sup>6</sup> and when studying prognostic factors it is suggested to assess women separately.<sup>19-21</sup> Previous prognostic models for the transition to CLBP explain 28-51% of variability in the measured outcome.<sup>22</sup> The outcomes, combination of included prognostic factors and statistical analyses often differs between studies, making comparisons or meta-analysis difficult.<sup>18</sup>

Some studies have described similar prognostic factors for persistent CLBP as for the transition from non-specific acute LBP to CLBP.<sup>23,24</sup> Since the course of non-specific acute LBP and CLBP differs, more knowledge of prognostic factors for varying outcomes in patients with CLBP is warranted.<sup>25</sup> A previous review studying prognostic factors for delayed recovery in CLBP found no association between age, sex and the outcome measure of pain intensity and disability at short-term follow-up (e.g. 6-weeks). Conflicting evidence was found for fear of avoidance as a predictor.<sup>26</sup> At long-term follow-up (e.g. 6 months) no association was found between smoking, pain intensity, fear of avoidance and the dependent variable disability.<sup>26</sup> Conflicting evidence was found for age, sex and physical job demands and the outcome measure of pain intensity and disability. Moreover, conflicting evidence was

1  
2  
3 found for the association between age, activities of daily living, pain intensity and physical  
4 job demand and the outcome return to work.<sup>26</sup> However, recently a study showed that a  
5 physical performance test (6-minute walk test), depression and earlier work ability predicted  
6  
7  
8  
9  
10 later work ability in women with CLBP.<sup>27</sup>

11  
12  
13 The knowledge about various prognostic factors for the recovery in the long-term for  
14 patients with CLBP is still insufficient. This study is an extended analysis of the material from  
15 the two-year longitudinal cohort study of prognostic factors for work ability in women with  
16 CLBP<sup>27</sup>. The present study aim to focus on the prognostic value of lifestyle behavioral  
17 factors, stress symptoms and physical performance for future activity limitation using the  
18 same material and measurements.  
19  
20  
21  
22  
23  
24  
25  
26

27 The aim was to assess if body function, activity, participation, health-related quality of life  
28 and lifestyle behavioral factors can predict the future variance of self-rated activity limitation  
29 in women with CLBP in PHC two years later.  
30  
31  
32  
33  
34  
35  
36  
37  
38

## 39 **METHODS**

### 40 **Study design**

41 This two-year prospective longitudinal cohort study included women (n=130) with CLBP  
42 within PHC.<sup>28</sup> Patients were assessed at baseline and were re-assessed after two years.  
43  
44  
45  
46  
47  
48 Predictors for later self-reported activity limitation (Roland Morris disability questionnaire  
49 (RMDQ)), was analysed by multivariate linear regression. Independent variables found to be  
50 associated with disability in CLBP patients,<sup>27</sup> were complemented with lifestyle behavioural  
51 factors including Body Mass Index (BMI), smoking, alcohol consumption, sleep quantity and  
52 quality, leisure time physical activity and a questionnaire of the clinical manifestation of  
53  
54  
55  
56  
57  
58  
59  
60



1  
2  
3 stress. Other independent variables related to chronic pain were pain localisation, pain  
4  
5 intensity, fatigue, anxiety, depression, work status, private social support health-related  
6  
7 quality of life and two measures of physical performance.  
8

9  
10 Participants were assessed by a trained physical therapist in PHC both at baseline and after  
11  
12 two years and included a structured interview, measure of body height and weight, and the  
13  
14 two physical performance tests. Participants were asked to fill in a package of self-  
15  
16 administrated questionnaires at the assessment and two at home. They were provided with a  
17  
18 pre-paid addressed envelope to return questionnaires. If no questionnaires were returned  
19  
20 within two weeks, a reminder by telephone was made. The Regional Ethical Review Board in  
21  
22 Gothenburg approved the study. Written informed consent was obtained from all patients.  
23  
24

### 25 26 27 **Selection of patients**

28  
29 Female patients were identified by systematic search in medical charts for LBP diagnoses  
30  
31 “M545” (ICD-10) at eight PHC clinics in south-western Sweden, a mixture of urban and rural  
32  
33 populations, in 2004-2005. All patients who could be contacted, accepting participation and  
34  
35 fulfilling the inclusion criteria were invited to enroll in the study. The inclusion criteria were:  
36  
37 female patient, low back pain (pain between costal margins and gluteal folds) with or without  
38  
39 referred leg pain.<sup>1</sup> Further inclusion criteria were; longer than 12-week’s duration of  
40  
41 symptoms, not pregnant, no known spinal pathology, no other severe co-morbidity (e.g.  
42  
43 cancer, fracture, stroke, severe psychiatric disorders, mental retardation), age between 18 and  
44  
45 60 years, understanding and fluent in Swedish. At the two-year follow-up, all patients  
46  
47 included in the cross-sectional study (n=130),<sup>28</sup> who could be contacted and accepting  
48  
49 participation were invited to the follow-up, containing the same study protocol as at baseline.  
50  
51  
52  
53  
54  
55  
56  
57  
58  
59  
60

## Measurements

The structured interview included questions about age, nationality, education level, family situation, work status, back pain history (onset, duration and symptoms), co-morbidity and pharmacological treatment.

### *1. Lifestyle behavioural factors*

#### *1.1 Body Mass Index (BMI)*

Height and weight were assessed for calculating the BMI (kg/m<sup>2</sup>).

#### *1.2 Alcohol consumption*

For alcohol consumption the Alcohol Use Disorders Identification Test (Audit-C)<sup>29</sup> was used (range 0-12). Higher scores indicate higher alcohol consumption.

#### *1.3 Smoking*

Tobacco use was dichotomized into two categories, No smoker or smoker. The category, no smoker required to never been smoking. The category smoker required to previously been a smoker or are reported to be currently smoking.

#### *1.4 Sleep*

For sleep quantity and quality two questions was used.<sup>30</sup> “Do you think you get enough sleep?” (range 1-4) and “On the whole, how do you think you sleep?”(range 1-4). Higher score indicate better sleep quantity and quality.

#### *1.5 Stress symptoms*

1  
2  
3 To quantify clinical manifestations of stress symptoms the Stress and Crises Inventory (SCI-  
4  
5 93) was used (range 0-140) where higher scores indicate more severe clinical stress  
6  
7 symptoms.<sup>31, 32</sup> A total score of  $\leq 38$  indicates normal resources for activity and work.<sup>33</sup>  
8  
9

### 10 11 *1.6 Physical activity at leisure time*

12  
13 The Leisure Time Physical Activity Instrument (LTPAI) was used to assess the amount of  
14  
15 physical activity in leisure time during a typical week.<sup>34</sup> The number of hours spent for light,  
16  
17 moderate and vigorous activities was registered and the total number of hours were used.<sup>34</sup>  
18  
19

## 20 21 22 *2. Body function*

### 23 24 *2.1 Physical performance tests*

25  
26 The 6-minute walk test (6MWT) was used to assess physical performance.<sup>35-37</sup> The distance  
27  
28 (meter) is measured while the patient walks up and down a 30 meter corridor for 6 minutes.  
29  
30 The participant was instructed to walk as quickly as possible without running.  
31  
32

33  
34 Hand grip strength was measured with an electronic instrument Grippit<sup>®</sup>.<sup>38, 39</sup> A sustained  
35  
36 voluntary 10-second contraction was measured. The right hand value was used for analyses in  
37  
38 the present study.  
39  
40

### 41 42 *2.2 Number of pain localisation, pain intensity and fatigue*

43  
44 For pain distribution, a drawing of the body was used for register pain localisations (0-18).<sup>40</sup>  
45  
46 Pain intensity and fatigue during the last week was measured on a visual analogue scale 0-100  
47  
48 mm (VAS).  
49  
50

### 51 52 53 *2.3 Distress*

1  
2  
3 The Hospital Anxiety and Depression Scale (HADS), HADS-A was used for assessment of  
4 anxiety, (range 0-21) and the HADS-D for depression (range 0-21). Higher scores indicate  
5 greater anxiety or depression.<sup>41, 42</sup>  
6  
7  
8  
9

### 10 11 12 *3. Activity limitations*

13  
14 The RMDQ was used for self-reported activity limitation related to LBP. The RMDQ consists  
15 of 24 yes/no statements, where higher scores indicate greater activity limitation (range 0-24).  
16  
17  
18  
19  
20  
21  
22  
23  
24  
25  
26  
27  
28  
29  
30  
31  
32  
33  
34  
35  
36  
37  
38  
39  
40  
41  
42  
43  
44  
45  
46  
47  
48  
49  
50  
51  
52  
53  
54  
55  
56  
57  
58  
59  
60

### *4. Participation*

Work status was dichotomized into two categories, work ability or not. The category, work ability required work or study, full or part-time, applying for work, parental leave full or part-time or part-time disability pension. The category no work ability required full-time sick leave or full-time disability pension. Self-reported sick absenteeism has been shown reliable.<sup>44</sup>

### *5. Environmental factors*

The 4-item version of Medical Outcome Study Social Support Survey (MOS-SSS) registered private social support: emotional-informational, tangible, affectionate support and positive social interaction (range 1-5 for each item). Higher scores indicate more support (total range 4-20).<sup>45</sup>

### *6. Health-related quality of life*

The SF-36 short form health survey (SF-36) was used for general health status. The Physical Component Summary score (PCS) and the Mental Component Summary score (MCS) representing an overall health index of physical or mental health (range 0-100) were used.<sup>46-48</sup>

### Statistical analysis

Group characteristics are presented as mean and standard deviations (SD), median and 25<sup>th</sup> and 75<sup>th</sup> percentile or the number and percentage at baseline. Percentages change for RMDQ was constructed by subtracting baseline value from two-year follow-up value. The change was divided with baseline and multiplied by 100 to create a percentage change.

To enable more meaningful clinical interpretation small units were transformed to larger ones. In 6MWT one meter was transformed to 100 meter, in hand grip strength one Newton was transformed to 50 Newton, in the pain and fatigue scores, one mm was transformed to 10 mm (VAS).

Spearman Rank correlation between RMDQ at two years and each of the independent variables at baseline was performed to evaluate independent variables and reduce the number of independent variables of interest. This analyse was also performed between RMDQ percentages change and each of the independent variables at baseline. Independent variables with  $p < 0.20$  were included in next multivariate regression step.

Two forward stepwise multivariate linear regression analysis were performed, one with RMDQ at two years as dependent variable and one with RMDQ percentage change as dependent variable. The independent variables remaining from the first step described above were included.

Prior to the multivariate linear regression, the variables were evaluated for the assumptions of multivariate analysis. The dependent variable RMDQ at two years fulfilled the assumption of normal distribution when ranked using Blom's formula.<sup>49</sup> The statistical criteria for the independent variables were 0.05 for entry and 0.10 for removal. Multi-collinearity was checked by the values of Tolerance and VIF. The final models were adjusted for age as it could be a potential confounding factor, using standard (Enter) multivariate linear regression.

1  
2  
3 The level of significance for independent variables remaining in the final model was set to  
4  
5 0.05. The IBM SPSS Windows version 22.0 was used for the statistical analyses.  
6  
7  
8  
9  
10  
11  
12  
13  
14  
15  
16  
17  
18  
19  
20  
21  
22  
23  
24  
25  
26  
27  
28  
29  
30  
31  
32  
33  
34  
35  
36  
37  
38  
39  
40  
41  
42  
43  
44  
45  
46  
47  
48  
49  
50  
51  
52  
53  
54  
55  
56  
57  
58  
59  
60

For peer review only

## RESULTS

Ninety-five percent (n=123/130) of the participants included in the cross-sectional study<sup>28</sup> could be followed up after two years (Figure 1). Seven patients could not be assessed at the two-year follow-up, three of them due to pregnancy, an exclusion criteria in the present study. The participants were middle-aged (mean 45 (SD10)), mostly educated more than 9 years (88%; 108/123), mainly living with another adult (76%; 93/122) and born in Sweden (90%; 111/123) (Table 1). Seventy-nine percent (97/123) were categorized as having work ability at baseline. The BMI mean and median values of 27 (SD 5.5) and 26 (25<sup>th</sup>;75<sup>th</sup> percentile 23; 29) indicates that a significant proportion were overweight ( $\geq 25$  BMI).<sup>50</sup> Seventy-six percent (n=93/123) were currently non-smokers and did not exceed risk consumption of alcohol (Table 2). Only 14% (17/123) reported sleeping certainly enough and 19% (23/121) reported very good sleep quality (Table 2). Body function, activity, participation and quality of life at baseline indicates that these aspects of life varied and several of them were not optimal (Table 2).

Table 1. Group characteristics at baseline (n=123)

| <b>Personal data</b>                                        |               |
|-------------------------------------------------------------|---------------|
| Age, years [mean (SD)]                                      | 45 (10)       |
| Nationality Swedish [% (n/n)]                               | 90% (111/123) |
| Symptom duration, years [mean (SD)]                         | 9.6 (8.8)     |
| <b>Education status [% ( n/n)]</b>                          |               |
| ≤ 9 years                                                   | 12% (15/123)  |
| 10-12 years                                                 | 40% (49/123)  |
| > 12 years                                                  | 48% (59/123)  |
| <b>Social status [% (n/n)]</b>                              |               |
| Living with an adult                                        | 26% (32/122)  |
| Living with an adult and child/children                     | 50% (61/122)  |
| Living alone                                                | 12% (14/122)  |
| Living alone with child/children                            | 9.0% (11/122) |
| Living apart with an adult                                  | 3.3% (4/122)  |
| <b>Pharmacological treatment, yes [% (n/n)]<sup>a</sup></b> |               |
| Analgesics                                                  | 53% (65/123)  |
| Psychotropic drugs                                          | 16% (20/123)  |
| <b>Employment Status [% (n/n)]</b>                          |               |
| Currently working and/or studying                           | 58% (71/123)  |
| Sick-leave, full-time                                       | 11% (13/123)  |
| Sick-leave, part-time                                       | 8.9% (11/123) |
| Disability pension, full-time                               | 11% (13/123)  |
| Disability pension, part-time                               | 5.7% (7/123)  |
| Parental leave, full-time                                   | 1.6% (2/123)  |
| Parental leave, part-time                                   | 1.6% (2/123)  |
| Unemployed, full-time                                       | 0.81% (1/123) |
| Unemployed, part-time                                       | 2.4% (3/123)  |

<sup>a</sup> The use last month registered by yes or no.



Table 2. Lifestyle factors, body function, activity, participation and health related quality of life at baseline (n=123).

| <b>Lifestyle behavioral factors</b>               |                              |
|---------------------------------------------------|------------------------------|
| Body Mass Index (kg/m <sup>2</sup> ) <sup>a</sup> | 27 (5.5) --- 26 (23; 29)     |
| Audit-C (0-12) <sup>b</sup>                       | 2.2 (1.4) --- 2.0 (1.0; 3.0) |
| Smoking [% (n/n)]                                 |                              |
| never smoked                                      | 40% (49/123)                 |
| previously smoked                                 | 36% (44/123)                 |
| currently smoking                                 | 20% (25/123)                 |
| currently snuffing                                | 4% (5/123)                   |
| Sleep quantity [% (n/n)] <sup>c</sup>             |                              |
| certainly enough                                  | 14% (17/123)                 |
| broadly enough                                    | 47% (58/123)                 |
| some shortage                                     | 24% (29/123)                 |
| clearly insufficient                              | 15% (19/123)                 |
| Sleep quality [% (n/n)] <sup>d</sup>              |                              |
| very good                                         | 19% (23/121)                 |
| quite good                                        | 51% (62/121)                 |
| quite bad                                         | 21% (25/121)                 |
| very bad                                          | 9% (11/121)                  |
| SCI-93 <sup>e</sup>                               | 36 (21) --- 35 (19; 51)      |
| LTPAI, hours per week (n= 122) <sup>f</sup>       | 7.8 (8.5) --- 6.0 (3.4; 9.0) |
| <b>Body function</b>                              |                              |
| Pain localizations (0-18) <sup>g</sup>            | 4.6 (3.2) --- 4.0 (2.0; 6.0) |
| Pain intensity (VAS 0-100 mm) <sup>h</sup>        | 45 (27) --- 45 (24; 68)      |
| Fatigue (VAS 0-100 mm) <sup>h</sup>               | 53 (29) --- 53 (28; 75)      |
| 6MWT (meter) (n=121)                              | 572 (86) --- 581 (515; 633)  |
| Hand grip strength (Newton)                       | 232 (76) --- 237 (184; 285)  |
| HADS-A (0-21) <sup>i</sup>                        | 6.4 (4.4) --- 5.0 (3.0; 9.0) |
| HADS-D (0-21) <sup>i</sup>                        | 4.3 (3.6) --- 3.0 (1.0; 7.0) |
| <b>Activity (n=121)</b>                           |                              |
| RMDQ (0-24) <sup>j</sup>                          | 8.4 (4.8) --- 7.0 (4.0; 12)  |
| <b>Participation</b>                              |                              |
| Work ability (yes) [% (n/n)]                      | 79% (97/123)                 |
| <b>Environmental factors</b>                      |                              |
| Private social support (4-20) <sup>k</sup>        | 16 (3.5) --- 17 (14; 19)     |
| <b>Health-related quality of life (n=122)</b>     |                              |
| PCS (0-100) <sup>l</sup>                          | 38 (9.9) --- 39 (31; 47)     |
| MCS (0-100) <sup>l</sup>                          | 46 (13) --- 49 (37; 56)      |

<sup>a</sup> First figure mean values (standard deviation). Second figure median values (25<sup>th</sup>; 75<sup>th</sup> percentile).

<sup>b</sup> The Alcohol Use Disorders Identification Test (AUDIT-C), 3 items. Higher scores reflect higher alcohol consumption (0-12).

<sup>c</sup> One item: "Do you think you get enough sleep?"

<sup>d</sup> One item: "On the whole, how do you think you sleep?"

<sup>e</sup> Stress and crisis inventory (SCI-93). Higher scores indicate more severe clinical stress symptoms (0-140).

<sup>f</sup> The Leisure Time Physical Activity Instrument (LTPAI) assess the total hours of physical activity in leisure time during a typical week.

<sup>g</sup> Self-reported pain locations registered by a figure with predefined body locations (0-18).

<sup>h</sup> Perceived pain intensity, fatigue over the last week rated on a visual analogue scale, VAS (0-100). Higher values indicate more pain, fatigue.

<sup>i</sup> Hospital Anxiety and Depression Scale (HADS). Higher scores indicate more anxiety (0-21) and depression (0-21).

<sup>j</sup> Roland Morris disability questionnaire (RMDQ) indicates disability related to low back pain (0-24) at baseline. Higher scores indicate more severe disability.

<sup>k</sup> Medical outcome study social support survey (MOS-SSS, 4- item scale) reflects private social support ranging from 1-5. Higher scores reflect more perceived support (4-20).

<sup>l</sup> SF-36. The physical component summary score (PCS) (0-100) and mental component summary score (MCS) (0-100).

### Two-year follow-up RMDQ status

There was a statistically significant mean decrease of 1.9 points (95% CI, 1.2-2.5) on RMDQ from 8.4 (SD 4.8) at baseline to 6.4 (SD 5.5) at the two-year follow-up (-23%,  $p < 0.0001$ ).

### Predictors for activity limitation (RMDQ) at the two-year follow-up

The stepwise multivariate regression analysis showed that the 6MWT, SCI-93 and RMDQ at baseline were the most important predictors explaining 54 % of variance in the RMDQ at the two-year follow-up (Table 3). A model including age, 6MWT and SCI-93 made statistically significant contribution with adjusted  $R^2$  0.39. However, a model including only RMDQ (with or without addition of age) gave an  $R^2$  of 0.51. Models with 6MTW or SCI-93 alone gave  $R^2$  of 0.20 and 0.25 respectively.

There were no significant association between percentage change in RMDQ and any of the independent variables (Table 4).

Table 3. Prognostic factors at baseline for activity limitation at the later two-year follow-up, using the Roland Morris disability Questionnaire (RMDQ) at two-year follow-up (n=120).

|                                                | Spearman Rank Correlation |       |          | Forward stepwise multivariate linear regression <sup>a</sup> |                   |
|------------------------------------------------|---------------------------|-------|----------|--------------------------------------------------------------|-------------------|
|                                                | number                    | r     | p-value  | $\beta$ (CI 95%)                                             | p-value           |
| Age, years                                     | 120                       | 0.067 | 0.47     | -0.0048 (-0.019 - 0.010)                                     | 0.51              |
| <b>Lifestyle behavioural factors</b>           |                           |       |          |                                                              |                   |
| Body Mass Index (kg/m <sup>2</sup> )           | 119                       | 0.21  | 0.021    |                                                              |                   |
| Smoker (n=72) --- no smoker (n=48)             | 120                       | 0.14  | 0.14     |                                                              |                   |
| AUDIT-C (0-12) <sup>b</sup>                    | 118                       | -0.23 | 0.011    |                                                              |                   |
| Sleep quantity (1-4) <sup>c</sup>              | 120                       | -0.34 | 0.00014  |                                                              |                   |
| Sleep quality (1-4) <sup>d</sup>               | 118                       | -0.43 | <0.0001  |                                                              |                   |
| SCI-93 <sup>e</sup>                            | 120                       | 0.48  | <0.0001  | <b>0.0091 (0.0023 - 0.016)</b>                               | <b>0.0088</b>     |
| LTPAI, (hours per week) <sup>f</sup>           | 119                       | -0.11 | 0.24     |                                                              |                   |
| <b>Body function</b>                           |                           |       |          |                                                              |                   |
| Pain localisations (0-18) <sup>g</sup>         | 120                       | 0.36  | 0.000052 |                                                              |                   |
| Pain intensity 10 mm (VAS 0-100) <sup>h</sup>  | 120                       | 0.20  | 0.027    |                                                              |                   |
| Fatigue 10 mm (VAS 0-100) <sup>h</sup>         | 120                       | 0.24  | 0.0078   |                                                              |                   |
| 6MWT, 100 meters                               | 118                       | -0.41 | <0.0001  | <b>-0.23 (-0.42 - -0.036)</b>                                | <b>0.020</b>      |
| Hand grip strength 50 N (Newton)               | 120                       | -0.17 | 0.070    |                                                              |                   |
| HADS-A (0-21) <sup>i</sup>                     | 120                       | 0.16  | 0.089    |                                                              |                   |
| HADS-D (0-21) <sup>i</sup>                     | 120                       | 0.37  | 0.000025 |                                                              |                   |
| <b>Activity</b>                                |                           |       |          |                                                              |                   |
| RMDQ at baseline (0-24) <sup>j</sup>           | 118                       | 0.71  | <0.0001  | <b>0.10 (0.068 - 0.14)</b>                                   | <b>&lt;0.0001</b> |
| <b>Participation</b>                           |                           |       |          |                                                              |                   |
| Work ability (n=95) --- no work ability (n=25) | 120                       | -0.37 | 0.000026 |                                                              |                   |
| <b>Environmental factors</b>                   |                           |       |          |                                                              |                   |
| Private social support (4-20) <sup>k</sup>     | 120                       | -0.29 | 0.0013   |                                                              |                   |
| <b>Health-related quality of life</b>          |                           |       |          |                                                              |                   |
| PCS (0-100) <sup>l</sup>                       | 119                       | -0.42 | <0.0001  |                                                              |                   |
| MCS (0-100) <sup>l</sup>                       | 119                       | -0.28 | 0.0022   |                                                              |                   |

<sup>a</sup> Roland Morris disability questionnaire (RMDQ) score was transformed to ranked normal score of RMDQ, using Blom's formula. The final model was adjusted for age, using standard (Enter) multivariate linear regression.

<sup>b</sup> The Alcohol Use Disorders Identification Test (AUDIT-C), 3 items. Higher scores reflect higher alcohol consumption (0-12).

<sup>c</sup> One item: "Do you think you get enough sleep?". Higher scores indicates better sleep (1-4).

<sup>d</sup> One item: "On the whole, how do you think you sleep?". Higher scores indicates better sleep (1-4).

<sup>e</sup> Stress and crisis inventory (SCI-93). Higher scores indicate more severe clinical stress symptoms (0-140).

<sup>f</sup> The Leisure Time Physical Activity Instrument (LTPAI) assess the total hours of physical activity in leisure time during a typical week.

<sup>g</sup> Self-reported pain locations registered by a figure with predefined body locations (0-18).

<sup>h</sup> Perceived pain intensity, fatigue over the last week rated on a visual analogue scale, VAS (0-100). Higher values indicate more pain, fatigue.

<sup>i</sup> Hospital Anxiety and Depression Scale (HADS). Higher scores indicate more anxiety (0-21) and depression (0-21).

<sup>j</sup> Roland Morris disability questionnaire indicates disability related to low back pain (0-24) at baseline. Higher scores indicate more severe disability.

<sup>k</sup> Medical outcome study social support survey (MOS-SSS, 4- item scale) reflects private social support ranging from 1-5. Higher scores reflect more perceived support (4-20).

<sup>l</sup> SF-36. The physical component summary score (PCS) (0-100) and mental component summary score (MCS) (0-100).

Table 4. Prognostic factors at baseline for percentage change in the Roland Morris disability Questionnaire (RMDQ) (n=115).

|                                                | Spearman Rank Correlation |        |         | Forward stepwise multivariate linear regression <sup>a</sup> |         |
|------------------------------------------------|---------------------------|--------|---------|--------------------------------------------------------------|---------|
|                                                | number                    | r      | p-value | β (CI 95%)                                                   | p-value |
| Age, years                                     | 115                       | -0.11  | 0.23    | -0.0017 (-0.014-0.011)                                       | 0.79    |
| <b>Lifestyle behavioural factors</b>           |                           |        |         |                                                              |         |
| Body Mass Index (kg/m <sup>2</sup> )           | 114                       | -0.13  | 0.18    |                                                              |         |
| Smoker (n=72) --- no smoker (n=48)             | 115                       | -0.072 | 0.44    |                                                              |         |
| AUDIT-C (0-12) <sup>b</sup>                    | 113                       | 0.11   | 0.23    |                                                              |         |
| Sleep quantity (1-4) <sup>c</sup>              | 115                       | 0.18   | 0.054   |                                                              |         |
| Sleep quality (1-4) <sup>d</sup>               | 113                       | 0.16   | 0.099   |                                                              |         |
| SCI-93 <sup>e</sup>                            | 115                       | -0.17  | 0.075   |                                                              |         |
| LTPAI (hours per week) <sup>f</sup>            | 115                       | 0.13   | 0.18    |                                                              |         |
| <b>Body function</b>                           |                           |        |         |                                                              |         |
| Pain localisations (0-18) <sup>g</sup>         | 115                       | -0.15  | 0.10    |                                                              |         |
| Pain intensity 10 mm (VAS 0-100) <sup>h</sup>  | 115                       | 0.078  | 0.41    |                                                              |         |
| Fatigue 10 mm (VAS 0-100) <sup>h</sup>         | 115                       | -0.046 | 0.62    |                                                              |         |
| 6MWT, 100 meters                               | 113                       | 0.17   | 0.065   |                                                              |         |
| Hand grip strength 50 N (Newton)               | 115                       | 0.057  | 0.55    |                                                              |         |
| HADS-A (0-21) <sup>i</sup>                     | 115                       | -0.023 | 0.81    |                                                              |         |
| HADS-D (0-21) <sup>i</sup>                     | 115                       | -0.11  | 0.24    |                                                              |         |
| <b>Participation</b>                           |                           |        |         |                                                              |         |
| Work ability (n=95) --- no work ability (n=25) | 115                       | 0.15   | 0.11    |                                                              |         |
| <b>Environmental factors</b>                   |                           |        |         |                                                              |         |
| Private social support (4-20) <sup>j</sup>     | 115                       | 0.14   | 0.14    |                                                              |         |
| <b>Health-related quality of life</b>          |                           |        |         |                                                              |         |
| PCS (0-100) <sup>k</sup>                       | 114                       | 0.029  | 0.76    |                                                              |         |
| MCS (0-100) <sup>k</sup>                       | 114                       | 0.14   | 0.13    |                                                              |         |

<sup>a</sup> Percentage change in RMDQ as dependent variable. The final model was adjusted for age, using standard (Enter) multivariate linear regression.

<sup>b</sup> The Alcohol Use Disorders Identification Test (AUDIT-C), 3 items. Higher scores reflect higher alcohol consumption (0-12).

<sup>c</sup> One item: "Do you think you get enough sleep?". Higher scores indicates better sleep (1-4).

<sup>d</sup> One item: "On the whole, how do you think you sleep?". Higher scores indicates better sleep (1-4).

<sup>e</sup> Stress and crisis inventory (SCI-93). Higher scores indicate more severe clinical stress symptoms (0-140).

<sup>f</sup> The Leisure Time Physical Activity Instrument (LTPAI) assess the total hours of physical activity in leisure time during a typical week.

<sup>g</sup> Self-reported pain locations registered by a figure with predefined body locations (0-18).

<sup>h</sup> Perceived pain intensity, fatigue over the last week rated on a visual analogue scale, VAS (0-100). Higher values indicate more pain, fatigue.

<sup>i</sup> Hospital Anxiety and Depression Scale (HADS). Higher scores indicate more anxiety (0-21) and depression (0-21).

<sup>j</sup> Medical outcome study social support survey (MOS-SSS, 4- item scale) reflects private social support ranging from 1-5. Higher scores reflect more perceived support (4-20).

<sup>k</sup> SF-36. The physical component summary score (PCS) (0-100) and mental component summary score (MCS) (0-100).

## DISCUSSION

This two-year prospective cohort study of women with CLBP attending PHC showed that lower performance in walking capacity (6MWT), more severe clinical stress symptoms (SCI-93) and more severe activity limitation (RMDQ) at baseline predicted more activity limitation (RMDQ) after two years (Table 3). The model with these three predictors explained 54% of the variance in self-reported activity limitation (RMDQ) at the two-year follow-up, which is similar to a previous review of prediction models including various predictors for disability in patients with subacute non-specific LBP.<sup>22</sup>

### Strengths and limitations

This study included measurements representing all the domains of ICF<sup>17</sup> complemented with lifestyle behavioural factors, which is considered as a main strength. The follow-up frequency was very high with 95% being followed up.

Prevalence and predictors of chronic pain have been studied in general populations,<sup>21, 40, 51</sup> while the present study assessed women with CLBP consulting PHC, contributing with knowledge for health care professionals working in PHC. Previous studies found that chronic pain is more common in women, and that women are at greater risk of chronic pain and disability.<sup>6, 40, 51</sup> It has been suggested that women should be assessed separately when studying prognostic factors for LBP,<sup>19, 20</sup> hence the present study included only female patients.

The initial decision to collect variables was based on previous studies indicating suitable variables of potential interest. However, this decision led to a large number of variables and a further sorting mechanism was needed before the final multivariate regression model. This sorting mechanism could be done either by further using clinical reasoning and prior

1  
2  
3 knowledge or by looking at statistical significance. Each of these approaches will have a  
4  
5 different risk for bias. Using clinical reasoning and prior knowledge may make us blind to  
6  
7 new knowledge that previous studies missed. Using the approach we finally chose, bivariate  
8  
9 correlation in Spearman's rank correlation may cause clinically insignificant findings to be  
10  
11 put forward.  
12

13  
14 Hence, each independent variable were first evaluated in this bivariate analysis. Secondly,  
15  
16 the multivariate model was built by using the independent variables with  $p < 0.20$  in the rank  
17  
18 correlation. Physical performance (6MWT) was included in the final model. Knowing that  
19  
20 age influences physical performance, age was included as a potential confounder, even though  
21  
22 it was not correlated with RMDQ.  
23  
24

25  
26 The main reason for deploying a sorting mechanism (Spearman's rank correlation) before  
27  
28 doing the multivariate regression was to reduce the problem which may occur when there are  
29  
30 few participants relative to the number of independent variables. Hence, the number of  
31  
32 participants were considered to be sufficient for the final model.  
33  
34

35  
36 Prior to the multiple regression, the independent variables were also evaluated for  
37  
38 assumptions of multivariate analysis including checking for multicollinearity and singularity.  
39  
40 The values of Tolerance (0.52-0.74) and VIF (1.3-1.9) were checked indicating low  
41  
42 correlation between the independent variables. Moreover, questionnaires total scores was used  
43  
44 to avoid singularity.  
45  
46

47  
48 Self-administrated questionnaires are recommended for the assessment of activity  
49  
50 limitation in patients with LBP.<sup>52</sup> The present study used RMDQ as the outcome measure at  
51  
52 the two-year follow-up. The RMDQ is considered valid, commonly used and recommended in  
53  
54 LBP research for monitoring disability.<sup>53, 54</sup> Seventeen statements in the RMDQ are reported  
55  
56 to be linked to the activity component in the ICF.<sup>55, 56</sup> However, self-reports may suffer from  
57  
58  
59  
60

1  
2  
3 the fact that some patients may under or overestimate their limitations and physical  
4  
5 performance tests are suggested to complement self-reports.<sup>57</sup> Walk capacity (6MWT) and  
6  
7 hand grip strength, semi-objective measures of body function, were therefore included as  
8  
9 potential predictors in this study.  
10

11  
12 The group showed a moderate grade of disability, RMDQ 8.4 (SD 4.8), at baseline which  
13  
14 might reflect that the women included were not in acute need for treatment when recruited.  
15  
16 There was a statistical significant mean decrease of approximately 2 points on RMDQ during  
17  
18 the two-year period. Minimal clinical detectable change in the RMDQ is considered to be 2 to  
19  
20 3 points. Others have suggested a change of 4 to 5 points to be of clinical value.<sup>53</sup>  
21  
22

### 23 24 **Predictors for activity limitation (RMDQ) at two-year follow-up**

25  
26 The BMI values corresponded with overweight (mean 27 (SD 5.5)), which is common in  
27  
28 patients with chronic pain<sup>28, 58</sup> and might be due to impaired body function, activity limitation  
29  
30 and restrictions of participation. A previous one-year follow up study found self-reported  
31  
32 weight and height (BMI) as a significant predictor for activity limitation.<sup>59</sup> However, this  
33  
34 could not be confirmed in the present study.  
35  
36

37  
38 Previously or currently smoking was not found as a predictor, which is concordant to a  
39  
40 review studying prognostic factors for pain and disability in CLBP.<sup>26</sup> In the present study,  
41  
42 hours per week of leisure time physical activity (LTPAI) (mean 7.8 (SD 8.5) was within  
43  
44 recommended levels of physical activity<sup>60</sup> which might have been the reason for no  
45  
46 prognostic value. A healthy lifestyle behavior, combinations of lifestyles factors, is reported  
47  
48 to influences the prognosis of LBP.<sup>21</sup> It could be interesting to combine and categorize various  
49  
50 self-reported lifestyles behavioral factors for analyzing their prognostic value for patients with  
51  
52 CLBP. However, in the present study the prognostic value of lifestyle behavioral factors were  
53  
54 analyzed separately for later self-reported activity limitation in CLBP.  
55  
56  
57  
58  
59  
60

1  
2  
3 Previous prospective studies of LBP have evaluated body function by measuring spinal  
4 motion and muscle strength, showing them to be of poor prognostic value.<sup>11, 61</sup> In the present  
5 study, the body function assessed by the 6MWT was of prognostic value, showing that lower  
6 performance in the 6MWT at baseline predicted more severe activity limitation at two-year  
7 follow-up. Therefore, the 6MWT could be included as a complement to standard clinical  
8 examination of CLBP. Physical activity is a recommended intervention for patients with  
9 CLBP. The 6MWT is easy to perform and provides information of an individual's physical  
10 performance. In the future, the 6MWT might be used as a self-administrated assessment tool  
11 to promote physical activity and self-management strategies for patients with CLBP.  
12 However, the utility of 6MWT as a self-assessment tool needs to be studied further.  
13  
14  
15  
16  
17  
18  
19  
20  
21  
22  
23  
24

25 More severe clinical stress symptoms (SCI-93), could independently predict more severe  
26 activity limitation (RMDQ) at the two-year follow-up (Table 3). The mean score for SCI-93 at  
27 baseline was 36 (SD 21) (Table 2), which indicates an increased level of clinical stress  
28 symptoms in the group, compared to the reference values.<sup>32, 33</sup> Signs and symptoms in patients  
29 with chronic pain are suggested to be associated with prolonged stress,<sup>62</sup> but measurement of  
30 clinical stress symptoms is not standard in the clinical assessment of patients with CLBP.  
31 Therefore, the SCI-93 could provide valuable information for predicting later activity  
32 limitation for these patients. Moreover, questionnaires assessing symptoms severity might  
33 stimulate the patient's motivation in using active coping strategies to alleviate their stress  
34 responses.<sup>32</sup> Stress reduction interventions have shown to improve pain acceptance.<sup>63</sup>  
35 However, if pain acceptance might mediate the association of stress, physical activity and  
36 disability need further investigation.  
37  
38  
39  
40  
41  
42  
43  
44  
45  
46  
47  
48  
49  
50

51 Studies of prognostic factors for patients with acute LBP report similar predictors as this  
52 study to the ones in this study.<sup>64, 65</sup> However, the characteristics of the patients in the study  
53 used to derive the predictive model have to be similar to those in whom the model will be  
54  
55  
56  
57  
58  
59  
60



1  
2  
3 used to. Various factors can impact disability in patients with CLBP (> 12 weeks duration)  
4  
5 and function and functional demands often differs between women and men. Therefore,  
6  
7 women with CLBP were included in this study.  
8

9  
10 The baseline activity limitation (RMDQ) was the strongest predictor ( $R^2$  0.51) for activity  
11  
12 limitation (RMDQ) at two year. The prognostic model including the baseline RMDQ, 6MWT,  
13  
14 and SCI-93 explained 54% of the variance in activity limitation (RMDQ) at the two-year  
15  
16 follow-up (Table 3), which is slightly more compared to findings in a previous review of  
17  
18 different prognostic models explaining 28-51% of variance in persisting disability in sub  
19  
20 acute LBP.<sup>22</sup> The 6MWT and SCI-93 may add useful information where the outcome of  
21  
22 RMDQ is unavailable.  
23  
24

25  
26  
27 Knowledge about factors that are associated with the probable recovery or not in CLBP  
28  
29 can be used to improve the management of patients with CLBP in primary care. The results of  
30  
31 this study can give guidance for interventional trials aiming to improve physical capacity and  
32  
33 decrease stress in women with CLBP. The impact of the interaction between prognostic  
34  
35 factors and interventions on activity limitation in women with CLBP, needs further  
36  
37 investigation.  
38  
39  
40  
41  
42  
43  
44

## 45 **CONCLUSION**

46  
47 A walk test (6MWT), clinical stress symptoms (SCI-93) and activity limitation (RMDQ)  
48  
49 predicted future activity limitation in women with CLBP within PHC. The prognostic model  
50  
51 including these three predictors explained 54% of the variance in self-reported activity  
52  
53 limitation (RMDQ) after two years.  
54  
55  
56  
57  
58  
59  
60

### Contributors

LN contributed to the design of the study, were responsible for the data collection, participated in the statistical analysis, interpreted the data and drafted the first manuscript. LT contributed to the interpretation of data and revision of manuscript for important content. RG contributed to the design of the study, participated in the statistical analysis, interpreted the data and critically revised all versions of the manuscript. KM contributed to the design of the study, participated in the statistical analysis, interpreted the data and critically revised all versions of the manuscript. All authors read and approved the final manuscript.

### Funding

Financial support was obtained from the research and development council of Södra Älvsborg, Region Västra Götaland, Sweden. The Health & Medical Care Committee of the Regional Executive Board, Region Västra Götaland, Sweden.

### Competing interests

The authors declare that they have no competing interest.

### Ethics approval

The Regional Ethical Review Board in Gothenburg approved the study. Written informed consent was obtained from all patients.

### Data sharing statement

No additional data are available.

1  
2  
3  
4  
5  
6  
7  
8  
9  
10  
11  
12  
13  
14  
15  
16  
17  
18  
19  
20  
21  
22  
23  
24  
25  
26  
27  
28  
29  
30  
31  
32  
33  
34  
35  
36  
37  
38  
39  
40  
41  
42  
43  
44  
45  
46  
47  
48  
49  
50  
51  
52  
53  
54  
55  
56  
57  
58  
59  
60

**Figure legends**  
Figure 1. Participants flow.

For peer review only

## REFERENCES

1. SBU. Ont i ryggen ont i nacken. En evidensbaserad kunskapssammanställning. SBU rapport 145, 1&2 (Back pain, Neck Pain; An evidence Based Review. Report no. 145, 1&2): Stockholm: The Swedish Council on Technology Assessment in Health Care; 2000 [ Swedish version available at. <http://www.sbu.se> Summary and conclusions available in English at the same web site ] [Cited 11 July 2010]
2. Waddell G. *Back Pain Revolution*. Second edition ed. Edinburgh: Churchill Livingstone; 2004.
3. Airaksinen O, Brox JI, Cedraschi C, et al. Chapter 4. European guidelines for the management of chronic nonspecific low back pain. *Eur Spine J*. 2006;15 Suppl 2:S192-300.
4. Bjorck-van Dijken C, Fjellman-Wiklund A, Hildingsson C. Low back pain, lifestyle factors and physical activity: a population based-study. *J Rehab Med*. 2008;40(10):864-9.
5. Koes BW, van Tulder MW, Ostelo R, et al. Clinical guidelines for the management of low back pain in primary care: an international comparison. *Spine*. 2001;26(22):2504-13; discussion 13-4.
6. Thomas E, Silman AJ, Croft PR, et al. Predicting who develops chronic low back pain in primary care: a prospective study. *BMJ*. 1999;318(7199):1662-7.
7. Von Korff M, Deyo RA, Cherkin D, et al. Back pain in primary care. Outcomes at 1 year. *Spine*. 1993;18(7):855-62.
8. Von Korff M, Saunders K. The course of back pain in primary care. *Spine*. 1996;21(24):2833-7; discussion 8-9.
9. Henschke N, Maher CG, Refshauge KM, et al. Prognosis in patients with recent onset low back pain in Australian primary care: inception cohort study. *BMJ*. 2008;337:a171.
10. Enthoven P, Skargren E, Oberg B. Clinical course in patients seeking primary care for back or neck pain: a prospective 5-year follow-up of outcome and health care consumption with subgroup analysis. *Spine*. 2004;29(21):2458-65.
11. Enthoven P, Skargren E, Carstensen J, et al. Predictive factors for 1-year and 5-year outcome for disability in a working population of patients with low back pain treated in primary care. *Pain*. 2006;122(1-2):137-44.
12. Grotle M. Clinical course and prognostic factors in patients with low back pain and disability: a methodological and clinical study.: University of Oslo; 2004.
13. Pincus T, Burton AK, Vogel S, et al. A systematic review of psychological factors as predictors of chronicity/disability in prospective cohorts of low back pain. *Spine*. 2002;27(5):E109-20.
14. Pincus T, Vlaeyen JW, Kendall NA, et al. Cognitive-behavioral therapy and psychosocial factors in low back pain: directions for the future. *Spine*. 2002;27(5):E133-8.
15. Pengel LH, Herbert RD, Maher CG, et al. Acute low back pain: systematic review of its prognosis. *BMJ*. 2003;327(7410):323.
16. Schiottz-Christensen B, Nielsen GL, Hansen VK, et al. Long-term prognosis of acute low back pain in patients seen in general practice: a 1-year prospective follow-up study. *Fam Pract*. 1999;16(3):223-32.
17. WHO. International classification function disability and health 2001 [cited 2013 19 dec]. Available from: <http://www.who.int/classifications/icf/en/>.
18. Hayden JA, Chou R, Hogg-Johnson S, et al. Systematic reviews of low back pain prognosis had variable methods and results: guidance for future prognosis reviews. *Journal of clinical epidemiology*. 2009;62(8):781-96.e1.
19. Messing K, Stock SR, Tissot F. Should studies of risk factors for musculoskeletal disorders be stratified by gender? Lessons from the 1998 Quebec Health and Social Survey. *Scand J Work, Environ Health*. 2009;35(2):96-112.

- 1
- 2
- 3 20. Chenot JF, Becker A, Leonhardt C, et al. Sex differences in presentation, course, and
- 4 management of low back pain in primary care. *Clin J Pain*. 2008;24(7):578-84.
- 5 21. Bohman T, Alfredsson L, Jensen I, et al. Does a healthy lifestyle behaviour influence
- 6 the prognosis of low back pain among men and women in a general population? A
- 7 population-based cohort study. *BMJ open*. 2014;4(12):e005713.
- 8 22. Hilfiker R, Bachmann LM, Heitz CA, et al. Value of predictive instruments to
- 9 determine persisting restriction of function in patients with subacute non-specific low back
- 10 pain. Systematic review. *Eur Spine J*. 2007;16(11):1755-75.
- 11 23. Grotle M, Foster NE, Dunn KM, et al. Are prognostic indicators for poor outcome
- 12 different for acute and chronic low back pain consulters in primary care? *Pain*.
- 13 2010;151(3):790-7.
- 14 24. Costa Lda C, Maher CG, McAuley JH, et al. Prognosis for patients with chronic low
- 15 back pain: inception cohort study. *BMJ*. 2009;339:b3829.
- 16 25. Hayden JA, Dunn KM, van der Windt DA, et al. What is the prognosis of back pain?
- 17 *Best Pract Res Clin Rheumatol*. 2010;24(2):167-79.
- 18 26. Verkerk K, Luijsterburg PA, Miedema HS, et al. Prognostic Factors for Recovery in
- 19 Chronic Nonspecific Low Back Pain: A Systematic Review. *Phys Ther*. 2012.
- 20 27. Nordeman L, Gunnarsson R, Mannerkorpi K. Prognostic factors for work ability in
- 21 women with chronic low back pain consulting primary health care: a 2-year prospective
- 22 longitudinal cohort study. *Clin J Pain*. 2014;30(5):391-8.
- 23 28. Nordeman L, Gunnarsson R, Mannerkorpi K. Prevalence and characteristics of
- 24 widespread pain in female primary health care patients with chronic low back pain. *Clin J*
- 25 *Pain*. 2012;28(1):65-72.
- 26 29. Bush K, Kivlahan DR, McDonell MB, et al. The AUDIT alcohol consumption
- 27 questions (AUDIT-C): an effective brief screening test for problem drinking. Ambulatory
- 28 Care Quality Improvement Project (ACQUIP). Alcohol Use Disorders Identification Test.
- 29 *Arch Intern Med*. 1998;158(16):1789-95.
- 30 30. Akerstedt T, Knutsson A, Westerholm P, et al. Sleep disturbances, work stress and work
- 31 hours: a cross-sectional study. *J Psychosom Res*. 2002;53(3):741-8.
- 32 31. Nyström C, Nyström O. [Skattad stress verifierar fysiska stressymtom] Estimated stress
- 33 verifies autonomic dysfunction. *Läkartidningen*. 1996;93:2583-4.
- 34 32. Ericsson A, Nystrom C, Mannerkorpi K. Psychometric properties of the Stress and
- 35 Crisis Inventory (SCI-93) in females with fibromyalgia and chronic widespread pain. *Nord J*
- 36 *Psychiatry*. 2015;69(1):28-34.
- 37 33. Kraft B NC, Nyström O, Pedersen C. Stressreaktion och välfärdsdata - en
- 38 populationsstudie (in Swedish) [Stress reactions and welfare data - A population study].
- 39 *Socialmedicinsk Tidskrift 2004; (3):222-9*.
- 40 34. Mannerkorpi K, Hernelid C. Leisure Time Physical Activity Instrument and Physical
- 41 Activity at Home and Work Instrument. Development, face validity, construct validity and
- 42 test-retest reliability for subjects with fibromyalgia. *Disabil Rehabil*. 2005;27(12):695-701.
- 43 35. Pankoff BA, Overend TJ, Lucy SD, et al. Reliability of the six-minute walk test in
- 44 people with fibromyalgia. *Arthritis Care Res*. 2000;13(5):291-5.
- 45 36. King S, Wessel J, Bhambhani Y, et al. Validity and reliability of the 6 minute walk in
- 46 persons with fibromyalgia. *J Rheumatol*. 1999;26(10):2233-7.
- 47 37. Harding VR, Williams AC, Richardson PH, et al. The development of a battery of
- 48 measures for assessing physical functioning of chronic pain patients. *Pain*. 1994;58(3):367-
- 49 75.
- 50 38. Mannerkorpi K, Svantesson U, Broberg C. Relationships between performance-based
- 51 tests and patients' ratings of activity limitations, self-efficacy, and pain in fibromyalgia. *Arch*
- 52 *Phys Med Rehabil*. 2006;87(2):259-64.
- 53
- 54
- 55
- 56
- 57
- 58
- 59
- 60

- 1  
2  
3 39. Nordenskiöld UM, Grimby G. Grip force in patients with rheumatoid arthritis and  
4 fibromyalgia and in healthy subjects. A study with the Grippit instrument. *Scand J*  
5 *Rheumatol.* 1993;22(1):14-9.
- 6 40. Bergman S, Herrstrom P, Hogstrom K, et al. Chronic musculoskeletal pain, prevalence  
7 rates, and sociodemographic associations in a Swedish population study. *J Rheumatol.*  
8 2001;28(6):1369-77.
- 9 41. Lisspers J, Nygren A, Soderman E. Hospital Anxiety and Depression Scale (HAD):  
10 some psychometric data for a Swedish sample. *Acta Psychiatr Scand.* 1997;96(4):281-6.
- 11 42. Zigmond AS, Snaith RP. The hospital anxiety and depression scale. *Acta Psychiatr*  
12 *Scand.* 1983;67(6):361-70.
- 13 43. Johansson E, Lindberg P. Subacute and chronic low back pain. Reliability and validity  
14 of a Swedish version of the Roland and Morris Disability Questionnaire. *Scand J Rehabil*  
15 *Med.* 1998;30(3):139-43.
- 16 44. Linton SJ, Halldén K, Hellsing A-L. The reliability of self-reported sick absenteeism a  
17 pilot study. 1995;24:145-50.
- 18 45. Gjesfjeld C, Greeno C, Kim K. A Confirmatory Factor Analysis of an Abbreviated  
19 Social Support Instrument: The MOS-SSS. *Research on Social Work Practice.* 2008;18:231-7
- 20 46. Sullivan M, Karlsson J. The Swedish SF-36 Health Survey III. Evaluation of criterion-  
21 based validity: results from normative population. *J Clin Epidemiol.* 1998;51(11):1105-13.
- 22 47. Sullivan M, Karlsson J, Ware JE, Jr. The Swedish SF-36 Health Survey--I. Evaluation  
23 of data quality, scaling assumptions, reliability and construct validity across general  
24 populations in Sweden. *Soc Sci Med.* 1995;41(10):1349-58.
- 25 48. Persson LO, Karlsson J, Bengtsson C, et al. The Swedish SF-36 Health Survey II.  
26 Evaluation of clinical validity: results from population studies of elderly and women in  
27 Gothenburg. *J Clin Epidemiol.* 1998;51(11):1095-103.
- 28 49. Blom G. Statistical estimates and transformed beta variables. New York: John Wiley  
29 and Sons, 1958
- 30 50. WHO. BMI classification [ cited 15 July 2015] [Available at  
31 [http://apps.who.int/bmi/index.jsp?introPage=intro\\_3.html](http://apps.who.int/bmi/index.jsp?introPage=intro_3.html) ].
- 32 51. Andersson HI, Ejlertsson G, Leden I, et al. Chronic pain in a geographically defined  
33 general population: studies of differences in age, gender, social class, and pain localization.  
34 *Clin J Pain.* 1993;9(3):174-82.
- 35 52. Pincus T, Santos R, Breen A, et al. A review and proposal for a core set of factors for  
36 prospective cohorts in low back pain: a consensus statement. *Arthritis Rheum.* 2008;59(1):14-  
37 24.
- 38 53. Deyo RA, Battie M, Beurskens AJ, et al. Outcome measures for low back pain research.  
39 A proposal for standardized use. *Spine.* 1998;23(18):2003-13.
- 40 54. Smeets R, Koke A, Lin CW, et al. Measures of function in low back pain/disorders:  
41 Low Back Pain Rating Scale (LBPRS), Oswestry Disability Index (ODI), Progressive  
42 Isoinertial Lifting Evaluation (PILE), Quebec Back Pain Disability Scale (QBPDS), and  
43 Roland-Morris Disability Questionnaire (RDQ). *Arthritis care & research.* 2011;63 Suppl  
44 11:S158-73.
- 45 55. Sigl T, Cieza A, Brockow T, et al. Content comparison of low back pain-specific  
46 measures based on the International Classification of Functioning, Disability and Health  
47 (ICF). *Clin J Pain.* 2006;22(2):147-53.
- 48 56. Grotle M, Brox JI, Vollestad NK. Functional status and disability questionnaires: what  
49 do they assess? A systematic review of back-specific outcome questionnaires. *Spine.*  
50 2005;30(1):130-40.
- 51  
52  
53  
54  
55  
56  
57  
58  
59  
60

- 1  
2  
3 57. Lee CE, Simmonds MJ, Novy DM, et al. Self-reports and clinician-measured physical  
4 function among patients with low back pain: a comparison. *Arch Phys Med Rehabil*.  
5 2001;82(2):227-31.  
6 58. Mannerkorpi K, Nordeman L, Ericsson A, et al. Pool exercise for patients with  
7 fibromyalgia or chronic widespread pain: a randomized controlled trial and subgroup  
8 analyses. *J Rehab Med*. 2009;41(9):751-60.  
9 59. Wilkens P, Scheel IB, Grundnes O, et al. Prognostic factors of prolonged disability in  
10 patients with chronic low back pain and lumbar degeneration in primary care: a cohort study.  
11 *Spine*. 2013;38(1):65-74.  
12 60. WHO. Global Strategy on Diet, Physical Activity and Health: Physical Activity and  
13 Adults. Available from: [http://www.who.int/dietphysicalactivity/factsheet\\_adults/en/](http://www.who.int/dietphysicalactivity/factsheet_adults/en/).  
14 61. Grotle M, Brox JI, Veierod MB, et al. Clinical course and prognostic factors in acute  
15 low back pain: patients consulting primary care for the first time. *Spine*. 2005;30(8):976-82.  
16 62. Ellegaard H, Pedersen BD. Stress is dominant in patients with depression and chronic  
17 low back pain. A qualitative study of psychotherapeutic interventions for patients with non-  
18 specific low back pain of 3-12 months' duration. *BMC musculoskeletal disorders*.  
19 2012;13:166.  
20 63. Jeong S, Cho S. Acceptance and patient functioning in chronic pain: the mediating role  
21 of physical activity. *Qual Life Res*. 2016.  
22 64. Hayden JA, Chou R, Hogg-Johnson S, et al. Systematic reviews of low back pain  
23 prognosis had variable methods and results: guidance for future prognosis reviews. *J Clin*  
24 *Epidemiol*. 2009;62(8):781-96 e1.  
25 65. Mallen CD, Peat G, Thomas E, et al. Prognostic factors for musculoskeletal pain in  
26 primary care: a systematic review. *Br J Gen Pract*. 2007;57(541):655-61.  
27  
28  
29  
30  
31  
32  
33  
34  
35  
36  
37  
38  
39  
40  
41  
42  
43  
44  
45  
46  
47  
48  
49  
50  
51  
52  
53  
54  
55  
56  
57  
58  
59  
60



Figure 1. Participants flow.

Figure 1. Participants flow  
150x177mm (300 x 300 DPI)



STROBE 2007 (v4) Statement—Checklist of items that should be included in reports of cohort studies

| Section/Topic             | Item # | Recommendation                                                                                                                                                                       | Reported on page #                             |
|---------------------------|--------|--------------------------------------------------------------------------------------------------------------------------------------------------------------------------------------|------------------------------------------------|
| Title and abstract        | 1      | (a) Indicate the study’s design with a commonly used term in the title or the abstract                                                                                               | Noted in Title page and Abstract.<br>Pages 1,2 |
|                           |        | (b) Provide in the abstract an informative and balanced summary of what was done and what was found                                                                                  | Pages 2,3                                      |
| <b>Introduction</b>       |        |                                                                                                                                                                                      |                                                |
| Background/rationale      | 2      | Explain the scientific background and rationale for the investigation being reported                                                                                                 | Pages 5,6                                      |
| Objectives                | 3      | State specific objectives, including any prespecified hypotheses                                                                                                                     | Page 6                                         |
| <b>Methods</b>            |        |                                                                                                                                                                                      |                                                |
| Study design              | 4      | Present key elements of study design early in the paper                                                                                                                              | Pages 6,7                                      |
| Setting                   | 5      | Describe the setting, locations, and relevant dates, including periods of recruitment, exposure, follow-up, and data collection                                                      | Page 7                                         |
| Participants              | 6      | (a) Give the eligibility criteria, and the sources and methods of selection of participants. Describe methods of follow-up                                                           | Pages 6,7                                      |
|                           |        | (b) For matched studies, give matching criteria and number of exposed and unexposed                                                                                                  | NA                                             |
| Variables                 | 7      | Clearly define all outcomes, exposures, predictors, potential confounders, and effect modifiers. Give diagnostic criteria, if applicable                                             | Pages 7-10                                     |
| Data sources/ measurement | 8*     | For each variable of interest, give sources of data and details of methods of assessment (measurement). Describe comparability of assessment methods if there is more than one group | Pages 7-10                                     |
| Bias                      | 9      | Describe any efforts to address potential sources of bias                                                                                                                            | Page 11                                        |
| Study size                | 10     | Explain how the study size was arrived at                                                                                                                                            | Page 7                                         |
| Quantitative variables    | 11     | Explain how quantitative variables were handled in the analyses. If applicable, describe which groupings were chosen and why                                                         | Pages 10,11                                    |
| Statistical methods       | 12     | (a) Describe all statistical methods, including those used to control for confounding                                                                                                | Pages 11,12                                    |
|                           |        | (b) Describe any methods used to examine subgroups and interactions                                                                                                                  | Pages 11,12                                    |
|                           |        | (c) Explain how missing data were addressed                                                                                                                                          | Page 13 and Figure 1 (at page 30 )             |

|                   |     |                                                                                                                                                                                                              |                                                                                |
|-------------------|-----|--------------------------------------------------------------------------------------------------------------------------------------------------------------------------------------------------------------|--------------------------------------------------------------------------------|
|                   |     | (d) If applicable, explain how loss to follow-up was addressed                                                                                                                                               | Page 13 and Figure 1<br>(at page 30 )                                          |
|                   |     | (e) Describe any sensitivity analyses                                                                                                                                                                        | NA                                                                             |
| <b>Results</b>    |     |                                                                                                                                                                                                              |                                                                                |
| Participants      | 13* | (a) Report numbers of individuals at each stage of study—eg numbers potentially eligible, examined for eligibility, confirmed eligible, included in the study, completing follow-up, and analysed            | Page 13 and Figure 1<br>(at page 30 )                                          |
|                   |     | (b) Give reasons for non-participation at each stage                                                                                                                                                         | Page 13 and Figure 1<br>(at page 30)                                           |
|                   |     | (c) Consider use of a flow diagram                                                                                                                                                                           | Figure 1 (at page 30 )                                                         |
| Descriptive data  | 14* | (a) Give characteristics of study participants (eg demographic, clinical, social) and information on exposures and potential confounders                                                                     | Page 11 and 13 and<br>Tables 1,2 at pages<br>14,15                             |
|                   |     | (b) Indicate number of participants with missing data for each variable of interest                                                                                                                          | Tables 1,2 at pages<br>14,15                                                   |
|                   |     | (c) Summarise follow-up time (eg, average and total amount)                                                                                                                                                  | Follow-up time is<br>two years,<br>documented<br>throughout the<br>manuscript. |
| Outcome data      | 15* | Report numbers of outcome events or summary measures over time                                                                                                                                               | Page 16 and Table 3<br>at page 17, Table 4<br>at page 18                       |
| Main results      | 16  | (a) Give unadjusted estimates and, if applicable, confounder-adjusted estimates and their precision (eg, 95% confidence interval). Make clear which confounders were adjusted for and why they were included | Page 11, 16 and<br>Table 3 at page 17,<br>Table 4 at page 18                   |
|                   |     | (b) Report category boundaries when continuous variables were categorized                                                                                                                                    | NA                                                                             |
|                   |     | (c) If relevant, consider translating estimates of relative risk into absolute risk for a meaningful time period                                                                                             | NA                                                                             |
| Other analyses    | 17  | Report other analyses done—eg analyses of subgroups and interactions, and sensitivity analyses                                                                                                               | NA                                                                             |
| <b>Discussion</b> |     |                                                                                                                                                                                                              |                                                                                |
| Key results       | 18  | Summarise key results with reference to study objectives                                                                                                                                                     | Page 19                                                                        |
| Limitations       | 19  | Discuss limitations of the study, taking into account sources of potential bias or imprecision. Discuss both direction and                                                                                   | Pages 19, 20, 21                                                               |

1  
2  
3  
4  
5  
6  
7  
8  
9  
10  
11  
12  
13  
14  
15  
16  
17  
18  
19  
20  
21  
22  
23  
24  
25  
26  
27  
28  
29  
30  
31  
32  
33  
34  
35  
36  
37  
38  
39  
40  
41  
42  
43  
44  
45  
46  
47  
48  
49

|                          |    |                                                                                                                                                                            |             |
|--------------------------|----|----------------------------------------------------------------------------------------------------------------------------------------------------------------------------|-------------|
|                          |    | magnitude of any potential bias                                                                                                                                            |             |
| Interpretation           | 20 | Give a cautious overall interpretation of results considering objectives, limitations, multiplicity of analyses, results from similar studies, and other relevant evidence | Pages 19-23 |
| Generalisability         | 21 | Discuss the generalisability (external validity) of the study results                                                                                                      | Pages 19-23 |
| <b>Other information</b> |    |                                                                                                                                                                            |             |
| Funding                  | 22 | Give the source of funding and the role of the funders for the present study and, if applicable, for the original study on which the present article is based              | Page 24     |

\*Give information separately for cases and controls in case-control studies and, if applicable, for exposed and unexposed groups in cohort and cross-sectional studies.

**Note:** An Explanation and Elaboration article discusses each checklist item and gives methodological background and published examples of transparent reporting. The STROBE checklist is best used in conjunction with this article (freely available on the Web sites of PLoS Medicine at <http://www.plosmedicine.org/>, Annals of Internal Medicine at <http://www.annals.org/>, and Epidemiology at <http://www.epidem.com/>). Information on the STROBE Initiative is available at [www.strobe-statement.org](http://www.strobe-statement.org).
